# Supplementary material for: Seasonality, molecular epidemiology, and virulence of Respiratory Syncytial Virus (RSV): A perspective into the Brazilian Influenza Surveillance Program
Source: PubMed Central journal article supplement (PMC8130917; doi:10.1371/journal.pone.0251361), 2021-05-18
Supplement: pone.0251361.s017.pdf [file pone.0251361.s017.pdf]

# PLOS ONE

## Seasonality, molecular epidemiology and virulence of Respiratory Syncytial Virus (RSV): a perspective into the Brazilian Influenza Surveillance Program

--Manuscript Draft--

|                               |                                                                                                                                                                                                                                                                                                                                                                                                                                                                                                                                                                                                                                                                                                                                                                                                                                                                                                                                                                                                                                                                                                                                                                                                                                                                                                                                                                                                                                                                                                                                                                                                                                                                                                                                                                                                                                                                                                                                                                                                                                                                           |
|-------------------------------|---------------------------------------------------------------------------------------------------------------------------------------------------------------------------------------------------------------------------------------------------------------------------------------------------------------------------------------------------------------------------------------------------------------------------------------------------------------------------------------------------------------------------------------------------------------------------------------------------------------------------------------------------------------------------------------------------------------------------------------------------------------------------------------------------------------------------------------------------------------------------------------------------------------------------------------------------------------------------------------------------------------------------------------------------------------------------------------------------------------------------------------------------------------------------------------------------------------------------------------------------------------------------------------------------------------------------------------------------------------------------------------------------------------------------------------------------------------------------------------------------------------------------------------------------------------------------------------------------------------------------------------------------------------------------------------------------------------------------------------------------------------------------------------------------------------------------------------------------------------------------------------------------------------------------------------------------------------------------------------------------------------------------------------------------------------------------|
| <b>Manuscript Number:</b>     | PONE-D-20-30854R1                                                                                                                                                                                                                                                                                                                                                                                                                                                                                                                                                                                                                                                                                                                                                                                                                                                                                                                                                                                                                                                                                                                                                                                                                                                                                                                                                                                                                                                                                                                                                                                                                                                                                                                                                                                                                                                                                                                                                                                                                                                         |
| <b>Article Type:</b>          | Research Article                                                                                                                                                                                                                                                                                                                                                                                                                                                                                                                                                                                                                                                                                                                                                                                                                                                                                                                                                                                                                                                                                                                                                                                                                                                                                                                                                                                                                                                                                                                                                                                                                                                                                                                                                                                                                                                                                                                                                                                                                                                          |
| <b>Full Title:</b>            | Seasonality, molecular epidemiology and virulence of Respiratory Syncytial Virus (RSV): a perspective into the Brazilian Influenza Surveillance Program                                                                                                                                                                                                                                                                                                                                                                                                                                                                                                                                                                                                                                                                                                                                                                                                                                                                                                                                                                                                                                                                                                                                                                                                                                                                                                                                                                                                                                                                                                                                                                                                                                                                                                                                                                                                                                                                                                                   |
| <b>Short Title:</b>           | Landscape of Respiratory Syncytial Virus (RSV)                                                                                                                                                                                                                                                                                                                                                                                                                                                                                                                                                                                                                                                                                                                                                                                                                                                                                                                                                                                                                                                                                                                                                                                                                                                                                                                                                                                                                                                                                                                                                                                                                                                                                                                                                                                                                                                                                                                                                                                                                            |
| <b>Corresponding Author:</b>  | Lucas Alves Vianna, M.D<br>UFES: Universidade Federal do Espirito Santo<br>Vitoria, ES BRAZIL                                                                                                                                                                                                                                                                                                                                                                                                                                                                                                                                                                                                                                                                                                                                                                                                                                                                                                                                                                                                                                                                                                                                                                                                                                                                                                                                                                                                                                                                                                                                                                                                                                                                                                                                                                                                                                                                                                                                                                             |
| <b>Keywords:</b>              | RSV; Viral load; Genotypes; Severity; seasonality; phylogenetics.                                                                                                                                                                                                                                                                                                                                                                                                                                                                                                                                                                                                                                                                                                                                                                                                                                                                                                                                                                                                                                                                                                                                                                                                                                                                                                                                                                                                                                                                                                                                                                                                                                                                                                                                                                                                                                                                                                                                                                                                         |
| <b>Abstract:</b>              | <p>Background: Respiratory Syncytial Virus (RSV) is the main cause of pediatric morbidity and mortality. The complex evolution of RSV creates a need for worldwide surveillance, which may assist in the understanding of multiple viral aspects.</p> <p>Objectives: This study aimed to investigate RSV features under the Brazilian Influenza Surveillance Program, evaluating the role of viral load and genetic diversity in disease severity and the influence of climatic factors in viral seasonality.</p> <p>Methodology: We have investigated the prevalence of RSV in children up to 3 years old with severe acute respiratory infection (SARI) in the Espirito Santo State (ES), Brazil, from 2016 to 2018. RT-qPCR allowed for viral detection and viral load quantification, to evaluate association with clinical features and mapping of local viral seasonality. Gene G sequencing and phylogenetic reconstruction demonstrated local genetic diversity.</p> <p>Results: Of 632 evaluated cases, 56% were caused by RSV, with both subtypes A and B co-circulating throughout the years. A discrete inverse association between average temperature and viral circulation was observed. No correlation between viral load and severity was observed, but children infected with RSV-A presented higher clinical severity score (CSS) median, stayed longer in the hospital, required more intensive care and ventilatory support than those infected by RSV-B. Regarding RSV diversity, some local genetic groups were observed in the main genotypes circulation RSV-A ON1 and RSV-B BA, with strains showing modifications in the G gene amino acid chain.</p> <p>Conclusion: Local RSV studies using the Brazilian Influenza Surveillance Program are relevant because they can reveal useful information, contributing to the global RSV surveillance. Understanding seasonality, virulence and genetic diversity can support the suitability of future antiviral drugs and vaccines and assist in the administration of prophylactic strategies.</p> |
| <b>Order of Authors:</b>      | Lucas Alves Vianna, M.D<br>Marilda Mendonça Siqueira<br>Lays Paula Bondi Volpini<br>Iuri Drumond Louro<br>Paola Cristina Resende                                                                                                                                                                                                                                                                                                                                                                                                                                                                                                                                                                                                                                                                                                                                                                                                                                                                                                                                                                                                                                                                                                                                                                                                                                                                                                                                                                                                                                                                                                                                                                                                                                                                                                                                                                                                                                                                                                                                          |
| <b>Opposed Reviewers:</b>     |                                                                                                                                                                                                                                                                                                                                                                                                                                                                                                                                                                                                                                                                                                                                                                                                                                                                                                                                                                                                                                                                                                                                                                                                                                                                                                                                                                                                                                                                                                                                                                                                                                                                                                                                                                                                                                                                                                                                                                                                                                                                           |
| <b>Response to Reviewers:</b> | Editor comments:<br>Comment 1: Please ensure that your manuscript meets PLOS ONE's style requirements, including those for file naming. The PLOS ONE style templates can be found at:                                                                                                                                                                                                                                                                                                                                                                                                                                                                                                                                                                                                                                                                                                                                                                                                                                                                                                                                                                                                                                                                                                                                                                                                                                                                                                                                                                                                                                                                                                                                                                                                                                                                                                                                                                                                                                                                                     |

[https://journals.plos.org/plosone/s/file?id=wjVg/PLOOne\\_formatting\\_sample\\_main\\_body.pdf](https://journals.plos.org/plosone/s/file?id=wjVg/PLOOne_formatting_sample_main_body.pdf) and

[https://journals.plos.org/plosone/s/file?id=ba62/PLOOne\\_formatting\\_sample\\_title\\_authors\\_affiliations.pdf](https://journals.plos.org/plosone/s/file?id=ba62/PLOOne_formatting_sample_title_authors_affiliations.pdf)

Answer: After a careful review, we have modified the formatting of the headings and legends of the supplementary figures and tables to meet PLOS ONE's style requirements. We also corrected some tables that presented values highlighted in red, contrary to the rules of PLOS ONE. Finally, we increased the font size of the Materials and methods, Results and Discussion subheadings to 16 pt, according to rules.

Comment 2: We note that you included minors (age<18) in your study. Please provide additional details regarding minor's consent. In the ethics statement in the Methods and online submission information, please ensure that you have specified whether you obtained consent from parents or guardians. If the need for consent was waived by the ethics committee, please include this information."

Answer: We agree with this observation. The sentence "The need for parents or guardians' consent was waived by the ethics committee." was included in "Ethics Statement" section. Please, check the lines 207-208.

Reviewer #1 comments:

1. Title - Revise the title to reflect the key findings of the research.

Answer: To address this comment, we have changed the title to: "Seasonality, molecular epidemiology and virulence of Respiratory Syncytial Virus (RSV): a perspective into the Brazilian Influenza Surveillance Program". However, considering that this study addressed several aspects of RSV, the inclusion of key findings would make the title too large and we have opted to make it shorter and easier to read.

2. Introduction - Revise the introduction and make it shorter and its current form it distracts the reader.

Answer: We have changed the introduction and eliminated sentences that, although interesting, would not affect the understanding of the objectives. However, Introduction size reduction was small. It turns out that this study has addressed multiple aspects of RSV (e.g.: prevalence, association between severity and subtypes, viral load, seasonality and association with climatic factors and phylogenetic aspects), as we understand that these are important aspects to discuss.

3. Methodology - Organize the Methodology - Study population, experimental methods - RT-qPCR, sequencing etc. in a brief form that gives a good understanding of the sequence of events with relevant methodology.

Answer: We have changed the way methods are presented, in order to maintain the same pattern presented at the results.

Thus, methods are now as follows:

1. Population sampling, study period and location
2. RSV and Influenza detection and subtyping
3. Clinical and epidemiological data collection
4. Viral load quantification
5. Climate data collection
6. Partial amplification and sequencing of glycoprotein gene
7. RSV genotyping and gene G phylogenetic reconstruction
8. Statistical treatment.
9. Data availability
10. Ethics Statement

4. Results - They need to be organized in the order of appearance as in the Methodology. You do not have to replicate all the information given in the Tables in the texts. Redundancy also distracts the reader and I found it difficult to organize the results to understand the authors' way of cohesion.

Answer: We think this comment will make the manuscript easier to read. As recommended, we have reorganized the objectives in the same pattern presented in the results, and eliminated redundant information.

5. Discussion - Again follow the order of your results in Discussion.

Answer: We have organized the discussion in the same order presented in Methods and Results and created subsections in the discussion, in order to improve reading.

6. Overall - You must revise this manuscript shortening certain sections and organizing the manuscript from I to D. Otherwise the results produced cannot be understood by the authors.

Answer: To address this recommendation, we have reduced the text as much as possible, without interfering with data presentation quality and consistency. We have reduced redundancies in the results (data being presented in the text and table) and removed some excerpts throughout the manuscript that we consider less relevant.

7. Language must be clear, correct, and unambiguous. At its current form it is difficult to follow the authors. Please also look into typographical or grammatical errors when you revise the manuscript. You may ask a native speaker to read the manuscript after fixing all the issues indicated.

Answer: we have asked a native speaker to thoroughly review the manuscript.

8. Please follow the PLOS ONE formatting guidelines well before you submit after revision.

Answer: We have done so.

Reviewer #2 comments:

1. The authors present generalized conclusions that are not specific to the Brazilian aspect or timeframe on which this study is based. Key results to support the identified objectives are not highlighted in the abstract or the conclusion (e.g. the influence of climate factors on RSV seasonality and the role of genetic diversity of RSV on disease severity). Clinical severity scores referenced in the abstract and results to support interpretations of the role of viral load and genetic diversity of RSV on disease severity, should be presented in the main tables/figures of the manuscript as opposed to supplemental. The authors should revise these areas and sharpen the focus of their Discussion through reduction to improve readability and presentation of key messages of RSV surveillance in Brazil between 2016-2018 relative to previous observations in Brazil or other parts of the world during the similar timeframe.

Answer: We appreciate the observations. However, some results of this study are not related to a specific location or timeframe. The correlation analyzes between viral load, genetic differences and severity are examples. These results possibly transcend the time and place of the study and, therefore, are not specific to the Brazilian aspect or timeframe.

As recommended, we have included the key results in both abstract and conclusion. We also transformed supplementary table 4 into Table 3. Previous table 3, which presented data on viral load, is now part of Table 4.

Given the different approaches taken in the study, we chose to divide the discussion into topics, in the hope of improving the quality of reading and regarding the discussion length, we removed some less important passages in order to improve the readability and presentation of key messages of the study.

2. The current title (and abstract) fail to address the presented timeframe of RSV

surveillance or what aspects of “landscape” or “perspectives” the authors are referring to relative to their objectives and results. The authors should consider revision.

Answer: as changing the Title was also a recommendation of Reviewer 1, and to clarify which aspects of the “landscape” the study focused on, we have changed the title to: “Seasonality, molecular epidemiology and virulence of Respiratory Syncytial Virus (RSV): a perspective into the Brazilian Influenza Surveillance Program”. We hope this new title is suitable for both Reviewers.

3. Figure 2 and Figure 3 are out of focus and uninterpretable for review. The authors should revise.

Answer: Figures 2 and 3 were redone to improve quality and readability. We decided to change the size and save the file as .EPS.

4. Line 90-92, 130-133, and 270-276. The authors statement of “seasonal oscillation” (Line 90-92) is not supported by their main observations (Line 270-276) from Fig. 1, and in turn, their statement regarding “creating difficulties for determination of the most appropriate period to start prophylaxis” is not substantiated and is in contrast to their later statement of “recommends the administration of palivizumab from February to July” (Line 359). The authors state (Line 130-133) that “seasonality onset and end were defined as the first and last of 2 consecutive weeks, respectively, when the number of RSV cases exceeded 10% of the number detected during the RSV peak week” and reference Obando-Pacheco et al 2018 [21]. However, Obando-Pacheco et al 2018 states that “the onset of RSV season was defined as the first 2 consecutive weeks when >10% of the total tested samples for respiratory pathogens were positive for RSV. The end of the RSV season was defined similarly as when the proportion of positive RSV tests fell below 10% for 2 consecutive weeks.”. Given the impact of molecular testing on determining RSV seasonality, the authors should revise their analysis and adopt a more accepted threshold for seasonality assessment based on %RSV positive cases as opposed to the number of RSV cases to support a potential interpretation of “seasonal oscillation” (see also Midgley et al. 2017 JID 216(3):345-355).

Answer: We agree with the Reviewer, and, in fact, there was a misinterpretation of season beginning and end definition by Obando-Pacheco et al. (2018). Therefore, we reviewed the data and corrected the analysis. However, there were no changes in season onset in any year, but there were small changes in season end, as described below:

1. End in 2016: from EW 33 to EW 32.
2. End in 2017: from EW 30 to EW 31.
3. End in 2018: from EW 26 to EW 27.

Although the reviewer understood that the data do not support the claim that there was a fluctuation in season period during the study, we would like to point out that in 2016 and 2017 the RSV seasonal period started at epidemiological week (EW) 12 and ended at EW 32 and 31, respectively. In contrast, in 2018 the season was anticipated to EW 3, which is 9 weeks before the start in previous years. Season end was also anticipated to EW 27. There are the reasons why we understand there was an oscillation in the seasonal period during our study. As Palivizumab is administered in five consecutive monthly doses and considering that the first dose should be administered one month before season start, this oscillation may have an impact in the administration of prophylactic drugs.

In order to make this point clearer, we have restructured the discussion paragraphs.

5. Table 1: The authors should revise this Table to provide both numerators and denominators to allow for readability and logical follow with the main text. This will also allow the reader to appropriately follow the statistical assessment employed of relative proportions. In addition, Influenza prevalence is noted in the main text, but not in the corresponding Table 1. The authors should to revise the Table to include all relevant data for the reader.

Answer: we have revised Table 1, making the requested changes.

6.Line 225-232 and Table 2: The authors should rephrase their statement regarding “clinical features of patients affect by RSV” to better reflect clinical characteristics of patients with SARI, since clinical data are presented for the total 632 patients and the 327 patients with RSV (180 RSV-A and 147 RSV-B). The numbers and percentages in the main text reflect the total population (N=632) and not the population of patients with RSV disease (N=327). The authors should further revise this Table to provide both numerators and denominators to allow for readability and logical follow with the main text. This will also allow the reader to appropriately follow the statistical assessment employed of relative proportions and to distinguish between RSV and everything else. Finally, viral load data in Table 2 is out of place without a (%) and should be included in Table 3 where viral load values are presented.

Answer: Table 2 and the associated text present clinical data only of RSV infected patients. This table had an error in the "Sample number" field, which contained the total number of samples studied (632), however, the analyzes were performed only with the 352 RSV positive children. The error has been corrected. We took the opportunity to correct some fields containing three decimal places, standardizing the values to two decimal places. We have also relocated table 2 viral load data to table 3, as suggested. Finally, we included denominators to facilitate data interpretation.

#### Minor Comments for Author (Required)

7.Line 17 and 40. The authors are repetitive in their statements in the Background and Conclusion sections of their Abstract regarding “understanding seasonality, genetic features...may support antiviral and vaccine development. The authors should revise the abstract and clarify how the results of this study specifically support antiviral and vaccine development.

Answer: We have eliminated the redundant part from the "Background" and briefly discussed how seasonal period, virulence and genetic diversity can assist in the development and application of vaccines and antiviral drugs.

8.Lines 21, 38, 81, 83, 88, 339-440. Is the Brazilian Influenza Surveillance Program part of WHO's Global Respiratory Syncytial Virus Surveillance Pilot and/or the Global Influenza Surveillance and Response System (GISRS)? The authors should consider revising for clarity; in particular Lines 338-340 at the start of the Discussion section where both programs are discussed in the context of the objectives of the current study. Recommend that the authors be consistent throughout the manuscript in their reference to the Influenza Surveillance Program as to which this study is based on (ie. National, Brazilian, or just Influenza Surveillance Program are used throughout the manuscript; pick one version and capitalize all words).

Answer: The Brazilian Influenza Surveillance Program is part of WHO's Global Respiratory Syncytial Virus Surveillance. We chose to use the term “Brazilian Influenza Surveillance Program” with capital words, as suggested.

9.Line 30 and Line 105: What were the remaining 44% of case caused by, all influenza?

Answer: In this study, only RSV and Influenza were tested. In 56% of the cases RSV was detected, the influenza virus was found in 7% of the samples and the remaining 37% cases were undetermined.

10.Line 48: The authors should clarify in the text the source of the “Influenza and other respiratory virus epidemiological reports” as to whether these are from the Brazilian and/or National Influenza Surveillance Program.

Answer: We have followed previous Reviewers' recommendations to shorten the introduction, and because of that we have removed this text, as explained to the other reviewer.

11.Line 57: The authors should explain the rationale as to why the previously observed significant association between viral load and disease severity should be more carefully studied in the Introduction. The authors later state in the Discussion that the correlation between viral load and disease severity remains controversial (Line 423). The authors are advised to further emphasize that one of the strengths of their study in finding of a lack of correlation between viral load and disease severity is the use of standardized methods for measuring viral load (see Lines 432-442)

Answer: To address that, we have rewritten the Introduction as follows:  
“Some studies have evaluated the association between viral load and disease severity, with significant associations [6,7]. However, most of these studies did not use standardized methods of viral load measurement, therefore, this relationship must be more carefully evaluated.”

12.Line 60: The authors should revise this sentence to clarify that the context by which “the treatment is based” in referring to RSV since this is new paragraph.

Answer: We have rephrased the sentence to: “RSV treatment is based only [...]”.

13.Line 72: The authors should supplement reference 15 with a reference that defines the multiple genotypes of RSV-B.

Answer: We have added the study by Trento et al. (2006) which was already mentioned in reference #17 (now reference #14, since due to the removal of some sections to reduce the text, the corresponding references were also removed).

14.Line 78: Reference 15 does not support the statement that understanding RSV genetic diversity will help designing antiviral drugs, diagnostic assays, and vaccines. The authors should revise.

Answer: It is possible to find in reference 15 (now reordered to reference 13) two excerpts that support this statement: “RSV diversity is an important factor that allows for reinfections to occur throughout life and also has implications for design of diagnostic assays, antiviral therapies, and preventive strategies (passive immunization and vaccines)”. (in the introduction).

“Genotype classification and assignment is of importance in order to understand the evolution, epidemiology, and clinical presentation of this virus, and has implications regarding the development of vaccines and other preventive interventions.” (in the discussion).

15.Fig 1: The y-axis and X-axis should be labeled within the figure.

Answer: Figure 1 has been edited, including caption for the two Y axes and the X axis. Caption is displayed in a text box.

16.Line 126-127: Location of INCAPER should be provided.

Answer: We have included the city, state and country of INCAPER. Please, check the line 145.

17.Line 143: The authors should define in Supplemental Table 1 or elsewhere in the main text what RSV gene the primers and probes used to subtype RSV-A and RSV-B were directed against.

Answer: In the methodology, we include the requested information as follows: “RSV positive samples (i.e. those with cycle threshold [CT]  $\leq$  40) were subtyped using specific primers and probes to N gene of RSV-A and RSV-B.” Please, check the line 105.

18.Line 161: The authors should clarify what they mean by “partial amplification” and by RSV positive samples with Ct values between 30-40 were not subjected or attempted for sequencing.

Answer: Partial amplification in this case refers to the fact only part of the gene was

|                                                                                                                                                                                                                                                                                                                                                                                                                                                                                                     |                                                                                                                                                                                                                                                                                                                                                                                                                                                                                                                                                                                                                                                                                                                                                                                                                                                                                                                                                                                                                                                                                                                               |
|-----------------------------------------------------------------------------------------------------------------------------------------------------------------------------------------------------------------------------------------------------------------------------------------------------------------------------------------------------------------------------------------------------------------------------------------------------------------------------------------------------|-------------------------------------------------------------------------------------------------------------------------------------------------------------------------------------------------------------------------------------------------------------------------------------------------------------------------------------------------------------------------------------------------------------------------------------------------------------------------------------------------------------------------------------------------------------------------------------------------------------------------------------------------------------------------------------------------------------------------------------------------------------------------------------------------------------------------------------------------------------------------------------------------------------------------------------------------------------------------------------------------------------------------------------------------------------------------------------------------------------------------------|
|                                                                                                                                                                                                                                                                                                                                                                                                                                                                                                     | <p>amplified. We have included the approximate sequenced G gene fragment size, as follows:<br/> “The partial gene G amplification (about 730 bp) was performed at LVRS/IOC/FIOCRUZ”<br/> We have also included the following sentence in bold: “a cycle threshold (ct) value less than 30, due to the difficulty in sequencing samples with higher ct than this;”</p> <p>19.Line 179-180: The authors should provide a reference to the source of their reference sequences.</p> <p>Answer: The requested data is already available in supplementary tables 2 and 3. All reference sequences were taken from NCBI Genbank. These supplementary tables contain access numbers, genotypes and collection locations of each sequence.</p> <p>20.Line 37, 74, 194, 294, 334, 421, 444, 466: The authors should correct their documentation of the RSV B genotype from BA to BA1 per the accession number provided and documented.</p> <p>Answer: The classification into the BA cluster is controversial. We prefer classify as BA. More studies are needed to standardize the RSV nomenclature of genotypes into BA and ON1.</p> |
| <b>Additional Information:</b>                                                                                                                                                                                                                                                                                                                                                                                                                                                                      |                                                                                                                                                                                                                                                                                                                                                                                                                                                                                                                                                                                                                                                                                                                                                                                                                                                                                                                                                                                                                                                                                                                               |
| <b>Question</b>                                                                                                                                                                                                                                                                                                                                                                                                                                                                                     | <b>Response</b>                                                                                                                                                                                                                                                                                                                                                                                                                                                                                                                                                                                                                                                                                                                                                                                                                                                                                                                                                                                                                                                                                                               |
| <p><b>Financial Disclosure</b></p> <p>Enter a financial disclosure statement that describes the sources of funding for the work included in this submission. Review the <a href="#">submission guidelines</a> for detailed requirements. View published research articles from <a href="#">PLOS ONE</a> for specific examples.</p> <p>This statement is required for submission and <b>will appear in the published article</b> if the submission is accepted. Please make sure it is accurate.</p> | <p>This work was funded by Espirito Santo Research and Innovation Support Foundation (FAPES; <a href="https://fapes.es.gov.br/">https://fapes.es.gov.br/</a>), under project Fapes/CNPq nº 05/2017 and by INOVA Fiocruz Program (<a href="https://portal.fiocruz.br/programa-inova-fiocruz">https://portal.fiocruz.br/programa-inova-fiocruz</a>), under project VPPCB-008-FIO-18. The funders had no role in study design, data collection and analysis, decision to publish, or preparation of the manuscript.</p>                                                                                                                                                                                                                                                                                                                                                                                                                                                                                                                                                                                                          |

**Unfunded studies**

Enter: *The author(s) received no specific funding for this work.*

**Funded studies**

Enter a statement with the following details:

- Initials of the authors who received each award
- Grant numbers awarded to each author
- The full name of each funder
- URL of each funder website
- Did the sponsors or funders play any role in the study design, data collection and analysis, decision to publish, or preparation of the manuscript?
- **NO** - Include this sentence at the end of your statement: *The funders had no role in study design, data collection and analysis, decision to publish, or preparation of the manuscript.*
- **YES** - Specify the role(s) played.

\* typeset

**Competing Interests**

Use the instructions below to enter a competing interest statement for this submission. On behalf of all authors, disclose any [competing interests](#) that could be perceived to bias this work—acknowledging all financial support and any other relevant financial or non-financial competing interests.

This statement **will appear in the published article** if the submission is accepted. Please make sure it is accurate. View published research articles from [PLOS ONE](#) for specific examples.

The authors have declared that no competing interests exist.



**NO authors have competing interests**

Enter: *The authors have declared that no competing interests exist.*

**Authors with competing interests**

Enter competing interest details beginning with this statement:

*I have read the journal's policy and the authors of this manuscript have the following competing interests: [insert competing interests here]*

\* typeset

**Ethics Statement**

Enter an ethics statement for this submission. This statement is required if the study involved:

- Human participants
- Human specimens or tissue
- Vertebrate animals or cephalopods
- Vertebrate embryos or tissues
- Field research

Write "N/A" if the submission does not require an ethics statement.

General guidance is provided below. Consult the [submission guidelines](#) for detailed instructions. **Make sure that all information entered here is included in the Methods section of the manuscript.**

This project was approved by the Human Research Ethics Committee of the Health Sciences Center of the Federal University of Espirito Santo (UFES), under the number: 018577/2018; CAAE: 84633518.1.0000.5060. The need for parents or guardians consent was waived by the ethics committee.

**Format for specific study types**

**Human Subject Research (involving human participants and/or tissue)**

- Give the name of the institutional review board or ethics committee that approved the study
- Include the approval number and/or a statement indicating approval of this research
- Indicate the form of consent obtained (written/oral) or the reason that consent was not obtained (e.g. the data were analyzed anonymously)

**Animal Research (involving vertebrate animals, embryos or tissues)**

- Provide the name of the Institutional Animal Care and Use Committee (IACUC) or other relevant ethics board that reviewed the study protocol, and indicate whether they approved this research or granted a formal waiver of ethical approval
- Include an approval number if one was obtained
- If the study involved *non-human primates*, add *additional details* about animal welfare and steps taken to ameliorate suffering
- If anesthesia, euthanasia, or any kind of animal sacrifice is part of the study, include briefly which substances and/or methods were applied

**Field Research**

Include the following details if this study involves the collection of plant, animal, or other materials from a natural setting:

- Field permit number
- Name of the institution or relevant body that granted permission

**Data Availability**

Authors are required to make all data underlying the findings described fully available, without restriction, and from the time of publication. PLOS allows rare exceptions to address legal and ethical concerns. See the [PLOS Data Policy](#) and [FAQ](#) for detailed information.

Yes - all data are fully available without restriction

A Data Availability Statement describing where the data can be found is required at submission. Your answers to this question constitute the Data Availability Statement and **will be published in the article**, if accepted.

**Important:** Stating 'data available on request from the author' is not sufficient. If your data are only available upon request, select 'No' for the first question and explain your exceptional situation in the text box.

Do the authors confirm that all data underlying the findings described in their manuscript are fully available without restriction?

**Describe where the data may be found in full sentences. If you are copying our sample text, replace any instances of XXX with the appropriate details.**

- If the data are **held or will be held in a public repository**, include URLs, accession numbers or DOIs. If this information will only be available after acceptance, indicate this by ticking the box below. For example: *All XXX files are available from the XXX database (accession number(s) XXX, XXX).*
- If the data are all contained **within the manuscript and/or Supporting Information files**, enter the following: *All relevant data are within the manuscript and its Supporting Information files.*
- If neither of these applies but you are able to provide **details of access elsewhere**, with or without limitations, please do so. For example:

*Data cannot be shared publicly because of [XXX]. Data are available from the XXX Institutional Data Access / Ethics Committee (contact via XXX) for researchers who meet the criteria for access to confidential data.*

*The data underlying the results presented in the study are available from (include the name of the third party*

The sequences produced here were deposited on GenBank platform, under the accession 203 number MW026969–MW027004 and MW030961–MW030981, and in GISAID 204 platform, under the accession number EPI\_ISL\_549271- EPI\_ISL\_549327.

*and contact information or URL).*

- This text is appropriate if the data are owned by a third party and authors do not have permission to share the data.

\* typeset

Additional data availability information:

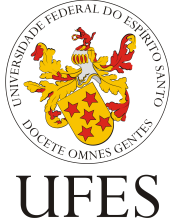

**Universidade Federal do Espírito Santo (UFES)**  
Pró-Reitoria de Pesquisa e Pós-Graduação (PRPPG)  
Programa de Pós-graduação em Biotecnologia (PPGBiotec)  
Núcleo de Genética Humana e Molecular (NGHM)

Vitoria, January 25th, 2021.

To: Editor-in-chief of Plos One

Dear Editor,

After carefully addressing all observations made by the peer reviewers, we are happy to submit the revised version of our study now entitled: “Seasonality, molecular epidemiology and virulence of Respiratory Syncytial Virus (RSV): a perspective into the Brazilian Influenza Surveillance Program” for consideration by Plos One, as a primary research article. RSV leads the causes of respiratory infections in infants and small children, been responsible for millions of hospitalizations and thousands of deaths worldwide. In this article, we have used the Brazilian Influenza Surveillance Program to investigate the prevalence of RSV in children under 3 years old in Espírito Santo State, Southeast Brazil, between 2016 and 2018. We explored RSV seasonality over time and investigated whether climatic factors influence RSV circulation. We have also sequenced G gene to explore the circulating genotypes from both subtypes (RSVA and RSVB). G gene phylogenies allowed us to understand how the strains found in this study are related to those that circulate worldwide. Clinical data from patients enabled us to infer that RSVA is responsible for the development of a more severe disease than RSVB. Finally, we performed a normalized viral load study that demonstrated an absence of association between severity and viral titer. The implementation of RSV surveillance at a global level has become one of the World Health Organization’s priorities, which, in 2017, started the pilot project to assess the suitability of the use of the Global Influenza Surveillance and Response System in RSV surveillance. We believe that our study enriches the knowledge regarding multiple aspects of RSV and may help to establish a global surveillance network.

We are hopeful that the manuscript is now suitable for publication.

Sincerely,

Lucas Alves Vianna

E-mail: [lucasavianna@gmail.com](mailto:lucasavianna@gmail.com)

1 **Full Title: Seasonality, molecular epidemiology and virulence of Respiratory**  
2 **Syncytial Virus (RSV): a perspective into the Brazilian Influenza Surveillance**  
3 **Program**

4 **Short Title: Landscape of Respiratory Syncytial Virus (RSV)**

5 Lucas A. Vianna<sup>1,2</sup>, Marilda M. Siqueira<sup>3</sup>, Lays P. B. Volpini<sup>4</sup>, Iuri D. Louro<sup>2</sup>, Paola C.  
6 Resende<sup>3</sup>

7 <sup>1</sup> Central Laboratory of Public Health of the State of Espirito Santo, Vitoria, Espirito  
8 Santo, Brazil.

9 <sup>2</sup> Nucleus of Human and Molecular Genetics/ Federal University of Espirito Santo/  
10 UFES, Vitoria, Espirito Santo, Brazil.

11 <sup>3</sup> Laboratory of Respiratory Viruses and Measles, National Influenza Center (NIC)/  
12 World Health Organization (WHO), Oswaldo Cruz Institute, Oswaldo Cruz Foundation,  
13 Rio de Janeiro, Rio de Janeiro, Brazil.

14 <sup>4</sup> Virology & Infectious Gastroenteritis Laboratory / Federal University of Espirito Santo  
15 /UFES, Vitoria, Espirito Santo, Brazil.

## 16 **Abstract**

17 **Background:** Respiratory Syncytial Virus (RSV) is the main cause of pediatric morbidity  
18 and mortality. The complex evolution of RSV creates a need for worldwide surveillance,  
19 which may assist in the understanding of multiple viral aspects.

20 **Objectives:** This study aimed to investigate RSV features under the Brazilian Influenza  
21 Surveillance Program, evaluating the role of viral load and genetic diversity in disease  
22 severity and the influence of climatic factors in viral seasonality.

23 **Methodology:** We have investigated the prevalence of RSV in children up to 3 years old  
24 with severe acute respiratory infection (SARI) in the Espirito Santo State (ES), Brazil,

25 from 2016 to 2018. RT-qPCR allowed for viral detection and viral load quantification, to  
26 evaluate association with clinical features and mapping of local viral seasonality. Gene G  
27 sequencing and phylogenetic reconstruction demonstrated local genetic diversity.

28 **Results:** Of 632 evaluated cases, 56% were caused by RSV, with both subtypes A and B  
29 co-circulating throughout the years. A discrete inverse association between average  
30 temperature and viral circulation was observed. No correlation between viral load and  
31 severity was observed, but children infected with RSV-A presented higher clinical  
32 severity score (CSS) median, stayed longer in the hospital, required more intensive care  
33 and ventilatory support than those infected by RSV-B. Regarding RSV diversity, some  
34 local genetic groups were observed in the main genotypes circulation RSV-A ON1 and  
35 RSV-B BA, with strains showing modifications in the G gene amino acid chain.

36 **Conclusion:** Local RSV studies using the Brazilian Influenza Surveillance Program are  
37 relevant because they can reveal useful information, contributing to the global RSV  
38 surveillance. Understanding seasonality, virulence and genetic diversity can support the  
39 suitability of future antiviral drugs and vaccines and assist in the administration of  
40 prophylactic strategies.

## 41 **Introduction**

42 Respiratory Syncytial Virus (RSV) is the most common pathogen associated with  
43 acute respiratory tract infections (ARTI), being the main cause of bronchiolitis and  
44 pneumonia in infants and small children [1]. 

45 RSV infection can cause a range of symptoms, varying from mild upper  
46 respiratory tract illness to severe lower respiratory tract infection [2]. The reason for  
47 different outcomes is still unclear, however it can be related to the underline conditions,  
48 genetic or acquired host factors, and/or viral characteristics [3,4]. Some studies have

49 evaluated the association between viral load and disease severity with significant  
50 associations [4,5]. However, most of these studies did not use standardized methods of  
51 viral load measurement, therefore, this relationship must be more carefully evaluated. The  
52 understanding of RSV infection viral load may be a tool to establish its relationship with  
53 disease progression, severity, clinical outcome and drug intervention timeframe [6].

54 RSV treatment is based only in supportive care and infection prevention is limited  
55 to passive immunoprophylaxis (Palivizumab) and case isolation [2]. No licensed RSV  
56 vaccine is available, but some promising candidates are currently in development and in  
57 advanced clinical trial phases [7].

58 RSV strains can be classified into two serogroups: RSV-A and RSV-B [8]. The  
59 potential virulence attributed to a specific group remains controversial: some authors have  
60 pointed RSV-A [9,10] or RSV-B [11] as the most virulent subtype, other studies have not  
61 found significant differences between them [12]. 

62 Multiple genotypes were described for RSV-A and RSV-B, based on gene G  
63 second hypervariable region (HVR-2) [13,14]. In the past two decades important shifts  
64 occurred with the emergence of new RSV-A and RSV-B genotypes: RSV-A ON1  
65 containing a duplication of 72 nucleotides, and RSV-B BA with a duplication of 60  
66 nucleotides in the HVR-2 gene G [14,15]. These genotypes replaced previous ones and  
67 have spread globally. Understanding their genetic diversity may reveal the virus's ability  
68 to cause re-infections throughout life, and help designing antiviral drugs, diagnostic  
69 assays and vaccines [13].

70 In 2017, the World Health Organization (WHO) launched the Global Respiratory  
71 Syncytial Virus Surveillance Pilot in order to test the feasibility of using the Global  
72 Influenza Surveillance and Response System (GISRS) for RSV surveillance without  
73 adversely affecting influenza surveillance [16]. This pilot study results from the global



74 concern about RSV impact on public health. Brazil, one of four countries in the Americas  
75 included in the pilot, has a remarkable respiratory virus surveillance program, however,  
76 more data are required for a better understanding of factors such as RSV circulation,  
77 evolution, and pathogenicity. In this study, we used the Brazilian Influenza Surveillance  
78 Program to analyze the local prevalence of RSV in children with SARI and to evaluate  
79 which factors are potentially associated with disease severity. We also explored the viral  
80 seasonality and investigate the influence of climatic factors in the circulation. Finally, we  
81 conducted a phylogenetic study to understand how the local genetic diversity of RSV  
82 behaves with that observed in the rest of the world.

## 83 **Materials and methods**

### 84 **Population sampling, study period and location**

85 This study is a retrospective investigation of respiratory samples (nasopharyngeal  
86 secretions, tracheal and bronchoalveolar aspirate and bronchoalveolar lavage) collected  
87 from the Brazilian Influenza Surveillance Program during 34 months (March 7th, 2016,  
88 to December 14th, 2018). A total of 632 samples collected from pediatric patients (from  
89 0 to 36 months old) classified as SARI, residents of 60 municipalities in the ES State,  
90 were enrolled in this study. ES state is located in southeastern Brazil and it has a territory  
91 of 46.074,447 km<sup>2</sup>, with a population of approximately 4.1 million inhabitants [17]. These  
92 samples were screened by real-time RT-qPCR for RSV and Influenza A/B at the ES  
93 Central Public Health Laboratory (LACEN/ES), one of 26 Brazilian laboratories that  
94 integrate the Brazilian Ministry of Health Influenza Surveillance Program.

95

### 96 **RSV and Influenza detection and subtyping**

97 Nucleic acids were extracted from respiratory samples using the PureLink™ Viral  
98 RNA/DNA Mini Kit (Invitrogen®, Thermo Fisher Scientific©), according to  
99 manufacturer's protocol. All samples were tested initially for Influenza A and B in a  
100 TaqMan® one-step real time RT-PCR (RT-qPCR) assay with primers and probes specific  
101 for influenza (CDC, USA), according to manufacturer's recommendations. Additionally,  
102 RT-qPCR assay was performed to identify positive RSV cases using GoTaq® Probe 1-  
103 Step RT-qPCR Kit (Promega, Madison, WI, EUA). RSV positive samples (*i.e.* those with  
104 cycle threshold [CT]  $\leq 40$ ) were subtyped using specific primers and probes to RSV-A  
105 and RSV-B N gene. In parallel, Ribonuclease P RNA (RNase P) was tested as an internal  
106 control for each sample and all batches had an RNA extraction negative control (MOCK)  
107 and a PCR negative control (NTC). All primers and probes are described in the **S1 Table**.

108

## 109 **Clinical and epidemiological data collection**

110 Clinical and epidemiological data were retrieved mainly from the Information System of  
111 Diseases of Compulsory Declaration of Notification Illness (SINAN) and, in some cases  
112 – where the SINAN file was incomplete – we assessed patients' Medical Records to fill  
113 missing information. The main information recovered from SINAN were: 1) clinical  
114 outcome (recovered or death); 2) hospitalization length; 3) oxygen administration need  
115 and type (invasive or not invasive), 4) intensive care unit (ICU) need and length; 5)  
116 clinical characteristics (fever, cough, dyspnea, O<sub>2</sub> saturation, respiratory distress,  
117 comorbidities) and 6) epidemiological and demographical features (age, race, town or  
118 area of residence).

119 We have used the Brazilian Ministry of Health definition of SARI, that is: hospitalized  
120 patient with fever and cough or sore throat and presenting dyspnea or O<sub>2</sub> saturation <95%,  
121 or respiratory distress [18]. A Clinical Severity Score (CSS) was adapted from Martinello

122 *et al.* [19]. The scale ranged from 0 to 5 points, where 0 was the mildest condition and 5  
123 the most severe. ICU admission, hospitalization length  $\geq 5$  days, oxygen saturation  $\leq 95\%$   
124 and oxygen therapy noninvasive methods accounted for 1 point each. Two points were  
125 assigned for mechanical ventilation.

126

## 127 **Viral load quantification**

128 RSV viral load was determined by RT-qPCR using a protocol adapted from Álvarez-  
129 Argüelles *et al.* [20], including a synthetic  $\beta$ -globin dsDNA as a template. To quantify  
130 the RSV copy number, expressed in copies per cell (c/c), we designed a dsDNA  
131 containing the annealing regions of RSV primers and probe, as well as the upstream and  
132 downstream regions (150 bp). This synthetic DNA was incorporated into a pMA-T  
133 plasmid, which was used in the RT-qPCR. Standard curves for absolute quantification of  
134 RSV and  $\beta$ -globin gene were generated by 10-fold serial dilutions ( $10^6$ - $10^1$  copies of  
135 genome), in triplicate. RSV primers, probe and the thermal cycling protocol used were  
136 the same used in the diagnostic phase.  $\beta$ -globin primers and probe are listed in **S1 Table**.  
137 All amplification assays were carried out in the ABI 7500 equipment (Applied  
138 Biosystems, Foster City, CA, USA). Viral load status was compared with different  
139 clinical features and epidemiological data.

140

## 141 **Climate data collection**

142 Climate data (precipitation, temperature and humidity) of five cities – representatives  
143 from the different geographic regions of the state – were daily collected and kindly  
144 provided by the Capixaba Institute of Research, Technical Assistance and Rural  
145 Extension (INCAPER), Vitoria, Espírito Santo, Brazil. The weekly average was accessed  
146 by assembling daily data from all collection sites for each epidemiological week (EW).

147 The definition of RSV epidemic period was based on a previously described protocol  
148 [21], which considers RSV outbreak onset, peak and end. Seasonality onset was defined  
149 as the first of 2 consecutive weeks when  $\geq 10\%$  of tested samples for respiratory pathogens  
150 were positive for RSV. Similarly, RSV season end was defined when the proportion of  
151 positive RSV tests fell below 10% for two consecutive weeks. Peak was determined as  
152 the week when the maximum number of RSV positive cases occurred [21].

153

### 154 **Partial amplification and sequencing of glycoprotein gene**

155 RSV-A and RSV-B positive samples were selected to be sequenced based on the  
156 following criteria: a) cycle threshold (ct) value less than 30, due to the difficulty in  
157 sequencing samples with ct higher than this; b) representativeness by collection date; c)  
158 distinct clinical outcomes; and d) different viral load values.

159 The partial gene G amplification (about 730 bp) was performed at  
160 LVRS/IOC/FIOCRUZ, the National Influenza Center, by conventional RT-PCR, using  
161 the QIAGEN OneStep RT-PCR Kit (Qiagen) and a pair of primers (**S1 Table**) for each  
162 subtype. The reverse transcription was performed at 55°C for 30 minutes and the cDNA  
163 was amplified by PCR (40 cycles of 94°C/30 seconds, 60°C /1 minute, 72°C/1 minute  
164 and a final extension at 72°C/10 minutes). Amplification was confirmed in a 1% agarose  
165 gel. DNA was purified using ExoSap-IT Kit (Affymetrix, Inc., USA) and submitted to  
166 sequence reaction using BigDye™ Terminator v3.1 Cycle Sequencing Kit (Applied  
167 Biosystems, Foster City, CA, USA) and primers at 3.2  $\mu\text{molar}$ . The reads were obtained  
168 in the ABI 3130XL Genetic Analyzer (Applied Biosystems). Consensus sequences were  
169 built from electropherograms comparison with a reference sequence in the software  
170 Sequencher 5.1 [22]. The adopted nomenclature pattern hereon was “hRSV  
171 subtype/country/ES-sample number/year.”

172

## 173 **RSV genotyping and gene G phylogenetic reconstruction**

174 RSV-A and RSV-B gene G DNA sequences (711 bp and 726 bp, respectively) were used  
175 to reconstruct phylogenetic relationships. Genotyping was based on gene G HVR-2, using  
176 RSV-A and RSV-B sequences (336 bp and 318 bp, respectively). Reference sequences  
177 of previously described genotypes are shown in **S2 Table**. Additionally, to place our  
178 sequences in a global context we performed a BLAST search (Basic Local Alignment  
179 Search Tool), available at <https://blast.ncbi.nlm.nih.gov/Blast.cgi>. These sequences (**S3**  
180 **Table**) were labeled with country of origin and collection year, and those with more than  
181 99.5% genetic similarity using CD-HIT tool ([http://weizhongli-lab.org/cd-](http://weizhongli-lab.org/cd-hit/servers.php)  
182 [hit/servers.php](http://weizhongli-lab.org/cd-hit/servers.php)) were removed from the final dataset. Alignments were conducted using  
183 Muscle algorithm, via MEGA 6.0 software [23] and when necessary they were adjusted  
184 manually. The phylogenetic trees were constructed using the Maximum Likelihood (ML)  
185 method, complete deletion for gap or missing data treatment and 1000 replicates of  
186 bootstrap probabilities tools integrated within Mega 6.0. General Time Reversible +  
187 Gamma (GTR+G) was the nucleotide substitution model elected for all analysis on  
188 JModelTest software, with an exception for RSV-A, which Tamura-Nei + Gamma  
189 (TrN+G) was the substitution model nucleotide indicated for the analysis [24]. Average  
190 pairwise distance (p-distance) was calculated in Mega 6.0. Amino acid comparisons with  
191 the reference sequences of ON1 (JN257693) and BA (AY333364) were performed using  
192 MEGA 6.0 software to map the changes in Brazilian samples amino acids.

193

## 194 **Statistical treatment**

195 Statistical analyses were performed using SPSS 20.0 (SPSS, Inc., Chicago, IL) and R  
196 v.3.4.4 software. Chi-square, Fisher exact, Mann–Whitney and Kruskal Wallis were used

197 whenever appropriated. To test the association between climate data and RSV circulation  
198 we performed the Spearman correlation test. A p-value of less than 0.05 was considered  
199 statistically significant.

200

## 201 **Data availability**

202 The sequences produced here were deposited on GenBank platform, under the accession  
203 number MW026969–MW027004 and MW030961-MW030981, and in GISAID  
204 platform, under the accession number EPI\_ISL\_549271- EPI\_ISL\_549327.

205

## 206 **Ethics Statement**

207 This project was approved by the Human Research Ethics Committee of the Health  
208 Sciences Center of the Federal University of Espirito Santo (UFES), under the number:  
209 018577/2018; CAAE: 84633518.1.0000.5060. The need for parents or guardians consent  
210 was waived by the ethics committee.

211

## 212 **Results**

### 213 **RSV clinical and epidemiological data**

214 A total of 632 respiratory samples collected from children under 3 years-old were tested  
215 by RT-qPCR for Influenza A, Influenza B and RSV, ~~being RSV~~ the most prevalent  
216 pathogen found in these samples (56%; 352/632) (**Table 1**). From RSV positive cases,  
217 54% (180/352) were RSV-A, 147 (44%) were RSV-B, co-detections with both subtypes  
218 were found in 5 cases (1.5%). Twenty samples could not be subtyped. Influenza  
219 frequency was 7.4% (47/632), being 74.4% (35/47) Influenza A H1N1 pdm09, 14.9%

220 (7/47) H3N2 and 10.6% (5/47) Influenza B. Male gender was slightly more affected by  
 221 RSV (n=182; 52%) and median age was 4 months old (1-11.0 interquartile range; IQR).  
 222 Of positive cases, 99.7% (351/352) were classified as SARI and 14 deaths (4%) were  
 223 reported. Most children were brown (54%), according to the self-racial classification  
 224 filled out by children's legal guardian.

225

226 **Table 1.** Number of tested samples, RSV positivity, subtype prevalence and demographic data from each  
 227 year and the whole study period. Statistical tests were performed to verify the statistical significance of data  
 228 differences among years. Statistically significant values are highlighted in bold.

|                                | <b>2016</b><br>n (%) | <b>2017</b><br>n (%) | <b>2018</b><br>n (%) | <i>p-value</i>               | <b>2016-18</b><br>n (%) |
|--------------------------------|----------------------|----------------------|----------------------|------------------------------|-------------------------|
| <b>General data</b>            |                      |                      |                      |                              |                         |
| Sample n°                      | 251/632<br>(0.40)    | 135/632<br>(0.21)    | 246/632<br>(0.39)    | -                            | 632/632<br>(1)          |
| RSV +                          | 155/251<br>(0.62)    | 80/135<br>(0.59)     | 117/246<br>(0.48)    | <b>0.003</b>                 | 352/632<br>(0.56)       |
| RSV -                          | 96/251<br>(0.38)     | 55/135<br>(0.41)     | 129/246<br>(0.52)    |                              | 280/632<br>(0.44)       |
| Flu +                          | 27/632<br>(0.11)     | 6/135<br>(0.04)      | 14/246<br>(0.06)     | -                            | 47/632<br>(0.07)        |
| RSV+ deaths                    | 6/251<br>(0.04)      | 5/135<br>(0.06)      | 3/246<br>(0.03)      | 0.42 <sup>1</sup>            | 14/352<br>(0.04)        |
| Subtyped samples               | 141/251<br>(0.91)    | 78/135<br>(0.98)     | 113/246<br>(0.97)    | -                            | 332/352<br>(0.94)       |
| <b>Subtypes</b>                |                      |                      |                      |                              |                         |
| RSV-A                          | 58/141<br>(0.41)     | 14/78<br>(0.18)      | 108/113<br>(0.96)    | <b>&lt;0.001<sup>1</sup></b> | 180/332<br>(0.54)       |
| RSV-B                          | 80/141<br>(0.57)     | 63/78<br>(0.81)      | 4/113<br>(0.04)      |                              | 147/332<br>(0.44)       |
| RSV-A and RSV-B                | 3/141<br>(0.02)      | 1/78<br>(0.01)       | 1/113<br>(0.01)      |                              | 5/332<br>(0.02)         |
| <b>Demographic data (RSV+)</b> |                      |                      |                      |                              |                         |
| Median age (months)            | 4 (1-12.0)           | 4 (1-10.5)           | 3 (1-8.0)            | 0.793                        | 4 (1-11.0)              |
| <b>Gender</b>                  |                      |                      |                      |                              |                         |
| Male                           | 72/155<br>(0.46)     | 49/80<br>(0.61)      | 61/117<br>(0.52)     | 0.098                        | 182/352<br>(0.52)       |
| Female                         | 83/155<br>(0.54)     | 31/80<br>(0.39)      | 56/117<br>(0.48)     |                              | 170/352<br>(0.48)       |
| <b>Race</b>                    |                      |                      |                      |                              |                         |
| White                          | 61/122<br>(0.50)     | 26/66<br>(0.39)      | 31/97<br>(0.32)      | <b>0.039<sup>1</sup></b>     | 118/285<br>(0.41)       |
| Brown                          | 53/122<br>(0.43)     | 38/66<br>(0.58)      | 64/97<br>(0.66)      |                              | 155/285<br>(0.54)       |

|            |                 |                |                |                  |
|------------|-----------------|----------------|----------------|------------------|
| Black      | 7/122<br>(0.06) | 1/66<br>(0.02) | 2/97<br>(0.02) | 10/285<br>(0.04) |
| Yellow     | 1/122<br>(0.01) | 1/66<br>(0.02) | 0              | 2/285<br>(0.01)  |
| Undeclared | 33              | 14             | 19             | 66               |

<sup>1</sup> Fisher's exact test.

229

230

231

232

233

234

235

236

237

238

239

Table 2 shows patients' clinical features by RSV+ and subtypes. The most frequent symptom reported was cough (93%, 318/341), followed by respiratory distress (88%, 269/307), and fever (86%, 288/336). 74% (252/342) of children needed oxygen therapy and 38% (95/252) of these required mechanical ventilation. The median hospitalization time was 8 (6-14 IQR) days. Intensive care was needed for 61% (202/333) of patients and the median number of days in ICU was 6 (3-10 IQR).

**Table 2.** Summary of clinical and epidemiological data by RSV+ and each subtype. Statistically significant values are highlighted in bold.

|                                       | RSV+<br>2016-2018 |                   | Subtypes          |                   |
|---------------------------------------|-------------------|-------------------|-------------------|-------------------|
|                                       | n (%)             | RSV-A             | RSV-B             | <i>p-value</i>    |
| <b>Demographic profile</b>            |                   |                   |                   |                   |
| Sample number                         | 352               | 180               | 147               |                   |
| Deaths RSV+                           | 14/352<br>(0.04)  | 3/180<br>(0.02)   | 8/147<br>(0.05)   | 0.07 <sup>1</sup> |
| <b>Age</b>                            |                   |                   |                   |                   |
| Median age: months (IQR) <sup>2</sup> | 4 (1-11)          | 4 (1-10.0)        | 4 (1-12.5)        | 0.78              |
| <b>Gender</b>                         |                   |                   |                   |                   |
| Male (%)                              | 182/352<br>(0.52) | 92/180<br>(0.51)  | 78/147<br>(0.53)  | 0.725             |
| Female (%)                            | 170/352<br>(0.48) | 88/180<br>(0.49)  | 69/147<br>(0.47)  |                   |
| <b>Clinical profile</b>               |                   |                   |                   |                   |
| Fever                                 | 288/336<br>(0.86) | 147/174<br>(0.84) | 124/139<br>(0.89) | 0.223             |
| Cough                                 | 318/341<br>(0.93) | 162/176<br>(0.92) | 134/142<br>(0.94) | 0.418             |
| Dyspnea                               | 251/331<br>(0.76) | 135/172<br>(0.78) | 97/136<br>(0.71)  | 0.148             |
| O <sub>2</sub> saturation ≤ 95%       | 169/277<br>(0.61) | 101/150<br>(0.67) | 56/109<br>(0.51)  | <b>0.009</b>      |
| Respiratory distress                  | 269/307<br>(0.88) | 154/167<br>(0.92) | 96/120<br>(0.80)  | <b>0.002</b>      |



|                               |                   |                   |                  |             |
|-------------------------------|-------------------|-------------------|------------------|-------------|
| O <sub>2</sub> Therapy        | 252/342<br>(0.74) | 138/177<br>(0.78) | 98/143<br>(0.68) |             |
| <i>Invasive</i>               | 95/252<br>(0.38)  | 56/138<br>(0.41)  | 33/98<br>(0.34)  | 0.092       |
| <i>Noninvasive</i>            | 157/252<br>(0.62) | 82/138<br>(0.59)  | 65/98<br>(0.66)  |             |
| Intensive Care                | 202/333<br>(0.61) | 113/168<br>(0.67) | 78/142<br>(0.55) | <b>0.03</b> |
| Median hospitalization days   | 8 (6-14)          | 9 (6-15)          | 8 (5-14.0)       | 0.15        |
| Median days in Intensive Care | 6 (3-10)          | 7 (4-11.0)        | 6 (3-9)          | 0.13        |

<sup>1</sup> Fisher's exact test.

<sup>2</sup> IQR: interquartil range.

240  
241 When compared to RSV-B, patients affected by RSV-A showed a higher  
242 frequency of respiratory distress (92% vs 80%, p=0.002), more often manifested O<sub>2</sub>  
243 saturation  $\leq$ 95% (67% vs 51%, p=0.009) and higher requirement for intensive care (67%  
244 vs 55%, p=0.03). Our data also indicate that patients affected by RSV-A stayed one day  
245 longer in hospital and in intensive care units than those affected by RSV-B, however these  
246 data were not statistically significant. Lastly, RSV-A viral load showed more than twice  
247 the number of virus copies per cell (median=57.41 copies/cell) than RSV-B  
248 (median=27.35 copies/cell). RSV-A CSS median was 4 and RSV-B's was 3, and children  
249 infected by RSV-A were most frequently classified in higher severity scores than those  
250 infected by RSV-B (**Table 3**). S4 Table shows the difference in severity by ethnicity.

251  
252 **Table 3.** Clinical Severity Score (CSS): score varied between 0 and 5. Higher values represented  
253 more severe illness. Need for ICU, O<sub>2</sub> $\leq$ 95%, length in hospital >5 days and requirement of O<sub>2</sub> therapy  
254 accounted for 1 point each. Need for mechanical ventilation accounted for 2 points. Patients infected with  
255 RSV-A were most commonly classified into the most severe scores. Difference between viral loads was  
256 not related to severity, but there was no statistical significance.

| Clinical Severity Score (CSS) |                |                |                |                         |    |                |
|-------------------------------|----------------|----------------|----------------|-------------------------|----|----------------|
| CSS                           | RSV-A<br>n (%) | RSV-B<br>n (%) | <i>p-value</i> | Viral load median (IQR) | n  | <i>p-value</i> |
| <b>0</b>                      | 1 (1%)         | 10 (15%)       |                | 54.06 (6.12-603.61)     | 8  |                |
| <b>1</b>                      | 8 (8%)         | 8 (12%)        | <b>0,003</b>   | 217.41 (96.38-370.56)   | 9  | 0.089          |
| <b>2</b>                      | 19 (20%)       | 11 (17%)       |                | 41.18 (6.53-112.59)     | 16 |                |

|          |          |          |                     |    |
|----------|----------|----------|---------------------|----|
| <b>3</b> | 14 (15%) | 15 (23%) | 17.31 (6.33-125.40) | 14 |
| <b>4</b> | 26 (27%) | 9 (14%)  | 12.05 (4.32-36.63)  | 9  |
| <b>5</b> | 28 (29%) | 13 (20%) | 11.81 (1.14-54.24)  | 18 |

257

## 258 **Viral load**

259 A total of 156 (44%) samples were submitted to the viral load analysis (**Table 4**).

260 According to age, median viral load was higher in children with 4 to 6 months old (63.0

261 cop/cell,  $p=0.007$ ). Regarding patient clinical conditions, we found lower viral load in

262 patients with fever (26.15 cop/cell) than those without it (111.29 cop/cell;  $p=0.00$ ) and

263 higher viral load (70.24 cop/cell) in patients without need for oxygen therapy (22.69

264 cop/cell;  $p=0.02$ ). Deceased patients had lower viral load (2.80 cop/cell;  $p=0.02$ ) in

265 comparison to the others (37.96 cop/cell). Although lacking statistical support ( $p=0.089$ ),

266 a noteworthy observation is the tendency of lower viral load in patients with elevated

267 CSS. The viral load analysis was performed regardless of time between symptom onset

268 and date of collection, which, in theory, could alter the interpretation. However, of 156

269 samples used to measure viral titers, only 26 (16%) were collected 7 days after symptoms

270 onset. A segmented analysis revealed very similar results when only samples collected

271 until the 7th day of symptom onset were used. Therefore, we prefer to keep late collection

272 patients in the analysis.

273

274 **Table 4.** Comparison of viral load values between gender, race, age, outcome and clinical condition.  
275 Statistically significant p-values are highlighted in bold.

| <b>Demographic data</b> |                  |          |                      |                          |
|-------------------------|------------------|----------|----------------------|--------------------------|
|                         | <b>Parameter</b> | <b>N</b> | <b>Median (IQR)</b>  | <b>p-value</b>           |
| <b>Gender</b>           | Male             | 78       | 51.40 (8.13-265.31)  | 0.08                     |
|                         | Female           | 78       | 24.63 (4.46-88.29)   |                          |
| <b>Race</b>             | White            | 52       | 54.30 (7.38-207.94)  | 0.09 <sup>1</sup>        |
|                         | Brown            | 63       | 16.70 (4.78-84.83)   |                          |
|                         | Black            | 4        | 52.83 (0.30-241.27)  |                          |
| <b>Age (months)</b>     | 0-3              | 86       | 51.40 (6.12-152.90)  | <b>0.007<sup>1</sup></b> |
|                         | 4-6              | 22       | 63.09 (32.12-211.67) |                          |

|                                       |                          |     |                       |                    |                     |
|---------------------------------------|--------------------------|-----|-----------------------|--------------------|---------------------|
|                                       | 7-12                     | 21  | 39.29 (2.32-236.91)   |                    |                     |
|                                       | >12                      | 26  | 7.77 (1.72-36.92)     |                    |                     |
| <b>Outcome</b>                        | Recovery                 | 130 | 37.96 (6.72-122.71)   | <b>0.02</b>        |                     |
|                                       | Death                    | 7   | 2.80 (0.04-21.49)     |                    |                     |
| <b>Clinical data</b>                  |                          |     |                       |                    |                     |
| <b>Fever</b>                          | Yes                      | 121 | 26.15 (4.33-104.46)   | <b>0.00</b>        |                     |
|                                       | No                       | 27  | 111.29 (51.80-408.21) |                    |                     |
| <b>Cough</b>                          | Yes                      | 144 | 41.53 (4.86-148.15)   | 0.59               |                     |
|                                       | No                       | 7   | 11.52 (7.98-106.29)   |                    |                     |
| <b>Dyspnea</b>                        | Yes                      | 106 | 37.96 (3.91-154.88)   | 0.69               |                     |
|                                       | No                       | 40  | 42.05 (8.58-120.16)   |                    |                     |
| <b>O<sub>2</sub> saturation ≤ 95%</b> | Yes                      | 71  | 26.41 (3.95-150.65)   | 0.40               |                     |
|                                       | No                       | 51  | 50.16 (8.36-196.81)   |                    |                     |
| <b>Respiratory distress</b>           | Yes                      | 115 | 39.29 (4.78-150.13)   | 0.27               |                     |
|                                       | No                       | 18  | 75.69 (12.66-214.26)  |                    |                     |
| <b>Days of hospitalization</b>        | 1-4                      | 20  | 79.36 (11.10-245.08)  | 0.20 <sup>1</sup>  |                     |
|                                       | 5-8                      | 49  | 39.45 (11.89-176.21)  |                    |                     |
|                                       | >8                       | 54  | 24.42 (4.08-78.04)    |                    |                     |
| <b>Ventilatory support</b>            | No                       | 48  | 70.24 (11.41-342.96)  | <b>0.02</b>        |                     |
|                                       | <i>Yes (total)</i>       |     | 22.69                 |                    |                     |
|                                       | <i>Yes - noninvasive</i> |     | 65                    |                    | 26.41 (6.26-105.11) |
|                                       | <i>Yes - invasive</i>    |     | 40                    |                    | 17.31 (3.95-68.70)  |
| <b>Intensive Care</b>                 | Yes                      | 82  | 30.01 (4.41-113.44)   | 0.73               |                     |
|                                       | No                       | 67  | 39.29 (6.90-154.61)   |                    |                     |
| <b>Days of Intensive Care</b>         | 1-4                      | 20  | 34.74 (3.60-226.28)   | 0.547 <sup>1</sup> |                     |
|                                       | 5-8                      | 16  | 16.27 (2.09-106.22)   |                    |                     |
|                                       | >8                       | 24  | 36.24 (9.10-106.65)   |                    |                     |
| <b>Days of symptom until collect</b>  | 0-3                      | 51  | 36.63 (5.99-220.48)   | 0.19 <sup>1</sup>  |                     |
|                                       | 4-6                      | 67  | 39.98 (7.65-135.24)   |                    |                     |
|                                       | 7-9                      | 24  | 19.98 (0.53-77.39)    |                    |                     |
|                                       | >9                       | 12  | 10.45 (3.92-50.98)    |                    |                     |
| <b>Subtype</b>                        | RSV-A                    | 64  | 57.41                 | <b>0.03</b>        |                     |
|                                       | RSV-B                    | 76  | 27.35                 |                    |                     |

<sup>1</sup> Kruskal-Wallis test.

<sup>2</sup> IQR: interquartil range.

276

## 277 **Viral seasonality and climatic analysis**

278 In 2016 and 2017, RSV season started in the 12<sup>th</sup> EW (March, early fall season),  
279 peaked between the 16<sup>th</sup>–20<sup>th</sup> EW and ended in the winter season, between the 31<sup>th</sup>–32<sup>th</sup>  
280 EW (**Fig 1; S5 Table**). In 2018, the beginning of RSV seasonality was anticipated, with  
281 the first cases occurring in 3<sup>th</sup> EW, (January, in the middle of summer). Peak happened in

282 14<sup>th</sup> EW and the end occurred in 27<sup>th</sup> EW. Thus, the RSV seasonal period in 2016, 2017  
283 and 2018 lasted 20, 19 and 24 weeks, respectively.

284

285 **Fig 1. Circulation of RSV-A and RSV-B between 2016 and 2018 in Espirito Santo State.** The X-axis  
286 shows the epidemiological weeks (EW) for each year. The primary Y axis displays the number of positive  
287 cases for each of the subtypes and the secondary Y axis shows the values of the climatic variables. The gray  
288 zone indicates the total number of samples tested in each EW.

289

290 Precipitation rate and relative humidity percentage have not been shown to  
291 influence the distribution of RSV cases by Spearman's correlation test ( $p=0.55$  and  $0.11$ ,  
292 respectively). The mean temperature, however, showed a minor and inverse correlation  
293 with RSV infections ( $-0.16$ ;  $p=0.05$ ).

294 Although RSV-A and RSV-B co-circulated in each year, it is noteworthy that the  
295 subtype distribution changed over the years. In 2016, RSV-B predominated ( $n=80$ ;  $58\%$ )  
296 over RSV-A ( $n=58$ ;  $42\%$ ). In 2017 this difference increased, and RSV-B was responsible  
297 for  $82\%$  of the cases ( $n=63$ ). Finally, in 2018, there was a shift in this pattern and almost  
298 all RSV cases were caused by RSV-A ( $n=108$ ;  $96\%$ ).

299

## 300 **Phylogeny of RSV and genetic analysis.**

301 The phylogenetic reconstructions revealed 36 RSV-A classified such as GA2.  
302 ON1 genotype, and 21 RSV-B, BA genotype, based on 2<sup>nd</sup> HVR (**S1 and S2 Figs**). Some  
303 local genetic groups of both genotypes and a slightly higher diversity among the RSV-A  
304 strains ( $p$ -distance= $1.8\%$ ) were observed in comparison to RSV-B ( $p$ -distance= $1.6\%$ )  
305 (**Figs 2 and 3**).

306

307 **Fig 2. RSV-A phylogenetic tree.** The tree was built using maximum likelihood method on MEGA 6.0  
308 software from a MUSCLE alignment of G gene sequences of 711 bp. Previously published sequences from  
309 known genotypes were retrieved from NCBI database. The ES strains that were sequenced in this work are  
310 highlighted in bold. Numbers from 1 to 5 within the squares indicate the patients' CSS. The cross indicates

311 patients who died due to RSV infection. The stars indicate viral load, categorized by color (in copies per  
312 cell).  
313

314 **Fig 3. RSV-B phylogenetic tree.** The tree was built using maximum likelihood method on MEGA 6.0  
315 software from a MUSCLE alignment of G gene sequences of 726 bp. Previously published sequences from  
316 known genotypes were retrieved from NCBI database. The ES strains that were sequenced in this work are  
317 highlighted in bold. Numbers from 1 to 5 within the squares indicate the patients' CSS. The cross indicates  
318 patients who died due to RSV infection. The stars indicate viral load, categorized by color (in copies per  
319 cell).  
320

321 RSV-A ES Brazilian strains, from 2016 to 2018, are clustered with strains that  
322 circulated in North America, South America, Asia, Africa and Oceania, from 2011 to  
323 2018. A Brazilian main local cluster BR.1 (L142S, L274P, Y304H and T320A) was  
324 observed circulating from 2016 to 2018 in ES state. However two new subclusters, BR.1.1  
325 (E106G,) and BR.1.2 (N103T, S144I, E224V, S270P and/or P298L) were detected co-  
326 circulating in ES state in 2018. Amino acid substitutions compared with the RSV-A  
327 GA2.ON1 reference strain (JN257693) can be observed in the **S6 Table**. The average  
328 CSS inside BR.1 cluster was 2.84, while the average in the rest of BR strains was 3.78,  
329 showing that BR.1 cluster may be associated with lower severity disease than the other  
330 strains. Viral load seemed to be higher on BR.1 strains when compared to other Brazilian  
331 strains.

332 RSV-B gene G phylogenetic reconstruction (**Fig 3**) revealed that Brazilian strains  
333 from 2016 to 2018 belonged to a cluster containing global strains circulating from 1999  
334 to 2018. ES Brazilian strains were distributed through this main cluster and presented  
335 punctual amino acid substitutions, some of them with potential loss of O-glycosylation,  
336 such as T229N and/or S287F (strains from 2017). Inside the main cluster, some local  
337 subclusters were observed, such as BR.1 (S101G loss glycosylation site, P217L and  
338 T248A loss glycosylation site) e BR.2 (G136S and S269P) in samples from 2016,  
339 revealing the large diversity among RSV-B virus circulating in the ES State during that  
340 year. Additionally two strains from 2017 presented an insertion of tree nucleotides at

341 codon 228. All these amino acid substitutions compared with the RSV-B BA reference  
342 strain (AY333364) are described in **S7 Table**. CSS and viral load data were unavailable  
343 for most of RSV-B sequences, therefore, we could not compare those data with the  
344 genetic strains observed.

## 345 **Discussion**

346 In this paper we investigated RSV features using Brazilian Influenza Surveillance  
347 Program and addressed some RSV issues listed in the WHO global RSV surveillance  
348 pilot objectives [16], such as RSV burden in hospitalized children and mapping of local  
349 seasonality. Additionally, we describe the molecular characteristics of gene G and it  
350 revealed RSV-A and RSV-B local clusters co-circulating in Brazil.

351

### 352 **RSV is prevalent in Brazilian children with SARI.**

353 RSV prevalence in different Brazilian regions is highly diverse, ranging from 7.7% to  
354 77.6% [25–27]. In the ES state, from 2016 to 2018, the prevalence in hospitalized children  
355 up to 3 years-old was 56%. These differences are probably related to the use of diverse  
356 methods of RSV detection (*e.g.* RT-PCR or immunofluorescence) or patient inclusion  
357 criteria (*e.g.* age, symptoms, period of the year). During 1997-98 season, Checon *et al.*  
358 found a prevalence of 28% in the capital of ES State [27]. This lower prevalence in  
359 comparison to our study can be attributed to the less sensitive method used  
360 (immunofluorescence) and a broader target population age (children  $\leq$  5 years old).

361 In our study, the median age of four months in hospitalized children with RSV  
362 confirms the higher prevalence in children younger than one year old [2], which justifies  
363 why RSV vaccine candidates are aiming to protect, primarily, infants and young children  
364 [7].

365

366 **The subtype but not the viral load appears to be associated with**  
367 **disease severity.**

368 RSV infection can cause a range of clinical outcomes [2], but factors attributed to a worst  
369 outcome remain unclear [3,4]. Several studies have shown that male gender is a risk  
370 factor for a RSV infection [2], while others have not observed such a connection [28].  
371 Although without statistical significance, we observed that male children were slightly  
372 more affected than female, which could support the hypothesis that male children are at  
373 higher risk. Nevertheless, the CSS median was three for both genders.

374 Some evidences suggest that Afro-descendant children are more resistant to RSV  
375 infection than white children. [28]. In contrast, in our study, brown and black children  
376 stayed longer periods in hospital and ICU, had lower oxygen saturation and used oxygen  
377 therapy and mechanical ventilation more often than white children (**S4 Table**). In  
378 addition, the prevalence of SARI caused by RSV was higher in Brazilian brown children  
379 (54%). However, it is important to consider that miscegenation of Brazilian population  
380 shows a high degree of ancestry heterogeneity both for mitochondrial and genomic DNA  
381 [29]. According to the Brazilian Institute of Geography and Statistics (IBGE), blacks and  
382 browns make up for the majority of the poverty group in Brazil [30]. RSV lethality  
383 appears to be, at least in part, associated with socio-economic conditions, since the  
384 lethality of RSV infection in developing countries is seven fold the rate in industrialized  
385 countries [31]. Low income implies less access to basic conditions and health services,  
386 which may explain our findings.

387 Although some authors have found no correlation between subtypes and disease  
388 severity [32,33], many others revealed RSV-A as the most virulent subtype  
389 [9,10,12,34,35]. We have found that children hospitalized due to SARI with RSV-A

390 infection revealed a higher clinical score index (CSS median=4) – therefore, a more  
391 severe disease – when compared to those with RSV-B (CSS median=3). Children infected  
392 by RSV-A required O<sub>2</sub> therapy more often than those infected by RSV-B and, of all  
393 children who needed O<sub>2</sub> therapy, those affected by subgroup A needed mechanical  
394 ventilation more frequently. Although these data did not have statistical support, other  
395 studies found the same connection [9,10]. Our data also shows that children infected by  
396 subgroup A required ICU more often (p=0.03) and remained hospitalized and in ICU a  
397 day longer, on average, when compared to those infected by RSV-B, which is agreement  
398 with previous studies [35,36]. Notwithstanding, we highlight that only one genotype was  
399 found for each subtype (ON1 and BA), thus, those differences in severity could be a  
400 consequence of differences in genotypes virulence, rather than subtypes.

401         The correlation between disease severity and viral load remains controversial.  
402 While several authors have shown that the severity of the infection follows the viral load  
403 [37,4,5,38], others have not [7,12,33]. Some studies found associations between viral load  
404 and symptom frequency , but not severity itself [39,40]. Viral load measurement methods  
405 are widely variable between studies: some authors use plaque assay [4] or semi-  
406 quantitative analyses, such as ct [5,7,32], others use quantitative methods [38–41].  
407 Moreover, most studies that use quantitative methods do not normalize the measurements.  
408 Respiratory samples are naturally heterogeneous and the collection technique can  
409 influence viral genome concentration [38].

410         In this study we used a standardized method for measuring viral load.  
411 Interestingly, we found lower viral load in patients with fever (p=0.00), with need of  
412 ventilatory support (p=0.02) and in those who died (p=0.02). Our data are in conflict with  
413 previous studies that demonstrated a positive association between viral load and the  
414 presence of cough, fever [39] and the need for intubation [37]. However, two recent



415 studies observed higher viral load in less severe RSV disease [42,43]. Piedra *et al.*  
416 observed a positive correlation between viral load and mucosal concentration of  
417 proinflammatory cytokines that may suggest that high RSV loads can protect from disease  
418 progression due to the promotion of an early robust innate immune response [42,43].  
419 Conflicting results between studies could be attributed to the different methods used to  
420 calculate viral load, various study designs and indicators of disease severity.

421

422 **The seasonal period of RSV may fluctuate and its circulation is**  
423 **slightly associated with temperature.**

424 In temperate countries, RSV peak activity occurs in the winter and several studies have  
425 shown the connection between cold temperatures and viral circulation [44]. In contrast,  
426 in tropical countries there is a wide range of variability in the timing and duration of  
427 epidemics and the correlation between climatic factors and viral activity is controversial  
428 [21,45]. Although in the Southern Hemisphere RSV wave usually starts between March  
429 and June and decreases between August and October [21], in Brazil, a continental country  
430 with five geographic regions, a wide variation in the seasonality is seen, such as those  
431 observed in northeastern [46] and southern [47] regions.

432 Here we showed that RSV's activity were very similar between 2016 and 2017  
433 seasons, with the circulation onset occurring in March (EW 12) and end in July/August  
434 (EW 31-32), during the winter season. These data are in accord with the Brazilian Society  
435 of Pediatrics, which recommends the administration of Palivizumab from February to  
436 July [48]. Nonetheless, in 2018, we observed an anticipation of the seasonality onset by  
437 nine weeks, with the beginning of circulation occurring in January (summer season) and  
438 with the end taking place in the Fall instead of Winter.

439 In the southeastern region it was observed that RSV peak usually happens in early  
440 April [49]. Our data shows that in 2016 the RSV peak occurred in May, suggesting subtle  
441 differences even inside the same geographical region. In 2018 there was an extension of  
442 RSV's seasonality duration by 4.5 weeks when compared to the average in 2016-2017.  
443 Those observations are especially worrisome, since major variations could make a  
444 preventive measure harder to implement. Understanding local epidemics is important in  
445 managing time of prophylaxis, to support vaccine development and to follow morbidity  
446 and mortality caused by RSV infection [44], thus, establishing RSV surveillance in real  
447 time may allow for the identification of patterns and possible variation in prophylaxis  
448 time. RSV seasonality usually lasts five to six months [21]. In our study, the longest  
449 seasonal period occurred in 2018 (6 months), followed by 2016 (5 months) and 2017  
450 (4.75 months). Interestingly, the prevalence of RSV-A was high in 2018 (96%), medium  
451 in 2016 (41%) and low in 2017 (18%). These data reinforce the theory that RSV-A may  
452 lengthen the seasonality [50].

453 Climatic factors, such as humidity, rainfall and temperature have been assumed to  
454 impact RSV seasonality [44,51]. However, this association remains controversial. An  
455 inverted correlation between RSV circulation, temperature and humidity was observed in  
456 a Brazilian study, carried out in São Paulo State [52]. In this study, a minor correlation  
457 was found between temperature decrease and case number increase. However, no  
458 correlation was found concerning humidity or precipitation.

459

### 460 **ON1 and BA were the only genotypes detected.**

461 All RSV-A isolates were ON1 genotype and all RSV-B were BA, which confirm the fast-  
462 global dissemination of RSV with nucleotide duplication. These findings are consistent

463 with recent published reports performed in other countries, such as Philippines [53],  
464 Kenya [54], Italy [55], USA and Puerto Rico [56].

465 Overall p-distance during the study period in RSV-A was 1.8%. A recent study  
466 observed an overall p-distance of 1.4% within ON1 [13]. A noteworthy observation is the  
467 fact that in 2017 we found the lowest prevalence of RSV-A in ES (18%), and, still, the  
468 highest genetic diversity. Phylogeny showed that 2017 strains were distributed in almost  
469 all genetic clusters, which showed high diversity that year. RSV-A phylogenetic analysis  
470 revealed ongoing genetic changes, with BR.1 grouping most recent strains, suggesting  
471 that BR.1 strains may be under positive selective pressure. Changes in the circulation of  
472 RSV strains have been considered a mechanism for evading immune response generated  
473 by previous strains, which possibly allows for re-infections to occur [57].

474 As demonstrated, in 2018 RSV-B was responsible for only 4% of cases.  
475 Therefore, phylogenetic analysis did not include any RSV-B samples from that year.  
476 Older strains, from 2009 to 2014, are positioned at the base of the BA cluster, however,  
477 sample strains collected between 2015 and 2018 did not form genetic groups related to  
478 the year of collection. This observation may suggest an absence of positive pressure.

479 Although we found clusters composed exclusively of ES samples, it is necessary  
480 to expand the sequencing of RSV samples globally in order to verify if there is in fact the  
481 formation of local genetic groups or if the observation is caused by a sample bias.

482 Previous studies show that a large part of the genetic variability between RSV  
483 strains comes from changes in O-glycosylation profile and that this may be associated  
484 with an evolutionary mechanism of immune response evasion [59]. Here, we investigated  
485 and listed strain amino acid substitutions and also those shared within and between  
486 clusters. However, we did not carry out in-depth analysis in order to understand the role  
487 of these mutations, therefore, our objective was purely observational. Among the

488 mutations found, one of the most interesting was the insertion of three nucleotides at codon  
489 228 in RSV-B. Further studies are essential to understand virus evolution and  
490 pathogenicity mutation consequences.

491         Limitations of this study include the fact that the majority of patients had an acute  
492 infection, thus, the prevalence found refers only to SARI, and the absence of a mild  
493 infection group prevents further analysis of severity influencing factors. Lastly, clinical  
494 data were taken from notification forms, which often show inconsistencies and missing  
495 data. Despite those caveats, we believe the data provide valuable epidemiological, genetic  
496 and clinical information on RSV.

497

## 498 **Conclusion**

499         In this study we observed a high prevalence of RSV in children under three years  
500 old even when using the Brazilian Influenza Surveillance Program. This result is  
501 important because it shows that the establishment of global RSV surveillance within the  
502 Influenza surveillance system allows for the detection of a large number of cases. Our  
503 data suggest that RSV-A is, in fact, more virulent than RSV-B. Notably, no correlation  
504 between viral load and disease severity was observed. The observation of an important  
505 anticipation of the seasonal period is worrisome, since this can make it difficult to  
506 administer prophylactic measures at the right time, however, it is necessary to expand the  
507 historical series of seasonality in Espirito Santo. The average temperature was the only  
508 climatic factor to show interference with the viral circulation. Our data show the annual  
509 co-circulation of RSV-A and RSV-B, however, with considerable fluctuations in the  
510 prevalence of subtypes. ON1 and BA were the only ones found in the studied period,  
511 which corroborates with a series of recent studies. The establishment of a global and

512 standardized real time RSV surveillance may allow for the collection of data that will  
513 help understanding the complex mechanisms of viral evolution and will facilitate the  
514 development of future vaccines and antiviral drugs. RSV continues to lead the cause of  
515 hospitalizations for pneumonia in children worldwide, being responsible for a large  
516 fraction of morbidity and mortality in the pediatric population.

517

## 518 **Acknowledgments**

519 We would like to thank Liliana Cruz Spano for her significant theoretical and  
520 experimental support to this work, all researchers who upload genetic sequences in the  
521 public genetic database – GenBank, patients, parents and guardians, the Espirito Santo  
522 State Health Department and the Brazilian Ministry of Health, represented by the  
523 Influenza Technical Group.

524

## 525 **References**

- 526 1. Hall CB, Weinberg GA, Iwane MK, Blumkin AK, Edwards KM, Staat MA, et al.  
527 The Burden of Respiratory Syncytial Virus Infection in Young Children. *N Engl J*  
528 *Med.* 2009;360: 588–598. doi:10.1056/NEJMoa0804877
- 529 2. Borchers AT, Chang C, Gershwin ME, Gershwin LJ. Respiratory Syncytial Virus  
530 —A Comprehensive Review. *Clin Rev Allergy Immunol.* 2013;45: 331–379.  
531 doi:10.1007/s12016-013-8368-9
- 532 3. Collins PL, Graham BS. Viral and Host Factors in Human Respiratory Syncytial  
533 Virus Pathogenesis. *J Virol.* 2008;82: 2040–2055. doi:10.1128/JVI.01625-07
- 534 4. El Saleeby CM, Bush AJ, Harrison LM, Aitken JA, DeVincenzo JP. Respiratory  
535 Syncytial Virus Load, Viral Dynamics, and Disease Severity in Previously Healthy  
536 Naturally Infected Children. *J Infect Dis.* 2011;204: 996–1002.  
537 doi:10.1093/infdis/jir494
- 538 5. Hasegawa K, Jartti T, Mansbach JM, Laham FR, Jewell AM, Espinola JA, et al.  
539 Respiratory Syncytial Virus Genomic Load and Disease Severity Among Children

- 540 Hospitalized With Bronchiolitis: Multicenter Cohort Studies in the United States  
541 and Finland. *J Infect Dis.* 2015;211: 1550–1559. doi:10.1093/infdis/jiu658
- 542 6. Resa C, Magro S, Marechal P, Barranger C, Joannes M, Miszczak F, et al.  
543 Development of an efficient qRT-PCR assay for quality control and cellular  
544 quantification of respiratory samples. *J Clin Virol.* 2014;60: 270–275.  
545 doi:10.1016/j.jcv.2014.03.019
- 546 7. Mazur NI, Higgins D, Nunes MC, Melero JA, Langedijk AC, Horsley N, et al. The  
547 respiratory syncytial virus vaccine landscape: lessons from the graveyard and  
548 promising candidates. *Lancet Infect Dis.* 2018;18: e295–e311. doi:10.1016/S1473-  
549 3099(18)30292-5
- 550 8. Mufson MA, Orvell C, Rafnar B, Norrby E. Two Distinct Subtypes of Human  
551 Respiratory Syncytial Virus. *J Gen Virol.* 1985;66: 2111–2124.  
552 doi:https://doi.org/10.1099/0022-1317-66-10-2111
- 553 9. McConnochie KM, Hall CB, Walsh EE, Roghmann KJ. Variation in severity of  
554 respiratory syncytial virus infections with subtype. *J Pediatr.* 1990;117: 52–62.  
555 doi:10.1016/S0022-3476(05)82443-6
- 556 10. Walsh EE, McConnochie KM, Long CE, Hall CB. Severity of Respiratory  
557 Syncytial Virus Infection Is Related to Virus Strain. *J Infect Dis.* 1997;175: 814–  
558 820. doi:10.1086/513976
- 559 11. Hornsleth A, Klug B, Nir M, Johansen J, Hansen K, Christensen L, et al. Severity  
560 of respiratory syncytial virus disease related to type and genotype of virus and to  
561 cytokine values in nasopharyngeal secretions. *Pediatr Infect Dis J.* 1998;17: 1114–  
562 1121. doi:10.1097/00006454-199812000-00003
- 563 12. Kim Y-I, Murphy R, Majumdar S, Harrison LG, Aitken J, DeVincenzo JP.  
564 Relating plaque morphology to respiratory syncytial virus subgroup, viral load,  
565 and disease severity in children. *Pediatr Res.* 2015;78: 380–388.  
566 doi:10.1038/pr.2015.122
- 567 13. Muñoz-Escalante JC, Comas-García A, Bernal-Silva S, Robles-Espinoza CD,  
568 Gómez-Leal G, Noyola DE. Respiratory syncytial virus A genotype classification  
569 based on systematic intergenotypic and intragenotypic sequence analysis. *Sci Rep.*  
570 2019;9: 20097. doi:10.1038/s41598-019-56552-2
- 571 14. Trento A, Viegas M, Galiano M, Videla C, Carballal G, Mistchenko AS, et al.  
572 Natural History of Human Respiratory Syncytial Virus Inferred from Phylogenetic  
573 Analysis of the Attachment (G) Glycoprotein with a 60-Nucleotide Duplication. *J*  
574 *Virol.* 2006;80: 975–984. doi:10.1128/JVI.80.2.975-984.2006
- 575 15. Eshaghi A, Duvvuri VR, Lai R, Nadarajah JT, Li A, Patel SN, et al. Genetic  
576 Variability of Human Respiratory Syncytial Virus A Strains Circulating in  
577 Ontario: A Novel Genotype with a 72 Nucleotide G Gene Duplication. *PLoS ONE.*  
578 2012;7: e32807. doi:10.1371/journal.pone.0032807

- 579 16. WHO strategy to pilot global respiratory syncytial virus surveillance based on the  
580 Global Influenza Surveillance and Response System (GISRS). Geneva: World  
581 Health Organization; 2017. Licence: CC BY-NC-SA 3.0 IGO.
- 582 17. Brasil. Panorama do Espírito Santo [cited 27 September 2020]. In Instituto  
583 Brasileiro de Geografia e Estatística (IBGE) [Internet]. Available from:  
584 <https://cidades.ibge.gov.br/brasil/es/panorama>.
- 585 18. Brasil. Gripe (influenza): causas, sintomas, tratamento, diagnóstico e prevenção.  
586 [cited 08 September 2020]. In: Brazilian Ministry of Health [Internet]. Available  
587 from: <https://antigo.saude.gov.br/saude-de-a-z/gripe/#boletins>.
- 588 19. Martinello RA, Chen MD, Weibel C, Kahn JS. Correlation between Respiratory  
589 Syncytial Virus Genotype and Severity of Illness. *J Infect Dis.* 2002;186: 839–842.  
590 doi:10.1086/342414
- 591 20. Álvarez-Argüelles ME, Oña-Navarro M de, Rojo-Alba S, Torrens-Muns M,  
592 Junquera-Llaneza ML, Antonio-Boga J, et al. Quantification of human papilloma  
593 virus (HPV) DNA using the Cobas 4800 system in women with and without  
594 pathological alterations attributable to the virus. *J Virol Methods.* 2015;222: 95–  
595 102. doi:10.1016/j.jviromet.2015.05.016
- 596 21. Obando-Pacheco P, Justicia-Grande AJ, Rivero-Calle I, Rodríguez-Tenreiro C, Sly  
597 P, Ramilo O, et al. Respiratory Syncytial Virus Seasonality: A Global Overview.  
598 2018; 217(9): 1356-1364. doi:10.1093/infdis/jiy056.
- 599 22. Sequencher® - DNA sequence analysis software. Ann Arbor, MI USA: Gene  
600 Codes Corporation;
- 601 23. Tamura K, Stecher G, Peterson D, Filipski A, Kumar S. MEGA6: Molecular  
602 Evolutionary Genetics Analysis Version 6.0. *Mol Biol Evol.* 2013;30: 2725–2729.  
603 doi:10.1093/molbev/mst197
- 604 24. Guindon S, Gascuel O. A Simple, Fast, and Accurate Algorithm to Estimate Large  
605 Phylogenies by Maximum Likelihood. *Syst Biol.* 2003;52: 696–704.  
606 doi:10.1080/10635150390235520
- 607 25. Gardinassi L, Simas P, Gomes D, Bonfim C, Nogueira F, Garcia G, et al. Diversity  
608 and Adaptation of Human Respiratory Syncytial Virus Genotypes Circulating in  
609 Two Distinct Communities: Public Hospital and Day Care Center. *Viruses.*  
610 2012;4: 2432–2447. doi:10.3390/v4112432
- 611 26. Vieira SE, Thomazelli LM, de Paulis M, Ferronato AE, Oliveira DB, Martinez  
612 MB, et al. Infections Caused by HRSV A ON1 Are Predominant among  
613 Hospitalized Infants with Bronchiolitis in São Paulo City. *BioMed Res Int.*  
614 2017;2017: 1–7. doi:10.1155/2017/3459785
- 615 27. Checon RE, Siqueira MM, Lugon AK, Portes S, Dietze R. Short report: seasonal  
616 pattern of respiratory syncytial virus in a region with a tropical climate in  
617 southeastern Brazil. *Am J Trop Med Hyg.* 2002;67: 490–491.  
618 doi:10.4269/ajtmh.2002.67.490

- 619 28. Bradley JP, Bacharier LB, Bonfiglio J, Schechtman KB, Strunk R, Storch G, et al.  
620 Severity of Respiratory Syncytial Virus Bronchiolitis Is Affected by Cigarette  
621 Smoke Exposure and Atopy. *Pediatrics*. 2005;115: e7–e14.  
622 doi:10.1542/peds.2004-0059
- 623 29. Cardena MMSG, Ribeiro-dos-Santos Â, Santos S, Mansur AJ, Pereira AC,  
624 Fridman C. Assessment of the Relationship between Self-Declared Ethnicity,  
625 Mitochondrial Haplogroups and Genomic Ancestry in Brazilian Individuals. *PLoS*  
626 *ONE*. 2013;8: e62005. doi:10.1371/journal.pone.0062005
- 627 30. Brasil. Síntese de Indicadores Sociais: uma análise das condições de vida da  
628 população brasileira [cited 27 September 2020]. In Instituto Brasileiro de  
629 Geografia e Estatística (IBGE) [Internet]. Available from:  
630 <https://biblioteca.ibge.gov.br/visualizacao/livros/liv101629.pdf>.
- 631 31. Nair H, Nokes DJ, Gessner BD, Dherani M, Madhi SA, Singleton RJ, et al. Global  
632 burden of acute lower respiratory infections due to respiratory syncytial virus in  
633 young children: a systematic review and meta-analysis. *Lancet*. 2010;375: 1545–  
634 1555. doi:10.1016/S0140-6736(10)60206-1
- 635 32. Espinosa Y, San Martín C, Torres A, Farfán M, Torres J, Avadhanula V, et al.  
636 Genomic Loads and Genotypes of Respiratory Syncytial Virus: Viral Factors  
637 during Lower Respiratory Tract Infection in Chilean Hospitalized Infants. *Int J*  
638 *Mol Sci*. 2017;18: 654. doi:10.3390/ijms18030654
- 639 33. Rodriguez-Fernandez R, Tapia LI, Yang C-F, Torres JP, Chavez-Bueno S, Garcia  
640 C, et al. Respiratory Syncytial Virus Genotypes, Host Immune Profiles, and  
641 Disease Severity in Young Children Hospitalized With Bronchiolitis. *J Infect Dis*.  
642 2018;217: 24–34. doi:10.1093/infdis/jix543
- 643 34. Tran DN, Pham TMH, Ha MT, Tran TTL, Dang TKH, Yoshida L-M, et al.  
644 Molecular Epidemiology and Disease Severity of Human Respiratory Syncytial  
645 Virus in Vietnam. *PLoS ONE*. 2013;8: e45436. doi:10.1371/journal.pone.0045436
- 646 35. Hall CB, Walsh EE, Schnabel KC, Long CE, McConnochie KM, Hildreth SW, et  
647 al. Occurrence of Groups A and B of Respiratory Syncytial Virus over 15 Years:  
648 Associated Epidemiologic and Clinical Characteristics in Hospitalized and  
649 Ambulatory Children. *J Infect Dis*. 1990;162: 1283–1290.  
650 doi:10.1093/infdis/162.6.1283
- 651 36. Jafri HS, Wu X, Makari D, Henrickson KJ. Distribution of Respiratory Syncytial  
652 Virus Subtypes A and B Among Infants Presenting to the Emergency Department  
653 With Lower Respiratory Tract Infection or Apnea. *Pediatr Infect Dis J*. 2013;32:  
654 335–340. doi:10.1097/INF.0b013e318282603a
- 655 37. DeVincenzo JP, Wilkinson T, Vaishnav A, Cehelsky J, Meyers R, Nochur S, et al.  
656 Viral Load Drives Disease in Humans Experimentally Infected with Respiratory  
657 Syncytial Virus. *Am J Respir Crit Care Med*. 2010;182: 1305–1314.  
658 doi:10.1164/rccm.201002-0221OC
- 659 38. Gómez- Novo M, Boga JA, Álvarez- Argüelles ME, Rojo- Alba S, Fernández A,  
660 Menéndez MJ, et al. Human respiratory syncytial virus load normalized by cell



- 661 quantification as predictor of acute respiratory tract infection. *J Med Virol.*  
662 2018;90: 861–866. doi:10.1002/jmv.25020
- 663 39. Hijano DR, Brazelton de Cardenas J, Maron G, Garner CD, Ferrolino JA, Dallas  
664 RH, et al. Clinical correlation of influenza and respiratory syncytial virus load  
665 measured by digital PCR. *PLoS ONE.* 2019;14: e0220908.  
666 doi:10.1371/journal.pone.0220908
- 667 40. Moreira FB, Rosario CS, Santos JS, Avanzi VM, Nogueira MB, Vidal LR, et al.  
668 Molecular characterization and clinical epidemiology of human respiratory  
669 syncytial virus (HRSV) A and B in hospitalized children, Southern Brazil. *J Med*  
670 *Virol.* 2017;89: 1489–1493. doi:10.1002/jmv.24795
- 671 41. Fodha I, Vabret A, Ghedira L, Seboui H, Chouchane S, Dewar J, et al. Respiratory  
672 syncytial virus infections in hospitalized infants: Association between viral load,  
673 virus subgroup, and disease severity. *J Med Virol.* 2007;79: 1951–1958.  
674 doi:10.1002/jmv.21026
- 675 42. Garcia-Mauriño C, Moore-Clingenpeel M, Thomas J, Mertz S, Cohen DM, Ramilo  
676 O, et al. Viral Load Dynamics and Clinical Disease Severity in Infants With  
677 Respiratory Syncytial Virus Infection. *J Infect Dis.* 2019;219: 1207–1215.  
678 doi:10.1093/infdis/jiy655
- 679 43. Piedra F-A, Mei M, Avadhanula V, Mehta R, Aideyan L, Garofalo RP, et al. The  
680 interdependencies of viral load, the innate immune response, and clinical outcome  
681 in children presenting to the emergency department with respiratory syncytial  
682 virus-associated bronchiolitis. *PLoS ONE.* 2017;12: e0172953.  
683 doi:10.1371/journal.pone.0172953
- 684 44. Haynes AK, Manangan AP, Iwane MK, Sturm-Ramirez K, Homaira N, Brooks  
685 WA, et al. Respiratory Syncytial Virus Circulation in Seven Countries With  
686 Global Disease Detection Regional Centers. *J Infect Dis.* 2013;208: S246–S254.  
687 doi:10.1093/infdis/jit515
- 688 45. Bloom-Feshbach K, Alonso WJ, Charu V, Tamerius J, Simonsen L, Miller MA, et  
689 al. Latitudinal Variations in Seasonal Activity of Influenza and Respiratory  
690 Syncytial Virus (RSV): A Global Comparative Review. *PLoS ONE.* 2013;8:  
691 e54445. doi:10.1371/journal.pone.0054445
- 692 46. Moura FEA, Borges LC, Portes SAR, Ramos EAG, Siqueira MM. Respiratory  
693 syncytial virus infections during an epidemic period in Salvador, Brazil: viral  
694 antigenic group analysis and description of clinical and epidemiological aspects.  
695 *Mem Inst Oswaldo Cruz.* 2003;98: 739–743. doi:10.1590/S0074-  
696 02762003000600005
- 697 47. Straliootto SM, Siqueira MM, Muller RL, Fischer GB, Cunha MLT, Nestor SM.  
698 Viral etiology of acute respiratory infections among children in Porto Alegre, RS,  
699 Brazil. *Rev Soc Bras Med Trop.* 2002;35: 283–291. doi:10.1590/S0037-  
700 86822002000400002

- 701 48. Kfourri RA, Sadeck LSR, Moura AA, Bresolin AC, Miralha AL, Pimentel AM, et  
702 al. Diretrizes para o manejo da infecção causada pelo Vírus Sincicial Respiratório  
703 (VSR). *Soc Bras Pediatr*. 2017; 1–20.
- 704 49. Freitas ARR, Donalisio MR. Respiratory syncytial virus seasonality in Brazil:  
705 implications for the immunisation policy for at-risk populations. *Mem Inst*  
706 *Oswaldo Cruz*. 2016;111: 294–301. doi:10.1590/0074-02760150341
- 707 50. Yu J, Liu C, Xiao Y, Xiang Z, Zhou H, Chen L, et al. Respiratory Syncytial Virus  
708 Seasonality, Beijing, China, 2007–2015. *Emerg Infect Dis*. 2019;25: 1127–1135.  
709 doi:10.3201/eid2506.180532
- 710 51. Zhang H, Wen S, Zheng J, Chen X, Lv F, Liu L. Meteorological factors affecting  
711 respiratory syncytial virus infection: A time- series analysis. *Pediatr Pulmonol*.  
712 2020;55: 713–718. doi:10.1002/ppul.24629
- 713 52. Gardinassi LG, Simas PVM, Salomão JB, Durigon EL, Trevisan DMZ, Cordeiro  
714 JA, et al. Seasonality of viral respiratory infections in Southeast of Brazil: the  
715 influence of temperature and air humidity. *Braz J Microbiol*. 2012;43: 98–108.  
716 doi:10.1590/S1517-83822012000100011
- 717 53. Okamoto M, Dapat CP, Sandagon AMD, Batangan-Nacion LP, Lirio IC, Tamaki  
718 R, et al. Molecular Characterization of Respiratory Syncytial Virus in Children  
719 With Repeated Infections With Subgroup B in the Philippines. *J Infect Dis*.  
720 2018;218: 1045–1053. doi:10.1093/infdis/jiy256
- 721 54. Otieno JR, Kamau EM, Oketch JW, Ngoi JM, Gichuki AM, Binter Š, et al. Whole  
722 genome analysis of local Kenyan and global sequences unravels the  
723 epidemiological and molecular evolutionary dynamics of RSV genotype ON1  
724 strains. *Virus Evol*. 2018;4. doi:10.1093/ve/vey027
- 725 55. Esposito S, Piralla A, Zampiero A, Bianchini S, Di Pietro G, Scala A, et al.  
726 Characteristics and Their Clinical Relevance of Respiratory Syncytial Virus Types  
727 and Genotypes Circulating in Northern Italy in Five Consecutive Winter Seasons.  
728 *PLoS ONE*. 2015;10: e0129369. doi:10.1371/journal.pone.0129369
- 729 56. Bin Lu, Liu H, Tabor DE, Tovchigrechko A, Qi Y, Ruzin A, et al. Emergence of  
730 new antigenic epitopes in the glycoproteins of human respiratory syncytial virus  
731 collected from a US surveillance study, 2015–17. *Sci Rep*. 2019;9: 3898.  
732 doi:10.1038/s41598-019-40387-y
- 733 57. Hall CB. Respiratory Syncytial Virus and Parainfluenza Virus. *N Engl J Med*.  
734 2001;344: 1917–1928. doi:10.1056/NEJM200106213442507
- 735 58. Elawar F, Griffiths CD, Zhu D, Bilawchuk LM, Jensen LD, Forss L, et al. A  
736 Virological and Phylogenetic Analysis of the Emergence of New Clades of  
737 Respiratory Syncytial Virus. *Sci Rep*. 2017;7: 12232. doi:10.1038/s41598-017-  
738 12001-6
- 739 59. Leemans A, Boeren M, Van der Gucht W, Martinet W, Caljon G, Maes L, et al.  
740 Characterization of the role of N-glycosylation sites in the respiratory syncytial

741 virus fusion protein in virus replication, syncytium formation and antigenicity.  
742 Virus Res. 2019;266: 58–68. doi:10.1016/j.virusres.2019.04.006

743

## 744 **Supporting information**

745 **S1 Fig.** RSV-A phylogenetic tree based on 336 bp of the HVR-2 of G gene. The tree was built using  
746 maximum likelihood method on MEGA 6.0 software from a MUSCLE alignment, with some manual  
747 editions. Reference sequences from each described genotype were downloaded from NCBI GenBank and  
748 used in the phylogenetic reconstruction. The genotypes were classified by colors and all ES strains grouped  
749 within the ON1 genotype.

750 **S2 Fig.** RSV-A phylogenetic tree based on 318 bp of the HVR-2 of G gene. The tree was built using  
751 maximum likelihood method on MEGA 6.0 software from a MUSCLE alignment, with some manual  
752 editions. Reference sequences from each described genotype were downloaded from NCBI GenBank and  
753 used in the phylogenetic reconstruction. The genotypes were classified by colors and all ES strains grouped  
754 within the BA genotype.

755 **S1 Table.** Primers, probes and DNA fragments used in the study. “F”, “R” and “P”, represent the sequence  
756 of the forward and reverse primers and the probe, respectively. Synthetic DNA fragment from RSV was  
757 included in a pMA-t vector.

758 **S2 Table.** List of the sequences used to build the phylogeny based on HVR-2 of gene G for both subtypes  
759 RSA-A and RSV-B.

760 **S3 Table.** List of the sequences used to build the phylogeny based on gene G for both subtypes RSV-A and  
761 RSV-B. Collection date of some sequences were unavailable.

762 **S4 Table.** Differences in severity among ethnicities showing that children classified as black or brown  
763 showed O<sub>2</sub> saturation  $\leq$  95% and respiratory distress more often than those classified as white. Also they  
764 required ventilatory support more frequently and stand more time in hospital and in ICU.

765 **S5 Table.** Duration and climatic characteristics of RSV seasonality in the years studied.

766 **S6 Table.** List of amino acid changes in RSV-A. Residues in blue and red show potential losses and gains  
767 of O-glycosylation sites, respectively.

768 **S7 Table.** List of amino acid changes in RSV-B. Residues in blue and red show potential losses and gains  
769 of O-glycosylation sites, respectively.

Figure 1

[Click here to access/download;Figure;Fig1.tif](#)

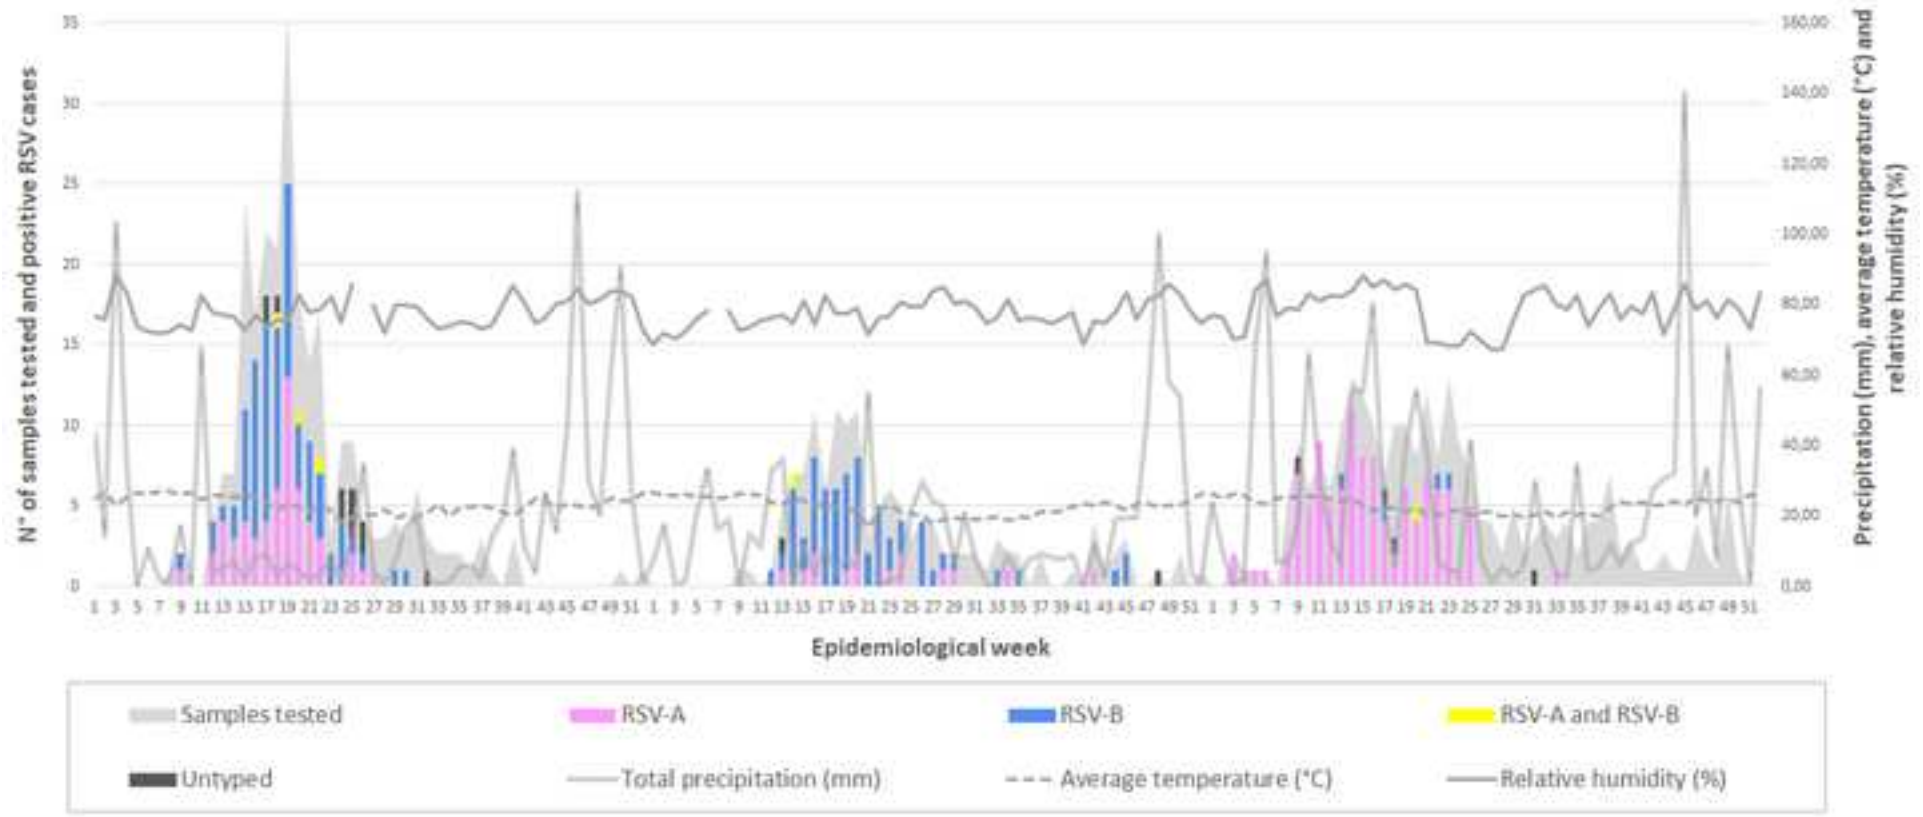



Figure 3

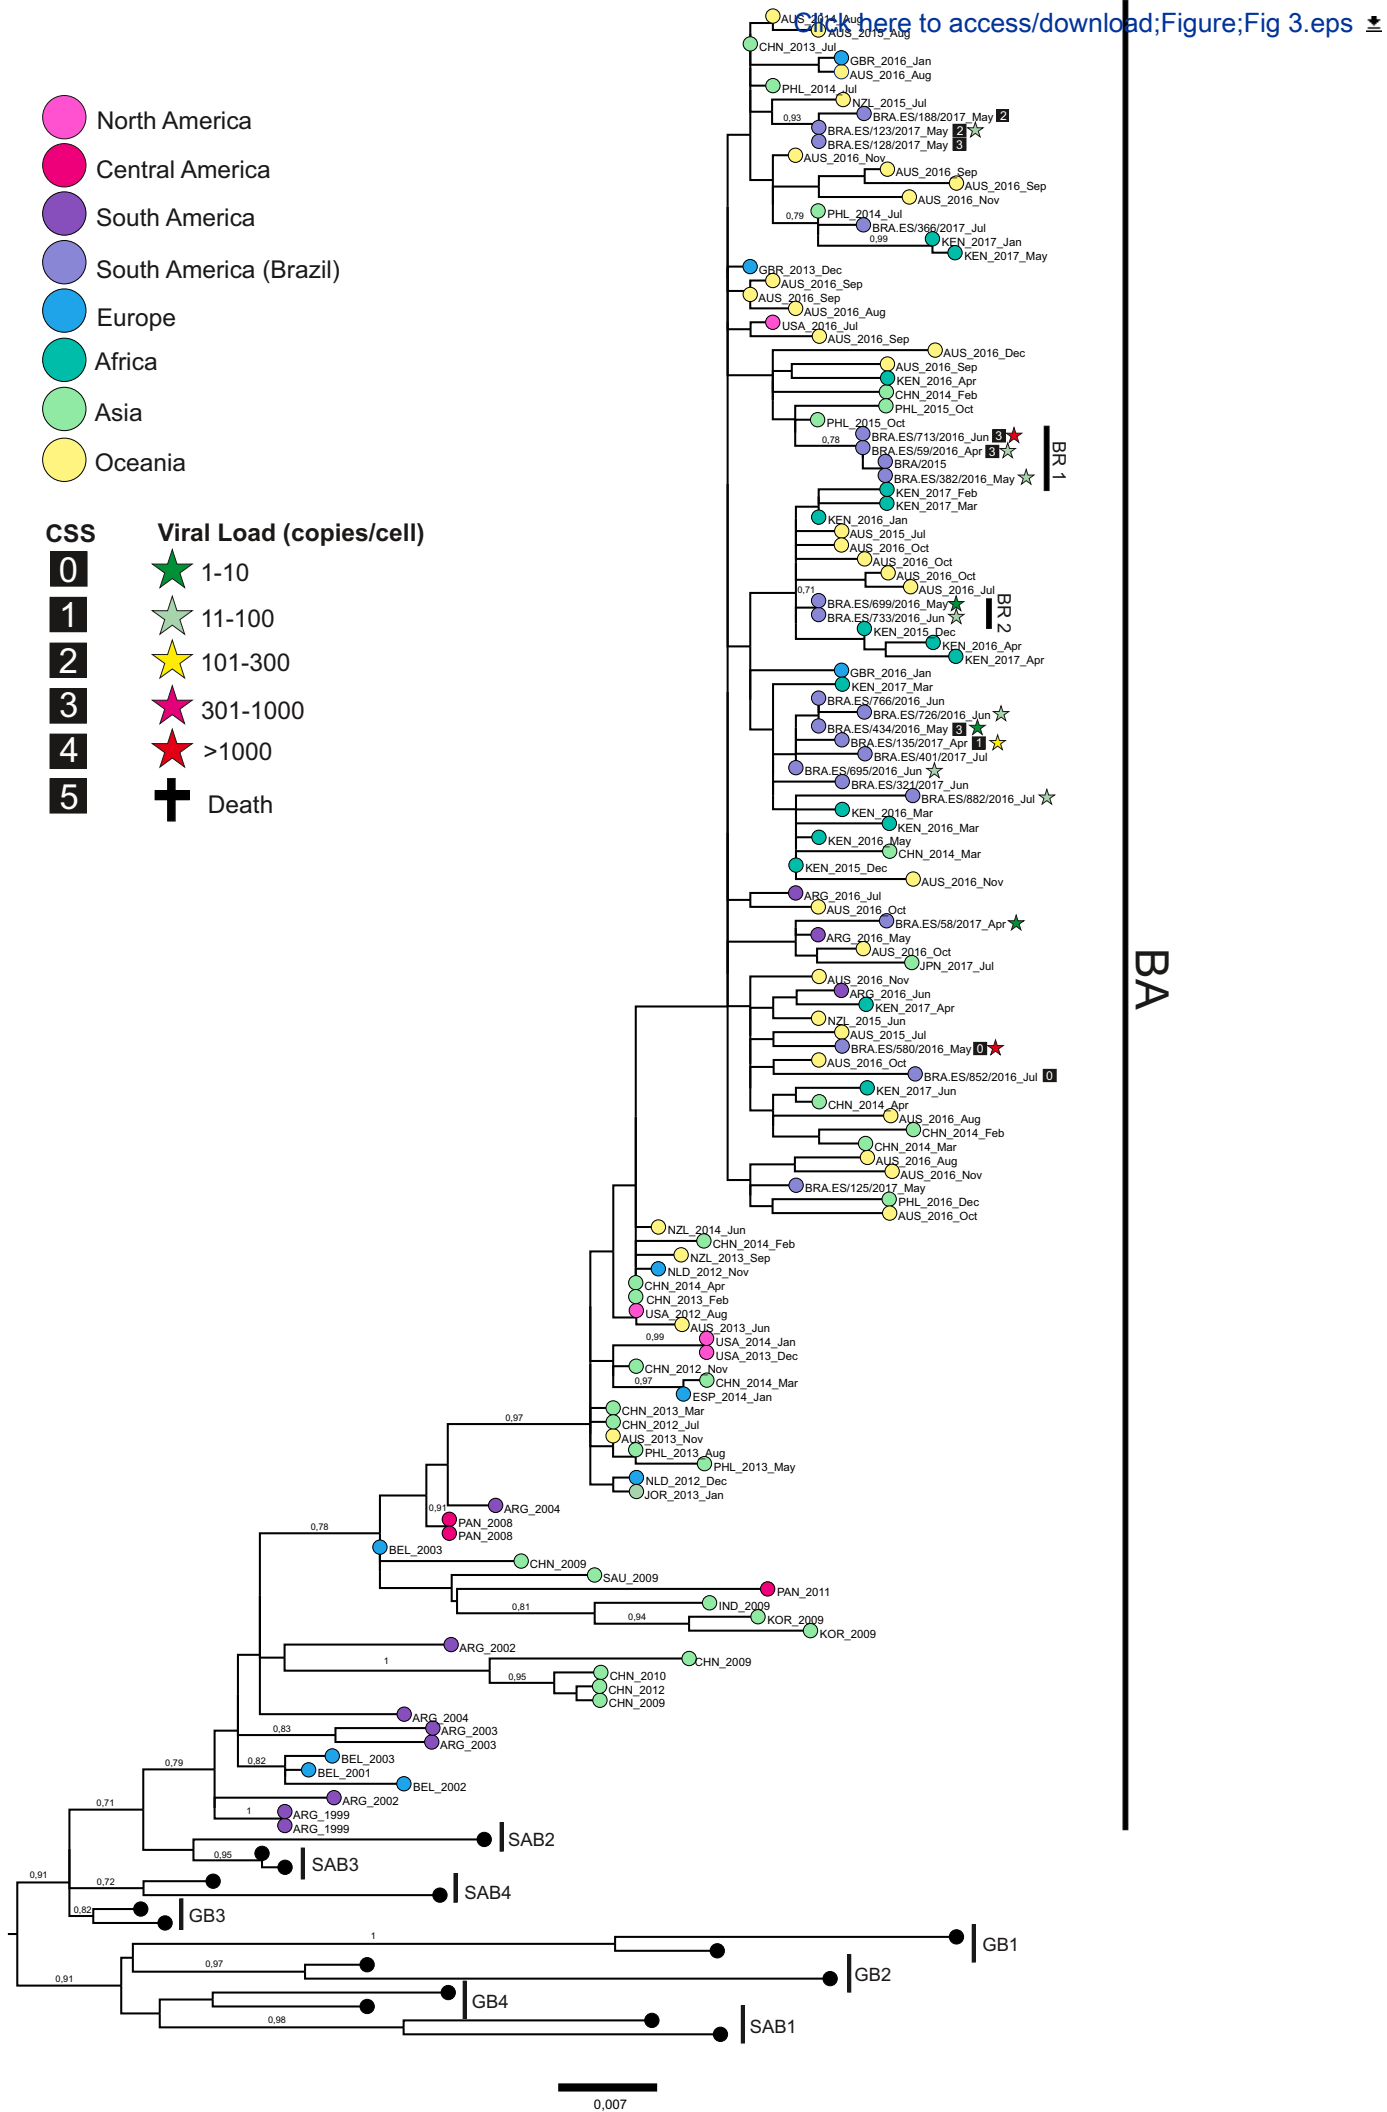

0.007

Click here to access/download;Figure;Fig 3.eps

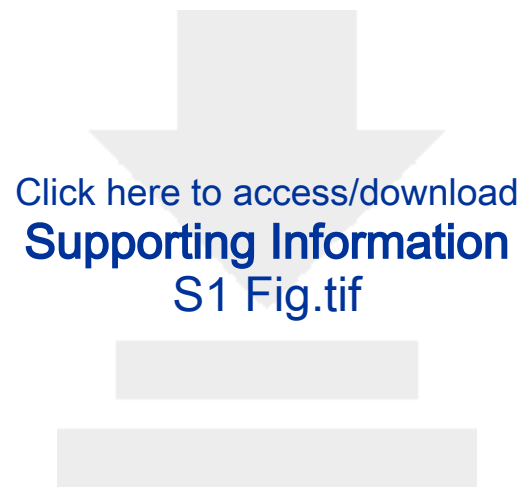

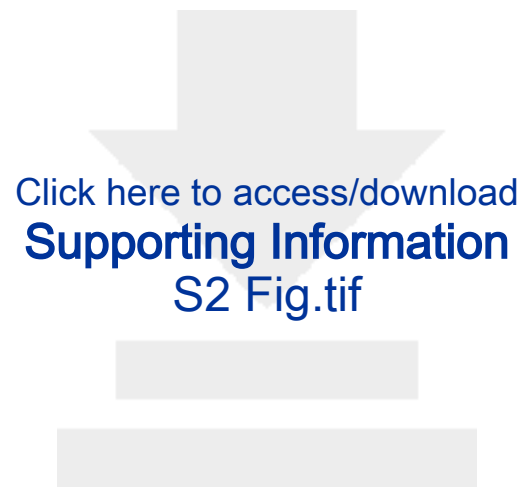



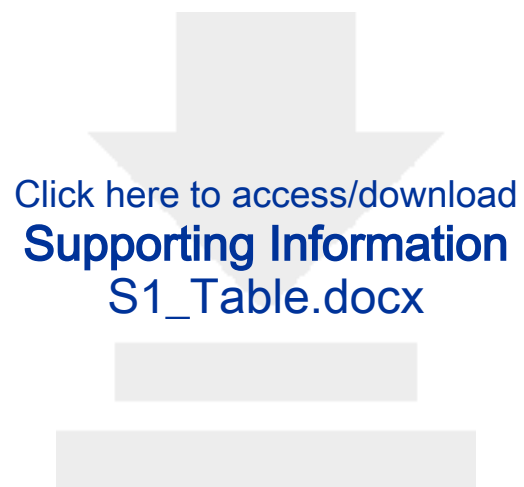

Click here to access/download  
**Supporting Information**  
S1\_Table.docx

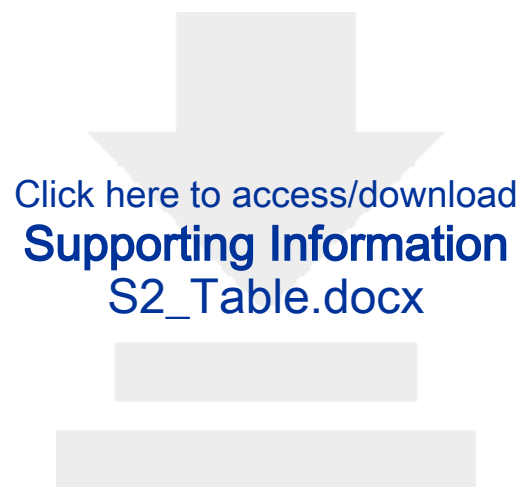

Click here to access/download  
**Supporting Information**  
S2\_Table.docx

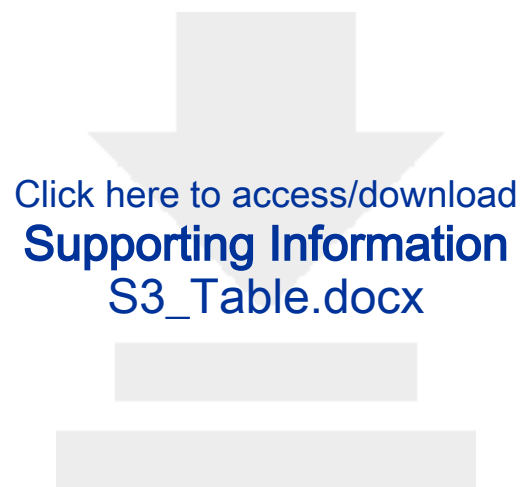

Click here to access/download  
**Supporting Information**  
S3\_Table.docx

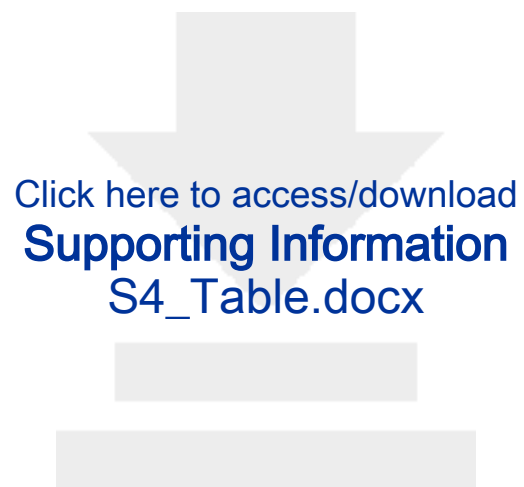

Click here to access/download  
**Supporting Information**  
S4\_Table.docx

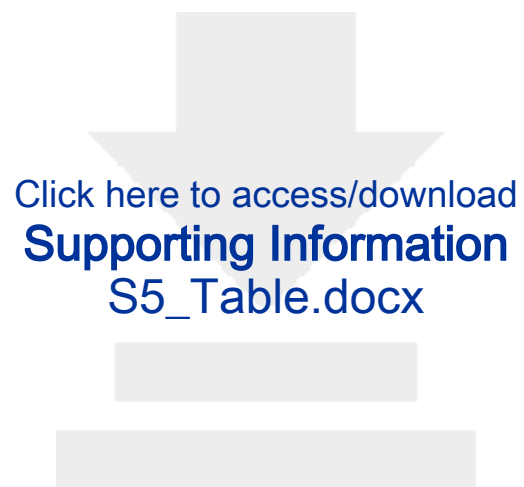

Click here to access/download  
**Supporting Information**  
S5\_Table.docx

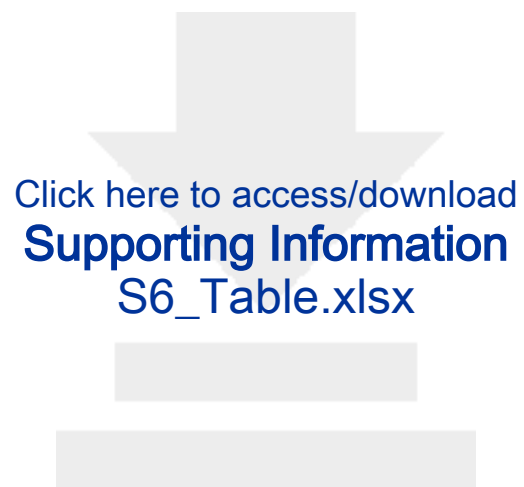

Click here to access/download  
**Supporting Information**  
S6\_Table.xlsx

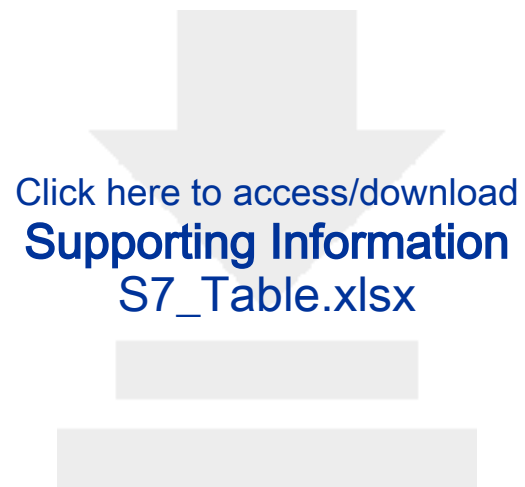

Click here to access/download  
**Supporting Information**  
S7\_Table.xlsx

1 **Full Title:** ~~Seasonality, molecular epidemiology and virulence~~**Landscape of**  
2 **Respiratory Syncytial Virus (RSV): a perspective into the Brazilian Influenza**  
3 **Surveillance Program**

**Formatted:** Font: (Default) Times New Roman, Font color: Auto

4 **Short Title:** **Landscape of Respiratory Syncytial Virus (RSV)**

5 Lucas A. Vianna<sup>1,2</sup>, Marilda M. Siqueira<sup>3</sup>, Lays P. B. Volpini<sup>4</sup>, Iuri D. Louro<sup>2</sup>, Paola C.  
6 Resende<sup>3</sup>

7 <sup>1</sup> ~~Central Laboratory of Public Health of the State of Espirito Santo, Vitoria, Espirito~~  
8 ~~Santo, Brazil.~~

**Formatted:** Not Superscript/ Subscript

9 <sup>2</sup> ~~Nucleus of Human and Molecular Genetics/ Federal University of Espirito Santo/~~  
10 ~~UFES, Vitoria, Espirito Santo, Brazil.~~

**Formatted:** Not Superscript/ Subscript

11 <sup>3</sup> ~~Laboratory of Respiratory Viruses and Measles, National Influenza Center (NIC)/~~  
12 ~~World Health Organization (WHO), Oswaldo Cruz Institute, Oswaldo Cruz Foundation,~~  
13 ~~Rio de Janeiro, Rio de Janeiro, Brazil.~~

**Formatted:** Not Superscript/ Subscript

14 <sup>4</sup> ~~Virology & Infectious Gastroenteritis Laboratory / Federal University of Espirito Santo~~  
15 ~~/UFES, Vitoria, Espirito Santo, Brazil.~~

## 16 **Abstract**

**Formatted:** Font: 18 pt

17 **Background:** Respiratory Syncytial Virus (RSV) is the main cause of pediatric morbidity  
18 ~~and mortality in children.~~ ~~The complex evolution of RSV creates a need for worldwide~~  
19 ~~surveillance, which may assist in the understanding of multiple viral~~  
20 ~~aspects.~~ ~~Understanding RSV's seasonality, clinical features, contribution of viral load and~~  
21 ~~genetic diversity in Brazil may contribute to improve the global surveillance and the~~  
22 ~~development of vaccines and antiviral drugs.~~

23 **Objectives:** This study aimed to investigate RSV features under the ~~perspective of the~~  
24 ~~Brazilian Influenza Surveillance Program, evaluating the role of viral load and genetic~~



25 diversity in ~~the~~ disease severity and the influence of climatic factors in ~~the~~ viral  
26 seasonality.

27 **Methodology:** ~~From 2016 to 2018, w~~We ~~have~~ investigated the prevalence of RSV in  
28 children up to 3 years old with severe acute respiratory infection (SARI) in ~~the~~ Espirito  
29 Santo State (ES), Brazil, ~~from 2016 to 2018. Testing by~~ RT-qPCR allowed for ~~the~~ viral  
30 detection and ~~measure of~~ viral load ~~quantification, in order~~ to evaluate association with  
31 clinical features, ~~and as well as~~ mapping of local viral seasonality. Gene G sequencing and  
32 phylogenetic reconstruction ~~showed the~~ ~~demonstrated~~ local genetic diversity.

33 **Results:** Of 632 evaluated cases, 56% were caused by RSV, with both subtypes A and B  
34 co-circulating throughout the years. A discrete inverse association between average  
35 temperature and viral circulation was observed. No correlation between viral load and  
36 severity was observed, but children infected with RSV-A presented higher clinical  
37 severity score (CSS) median, stayed longer in the hospital, required more ~~often~~ intensive  
38 care and ventilatory support than those infected by RSV-B. Regarding ~~the~~ RSV diversity,  
39 some local genetic groups were observed in the main genotypes circulation RSV-A ON1  
40 and RSV-B BA, ~~with strains showing modifications in the G gene amino acid chain,~~  
41 ~~associated new reported amino acid changes.~~

42 **Conclusion:** Local RSV studies ~~using of~~ the ~~Brazilian~~ Influenza Surveillance Program  
43 are relevant because they can reveal useful information, contributing to the global RSV  
44 surveillance. Understanding seasonality, virulence ~~and,~~ genetic diversity ~~can~~  
45 ~~guarantee~~ support the suitability of future antiviral drugs and vaccines ~~to circulating~~  
46 ~~strains and assist in the most opportune time of the administration of prophylactic~~  
47 ~~strategies, can support antiviral and vaccine development.~~

## 48 Introduction

Formatted: Not Highlight

Formatted: English (United States)

Formatted: Highlight

Formatted: Font: 18 pt

49 Respiratory Syncytial Virus (RSV) is the most common pathogen associated with  
50 acute respiratory tract infections (ARTI), being the main cause of bronchiolitis and  
51 pneumonia in infants and small children [1]. ~~In 2015, RSV was responsible for~~  
52 ~~approximately 33.1 million cases of acute lower respiratory infections (ALRI) in children~~  
53 ~~under 5 years old and more than 59.000 deaths worldwide [2]. In Brazil, according to the~~  
54 ~~Influenza and other respiratory viruses epidemiological reports, RSV has shown an~~  
55 ~~important role on severe acute respiratory infections (SARI), ranging from 9.75 to 17.3%~~  
56 ~~between 2016 and 2019 [3]. In 2019, 5% of the deaths due to SARI were caused by RSV~~  
57 ~~[3].~~

58 RSV infection can cause a ~~diverse~~ range of symptoms, varying from a mild upper  
59 respiratory tract illness to a severe lower respiratory tract infection [2]. The reason for  
60 different outcomes is still unclear, however it can be related to the underline conditions,  
61 genetic or acquired host factors, and/or viral characteristics [3,4]. Some studies have  
62 evaluated the association between viral load and disease severity, with significant  
63 associations [4,5]. However, ~~most of these studies did not use standardized methods of~~  
64 ~~measuring viral load measurement, therefore,~~ this relationship must be more carefully  
65 evaluated. The understanding of RSV infection viral load may be a tool to establish its  
66 relationship with disease progression, severity, clinical outcome ~~under the moment to~~  
67 drug intervention ~~timeframe~~ [6].

68 ~~The RSV~~ treatment is based only in supportive care and infection prevention is  
69 limited to passive immunoprophylaxis (Palivizumab) and case isolation [2]. No licensed  
70 RSV vaccine is available, but some promising candidates are currently in development  
71 and in advanced clinical trial phases [7].

72 ~~Based on the reactivity of monoclonal antibodies,~~ RSV strains can be classified  
73 into two serogroups: RSV-A and RSV-B [8]. The potential virulence attributed to a

74 specific group remains controversial: some authors have pointed RSV-A [9,10] or RSV-  
75 B [11] as the most virulent subtype, other studies ~~have not found~~~~did not find~~ significant  
76 differences between them [12].

77 ~~As a typical RNA virus, RSV evolution is complex and dynamic, presenting~~  
78 ~~remarkable changes over the time, with the emergence of new genotypes and extinction~~  
79 ~~of others [13].~~ Multiple genotypes were described for RSV-A and RSV-B, based on ~~the~~  
80 ~~gene G~~ second hypervariable region (HVR-2) ~~of gene G~~ [13,14]. In the past two decades  
81 important shifts occurred with the emergence of new RSV-A and RSV-B genotypes:  
82 ~~RSV-A~~ ON1 containing a duplication of 72 nucleotides, and ~~RSV-B~~ BA with a  
83 duplication of 60 nucleotides in the HVR-2 gene G [14,15]. These genotypes replaced ~~the~~  
84 previous ones and have spread globally. Understanding their genetic diversity may reveal  
85 the virus's ability to cause re-infections throughout life, and help designing antiviral  
86 drugs, diagnostic assays and vaccines [13].

87 In 2017, the World Health Organization (WHO) launched the Global Respiratory  
88 Syncytial Virus Surveillance Pilot in order to test the feasibility of using the Global  
89 Influenza Surveillance and Response System (GISRS) for RSV surveillance without  
90 adversely affecting influenza surveillance [16]. This pilot study results from the global  
91 concern about RSV impact on public health. Brazil, ~~one of the four countries in the~~  
92 ~~Americas to be included in the pilot,~~ has a remarkable respiratory virus surveillance  
93 program, however, more data are required for a better understanding of factors such as  
94 RSV circulation, evolution, and pathogenicity. ~~In the light of this perspective, w~~ In this  
95 study, we used the Brazilian Influenza Surveillance Program to analyze the local  
96 prevalence of RSV in children with SARI and to evaluate which factors are potentially  
97 associated with disease severity. We also explored the viral seasonality and investigate  
98 the influence of climatic factors in the circulation. Finally, we conducted a phylogenetic

Formatted: English (United States)

Formatted: English (United States)

Formatted: English (United States)

99 study to understand how the local genetic diversity of RSV behaves with that observed in  
100 the rest of the world.We have performed an RSV molecular and epidemiological study  
101 from 2016 to 2018 in the Espirito Santo State (ES), southeastern Brazil. Sampling was  
102 obtained from the National INFLUENZA SURVEILLANCE PROGRAM of children  
103 diagnosed with SARI. Here we highlight the high prevalence of RSV in children with  
104 SARI and its possible association with severe disease. Additionally, we have shown the  
105 seasonality oscillation in the ES state, creating difficulties for the determination of the  
106 most appropriate period to start prophylaxis and control actions to mitigate viral  
107 circulation.

Formatted: Highlight

## 108 **Materials and methods**

Formatted: Font: 18 pt

109 **Ethics Statement.** This project was approved by the Human Research Ethics Committee  
110 of the Health Sciences Center of the Federal University of Espirito Santo (UFES), under  
111 the number: 018577/2018; CAAE: 84633518.1.0000.5060.

### 112 **Population sampling, study period and location Sampling.**

Formatted: Font: 16 pt

113 This study is a retrospective investigation of ~~fn~~ respiratory samples (nasopharyngeal  
114 secretions, tracheal and bronchoalveolar aspirate and bronchoalveolar lavage) collected  
115 from the Brazilian Influenza Surveillance Program during 34 months (March 7th, 2016,  
116 to December 14th, 2018). A total of Up to 632 samples collected from pediatric patients  
117 (from 0 to 36 months old) classified as SARI, residents of 60 municipalities in the ES  
118 State, were enrolled in this study. ES state is located in southeastern Brazil and it has a  
119 territory of 46.074,447 km<sup>2</sup>, with a population of approximately 4.1 million inhabitants  
120 [17]. These samples were screened by real-time RT-qPCR for RSV and Influenza A/B at  
121 the ES Central Public Health Laboratory ~~of Public Health of Espirito Santo~~ (LACEN/ES),

one of 26 Brazilian laboratories that integrate the ~~National~~ Brazilian Ministry of Health  
Influenza Surveillance Program ~~of the Brazilian Ministry of Health~~.

## **RSV and Influenza detection and subtyping**

Formatted: Font: 16 pt

~~The~~ Nucleic acids were extracted from ~~the~~ respiratory samples using the PureLink™  
Viral RNA/DNA Mini Kit (Invitrogen®, Thermo Fisher Scientific®), according to ~~the~~  
manufacturer's protocol. All samples were tested initially ~~for~~ Influenza A and B in a  
TaqMan® one-step real time RT-PCR (RT-qPCR) assay with primers and probes specific  
for influenza (CDC, USA), according to manufacturer's recommendations. Additionally,  
RT-qPCR assay was performed to identify positive RSV cases ~~of RSV~~ using GoTaq®  
Probe 1-Step RT-qPCR Kit (Promega, Madison, WI, EUA). RSV positive samples (*i.e.*  
those with cycle threshold [CT] < 40) were subtyped using specific primers and probes  
to RSV-A and RSV-B N gene ~~of RSV-A and RSV-B~~. In parallel, Ribonuclease P RNA  
(RNase P) was also tested as an internal control for each sample and all batches tested  
had an RNA extraction negative control (MOCK) and a PCR negative control (NTC). All  
primers and probes are described ~~description are listed~~ in the S1 Table.

## **Clinical and epidemiological data collection**

Formatted: Font: 16 pt

Clinical and epidemiological data were retrieved mainly from the Information System of ~~fn~~  
Diseases of Compulsory Declaration of Notification Illness (SINAN) and, in some cases  
– where the SINAN file was incomplete – we assessed ~~the patients'~~ Medical Records  
~~from the patients~~ to fill missing information. The main information recovered from  
SINAN were: 1) clinical outcome (recovered or death); 2) length of hospitalization length  
stay; 3) necessity and type of oxygen administration need and type (invasive or not  
invasive), 4) necessity and length of intensive care unit (ICU) need and length; 5) clinical

147 characteristics (fever, cough, dyspnea, O<sub>2</sub> saturation, respiratory distress, comorbidities)  
148 and 6) epidemiological and demographical features (age, race, town or area of residence).  
149 ~~Here w~~We have used the Brazilian Ministry of Health definition of SARI, that is:  
150 hospitalized patient with fever and cough or sore throat and presenting dyspnea or O<sub>2</sub>  
151 saturation <95%, or respiratory distress [18]. A Clinical Severity Score (CSS) was  
152 adapted from Martinello *et al.* [19]. The scale ranged from 0 to 5 points, where 0 was  
153 the mildest condition and 5 ~~is~~ the most severe ~~ease~~. ICU admission, hospitalization length  
154 ≥5 days, oxygen saturation ≤95% and oxygen therapy noninvasive methods ~~of oxygen~~  
155 ~~therapy~~ accounted for 1 point each. Two points ~~were~~ assigned for if patient required  
156 mechanical ventilation.

157

### 158 **Viral load measurement**quantification

Formatted: Font: 16 pt

159 RSV viral load was determined by RT-qPCR using a protocol adapted from Álvarez-  
160 Argüelles *et al.* [21], including a synthetic  $\beta$ -globin dsDNA as a template. To quantify  
161 the RSV copy number, expressed in copies per cell (c/c), we designed a dsDNA  
162 containing the annealing regions of RSV primers and probe, as well as the upstream and  
163 downstream regions (~~up to a total of 150 bp~~). This synthetic DNA was incorporated into  
164 a pMA-T plasmid, which was used in the RT-qPCR. Standard curves for absolute  
165 quantification of RSV and  $\beta$ -globin gene were generated by 10-fold serial dilutions ( $10^6$ -  
166  $10^1$  copies of genome), in triplicate. RSV primers, probe and the thermal cycling protocol  
167 used were the same used in the diagnostic phase.  $\beta$ -globin primers and probe are listed in  
168 **S1** ~~supplementary~~ **Table 1**. All amplification assays were carried out in the ABI 7500  
169 equipment (Applied Biosystems, Foster City, CA, USA). Viral load status was compared  
170 with different clinical features and epidemiological data.

171

## Climate data collection

Formatted: Font: 16 pt

Climate data (precipitation, temperature and humidity) of five cities – representatives from the different geographic regions of the state – were daily collected and kindly provided by the Capixaba Institute of Research, Technical Assistance and Rural Extension (INCAPER), Vitoria, Espirito Santo, Brazil. The weekly average was accessed by assembling ~~the~~ daily data from all collection sites for each epidemiological week (EW). The definition of RSV epidemic period was based on a previously described protocol [20], which considers RSV outbreak onset, peak and end. Seasonality onset ~~and end~~ ~~were~~ was defined as the first ~~and last~~ of 2 consecutive weeks, ~~respectively~~, when >10% or higher of the total tested samples for respiratory pathogens were positive for RSV ~~the number of RSV cases exceeded 10% of the number detected during the RSV peak week~~. Similarly, the end of the RSV seasonality end was defined when the proportion of positive RSV tests fell below 10% for two consecutive weeks. ~~The p~~Peak was determined as the week when the maximum number of RSV positive cases occurred [20].

Formatted: English (United States)

~~**RSV detection and subtyping.** The nucleic acids were extracted from the respiratory samples using the PureLink™ Viral RNA/DNA Mini Kit (Invitrogen®, Thermo Fisher Scientific®), according to the manufacturer's protocol. All samples were tested initially by Influenza A and B in a TaqMan® one step real time RT-PCR (RT-qPCR) assay with primers and probes specific for influenza (CDC, USA), according to manufacturer's recommendations. Additionally, RT-qPCR assay was performed to identify positive cases of RSV using GoTaq® Probe 1-Step RT-qPCR Kit (Promega, Madison, WI, EUA). RSV positive samples (*i.e.* those with cycle threshold [CT] ≤ 40) were subtyped using specific primers and probes to RSV A and RSV B. In parallel, Ribonuclease P RNA (RNase P) was also tested as an internal control for each sample and all batches tested had an RNA~~

197 ~~extraction negative control (MOCK) and a PCR negative control (NTC). All primers and~~  
198 ~~probes description are listed in the **Supplementary Table 1**.~~

199 ~~**Viral load measurement.** RSV viral load was determined by RT-qPCR using a protocol~~  
200 ~~adapted from Álvarez Argüelles *et al.* [21], including a synthetic  $\beta$ -globin dsDNA as a~~  
201 ~~template. To quantify the RSV copy number, expressed in copies per cell (c/c), we~~  
202 ~~designed a dsDNA containing the annealing regions of RSV primers and probe, as well~~  
203 ~~as the upstream and downstream regions, up to a total of 150 bp. This synthetic DNA was~~  
204 ~~incorporated into a pMA-T plasmid, which was used in the RT-qPCR. Standard curves~~  
205 ~~for absolute quantification of RSV and  $\beta$ -globin gene were generated by 10 fold serial~~  
206 ~~dilutions ( $10^6$ - $10^4$  copies of genome), in triplicate. RSV primers, probe and the thermal~~  
207 ~~cycling protocol used were the same used in the diagnostic phase.  $\beta$ -globin primers and~~  
208 ~~probe are listed in **Supplementary Table 1**. All amplification assays were carried out in~~  
209 ~~the ABI 7500 equipment (Applied Biosystems, Foster City, CA, USA). Viral load status~~  
210 ~~was compared with different clinical features and epidemiological data.~~

## 212 **Partial amplification and sequencing of glycoprotein gene**

213 ~~RSV-A and RSV-B positive samples were selected to be sequenced based on the~~  
214 ~~following criteria: a) cycle threshold (ct) value less than 30, due to the difficulty in~~  
215 ~~sequencing samples with ct higher than this; b) representativeness by collection date; c)~~  
216 ~~distinct clinical outcomes; and d) different viral load values.~~

217 The partial gene G amplification (about 730 bp) was performed at  
218 LVRS/IOC/FIOCRUZ, the National Influenza Center, by conventional RT-PCR, using  
219 the QIAGEN OneStep RT-PCR Kit (Qiagen) and a pair of primers (**S~~u~~pplementary**  
220 **Table 1**) for each subtype. The reverse transcription was performed at 55°C for 30  
221 minutes and the cDNA was amplified by PCR (40 cycles of 94°C/30 seconds, 60°C /1

Formatted: Font: 16 pt



222 minute, 72°C/1 minute and a final extension at 72°C/10 minutes). Amplification was  
223 confirmed in a 1% agarose gel. DNA was purified using ExoSap-IT Kit (Affymetrix, Inc.,  
224 USA) and submitted to sequence reaction using BigDye™ Terminator v3.1 Cycle  
225 Sequencing Kit (Applied Biosystems, Foster City, CA, USA) and primers at 3.2 μmolar.  
226 The reads were obtained in the ABI 3130XL Genetic Analyzer (Applied Biosystems).  
227 Consensus sequences were built from electropherograms comparison with a reference  
228 sequence in the software Sequencher 5.1 [22]. The adopted nomenclature pattern here:  
229 was “hRSV subtype/country/ES-sample number/year.”

230

## 231 **RSV genotyping and gene G phylogenetic reconstruction**

Formatted: Font: 16 pt

232 ~~h~~RSV-A and RSV-B gene G DNA sequences (~~of~~ 711 bp and 726 bp, respectively) were  
233 used to reconstruct phylogenetic relationships. Genotyping was based on gene G HVR-  
234 2, using RSV-A and RSV-B sequences (~~of~~ 336 bp and 318 bp ~~in length~~, respectively).  
235 Reference sequences of previously described genotypes are shown in ~~S2~~**Supplementary**  
236 **Table 2**. Additionally, to place our sequences in a global context we performed a BLAST  
237 search (Basic Local Alignment Search Tool), available at  
238 <https://blast.ncbi.nlm.nih.gov/Blast.cgi>. These sequences (~~S3~~**Supplementary Table 3**)  
239 were labeled with country of origin and collection year, and those with more than 99.5%  
240 genetic similarity using CD-HIT tool (<http://weizhongli-lab.org/cd-hit/servers.php>) were  
241 removed from the final dataset. Alignments were conducted using Muscle algorithm, via  
242 MEGA 6.0 software [23] and when necessary they were adjusted manually. The  
243 phylogenetic trees were constructed using the Maximum Likelihood (ML) method,  
244 complete deletion for gap or missing data treatment and 1000 replicates of bootstrap  
245 probabilities tools integrated within Mega 6.0. General Time Reversible + Gamma  
246 (GTR+G) was the nucleotide substitution model elected for all analysis on JModelTest

Field Code Changed

Field Code Changed

247 software, with an exception for RSV-A, which Tamura-Nei + Gamma (TrN+G) was the  
248 substitution model nucleotide indicated for the analysis [24]. Average pairwise distance  
249 (p-distance) was calculated in Mega 6.0. Amino acid comparisons with the reference  
250 sequences of ON1 (JN257693) and BA (AY333364) were performed using MEGA 6.0  
251 software to map the changes in ~~amino acids in~~ Brazilian samples [amino acids](#).

252

### 253 **Statistical treatment**

Formatted: Font: 16 pt

254 -Statistical analyses were performed using SPSS 20.0 (SPSS, Inc., Chicago, IL) and R  
255 v.3.4.4 software. Chi-square, Fisher exact, Mann-Whitney and Kruskal Wallis were used  
256 whenever appropriated. To test the association between climate data and RSV circulation  
257 we performed the Spearman correlation test. A p-value of less than 0.05 was considered  
258 statistically significant.

259

### 260 **Data availability**

Formatted: Font: 16 pt

261 -The sequences produced here were deposited on GenBank platform, under the accession  
262 number MW026969- MW027004 and MW030961-MW030981, and in GISAID  
263 platform, under the accession number EPI\_ISL\_549271- EPI\_ISL\_549327.

264

### 265 **Ethics Statement**

Formatted: Font: 16 pt

266 This project was approved by the Human Research Ethics Committee of the Health  
267 Sciences Center of the Federal University of Espirito Santo (UFES), under the number:  
268 018577/2018; CAAE: 84633518.1.0000.5060. The need for parents or guardians consent  
269 was waived by the ethics committee.

270

## Results

### RSV clinical and epidemiological data

A total of 632 respiratory samples collected from children under 3 years-old were tested by RT-qPCR for Influenza A, Influenza B and RSV, being RSV the most prevalent pathogen found in these samples (56%; 352/632) (Table 1). From RSV positive cases, 54% (180/352) were RSV-A, 147 (44%) were RSV-B, co-detections with both subtypes were found in 5 cases (1.5%). Twenty samples could not be subtyped. The frequency prevalence of Influenza was only 7.4% (47/632), being and of these 10.6% (5/47) were Influenza B, 74.4% (35/47) were Influenza A H1N1 pdm09 and 14.9% (7/47) were H3N2, 14.9% (7/47) H3N2 and 10.6% (5/47) Influenza B. Male gender was slightly more affected by RSV (n=182; 52%) and median age was 4 months old (1-11.0 interquartile range; IQR). Of From positive cases, being 66.2% between 0 and 7 months old 99.7% (351/352) of positive cases were classified as SARI and 14 deaths (4%) were reported. Most children of this study were brown (54%), according to the self-racial classification carried out by declaration of children's legal guardian responsible.

Racial classification was carried out by declaration of those responsible for the children, being 54% declared brown, 41% white, and black /yellow represented 4%.

**Table 1.** Number of tested samples, RSV positivity, subtype prevalence and demographic data from each year and from the whole study period of the study. Statistical tests were performed to verify the statistical significance of the data differences among between the years. Statistically significant values are highlighted in **redbold**.

|                     | 2016<br>n (%)     | 2017<br>n (%)     | 2018<br>n (%)     | p-value      | 2016-18<br>n (%)  |
|---------------------|-------------------|-------------------|-------------------|--------------|-------------------|
| <b>General data</b> |                   |                   |                   |              |                   |
| Sample n°           | 251/632<br>(0.40) | 135/632<br>(0.21) | 246/632<br>(0.39) | -            | 632/632<br>(1)    |
| RSV +               | 155/251<br>(0.62) | 80/135<br>(0.59)  | 117/246<br>(0.48) | <b>0.003</b> | 352/632<br>(0.56) |
| RSV -               | 96/251<br>(0.38)  | 55/135<br>(0.41)  | 129/246<br>(0.52) |              | 280/632<br>(0.44) |

Formatted: Font: 18 pt

Formatted: Font: 16 pt

Formatted: Indent: First line: 0"

Formatted: Font color: Red

Formatted: Font color: Red

Formatted: Font color: Auto

Formatted: Font: 12 pt

Formatted: Font: 11 pt

Formatted: Indent: First line: 0"

Formatted: English (United States)

Formatted: Font: Bold, Font color: Auto

Formatted: Font: Bold

|                                |                          |                         |                          |                     |                          |
|--------------------------------|--------------------------|-------------------------|--------------------------|---------------------|--------------------------|
| Flu +                          | <u>27/632</u><br>(0.11)  | <u>6/135</u><br>(0.04)  | <u>14/246</u><br>(0.06)  | =                   | <u>47/632</u><br>(0.07)  |
| RSV+ deaths                    | <u>6/251</u><br>(0.04)   | <u>5/135</u><br>(0.06)  | <u>3/246</u><br>(0.03)   | 0.42 <sup>1</sup>   | <u>14/352</u><br>(0.04)  |
| Subtyped samples               | <u>141/251</u><br>(0.91) | <u>78/135</u><br>(0.98) | <u>113/246</u><br>(0.97) | -                   | <u>332/352</u><br>(0.94) |
| <b>Subtypes</b>                |                          |                         |                          |                     |                          |
| RSV-A                          | <u>58/141</u><br>(0.41)  | <u>14/78</u><br>(0.18)  | <u>108/113</u><br>(0.96) |                     | <u>180/332</u><br>(0.54) |
| RSV-B                          | <u>80/141</u><br>(0.57)  | <u>63/78</u><br>(0.81)  | <u>4/113</u><br>(0.04)   | <0.001 <sup>1</sup> | <u>147/332</u><br>(0.44) |
| RSV-A and RSV-B                | <u>3/141</u><br>(0.02)   | <u>1/78</u><br>(0.01)   | <u>1/113</u><br>(0.01)   |                     | <u>5/332</u><br>(0.02)   |
| <b>Demographic data (RSV+)</b> |                          |                         |                          |                     |                          |
| Median age (months)            | 4 (1-12.0)               | 4 (1-10.5)              | 3 (1-8.0)                | 0.793               | 4 (1-11.0)               |
| <b>Gender</b>                  |                          |                         |                          |                     |                          |
| Male                           | <u>72/155</u><br>(0.46)  | <u>49/80</u><br>(0.61)  | <u>61/117</u><br>(0.52)  | 0.098               | <u>182/352</u><br>(0.52) |
| Female                         | <u>83/155</u><br>(0.54)  | <u>31/80</u><br>(0.39)  | <u>56/117</u><br>(0.48)  |                     | <u>170/352</u><br>(0.48) |
| <b>Race</b>                    |                          |                         |                          |                     |                          |
| White                          | <u>61/122</u><br>(0.50)  | <u>26/66</u><br>(0.39)  | <u>31/97</u><br>(0.32)   |                     | <u>118/285</u><br>(0.41) |
| Brown                          | <u>53/122</u><br>(0.43)  | <u>38/66</u><br>(0.58)  | <u>64/97</u><br>(0.66)   |                     | <u>155/285</u><br>(0.54) |
| Black                          | <u>7/122</u><br>(0.06)   | <u>1/66</u><br>(0.02)   | <u>2/97</u><br>(0.02)    | 0.039 <sup>1</sup>  | <u>10/285</u><br>(0.04)  |
| Yellow                         | <u>1/122</u><br>(0.01)   | <u>1/66</u><br>(0.02)   | 0                        |                     | <u>2/285</u><br>(0.01)   |
| Undeclared                     | 33                       | 14                      | 19                       |                     | 66                       |

<sup>1</sup> Fisher's exact test.

Formatted: Font: Bold, Font color: Auto

Formatted: Font: Bold

Formatted: Font: Bold, Font color: Auto

Formatted: Font: Bold

Formatted: Font: Not Bold

293  
294  
295 Table 2 shows patients' clinical features by RSV+ and subtypes. The Table 2  
296 shows the RSV affected patients' clinical features of patients affected by RSV and the  
297 comparison between subtypes. Regarding the clinical features of patients affected by RSV  
298 (Table 2), cough was the most frequent symptom reported was cough (93%, 318/341),  
299 followed by respiratory distress (88%, 269/307), and fever (86%, 288/336), dyspnea  
300 (76%, 251/331) and oxygen saturation  $\leq$  95% (61%, 169/277). Absence of fever was  
301 reported in 14.3% (48/336) of cases; 74% (252/342) of children needed oxygen therapy  
302 and 38% (95/252) of these required mechanical ventilation. The median hospitalization

303 time was 8 (6-14 IQR) days. Intensive care was needed for 61% (202/333) of patients and  
 304 the median number of days in ICU was 6 (3-10 IQR).

305

306 **Table 2. Summary of clinical and epidemiological data by RSV+ and each subtype.** Summary of clinical  
 307 and epidemiological data by subtype: RSV-A and RSV-B. Statistically significant values are highlighted in  
 308 **redbold**.

|                                       | <b>RSV+</b>                                           |                                | <b>Subtypes</b>                |              | <b>p-value</b>    |
|---------------------------------------|-------------------------------------------------------|--------------------------------|--------------------------------|--------------|-------------------|
|                                       | <b>2016-2018</b>                                      |                                | <b>RSV-A</b>                   | <b>RSV-B</b> |                   |
|                                       | <b>n (%)</b>                                          |                                |                                |              |                   |
| <b>Demographic profile</b>            |                                                       |                                |                                |              |                   |
| Sample number                         | <del>632</del> <b>352</b> (4)                         | 180                            | 147                            |              |                   |
| Deaths RSV+                           | 14/ <del>352</del> <b>352</b>                         | 3/ <del>180</del> <b>180</b>   | 8/ <del>147</del> <b>147</b>   |              | 0.07 <sup>1</sup> |
|                                       | (0.04)                                                | (0.02) <del>17</del> <b>17</b> | (0.05) <del>4</del> <b>4</b>   |              |                   |
| <b>Age</b>                            |                                                       |                                |                                |              |                   |
| Median age: months (IQR) <sup>2</sup> | 4 (1-11)                                              | 4 (1-10.0)                     | 4 (1-12.5)                     |              | 0.78              |
| <b>Gender</b>                         |                                                       |                                |                                |              |                   |
| Male-♂ (%)                            | 182/ <del>352</del> <b>352</b>                        | 92/ <del>180</del> <b>180</b>  | 78/ <del>147</del> <b>147</b>  |              | 0.725             |
|                                       | (0.52)                                                | (0.51)                         | (0.53)                         |              |                   |
| Female-♀ (%)                          | 170/ <del>352</del> <b>352</b>                        | 88/ <del>180</del> <b>180</b>  | 69/ <del>147</del> <b>147</b>  |              |                   |
|                                       | (0.48)                                                | (0.49)                         | (0.47)                         |              |                   |
| <b>Clinical profile</b>               |                                                       |                                |                                |              |                   |
| Fever                                 | 288/ <del>336</del> <b>336</b>                        | 147/ <del>174</del> <b>174</b> | 124/ <del>139</del> <b>139</b> |              | 0.223             |
|                                       | (0.86)                                                | (0.84)                         | (0.89)                         |              |                   |
| Cough                                 | 318/ <del>341</del> <b>341</b>                        | 162/ <del>176</del> <b>176</b> | 134/ <del>142</del> <b>142</b> |              | 0.418             |
|                                       | (0.93)                                                | (0.92)                         | (0.94)                         |              |                   |
| Dyspnea                               | 251/ <del>331</del> <b>331</b>                        | 135/ <del>172</del> <b>172</b> | 97/ <del>136</del> <b>136</b>  |              | 0.148             |
|                                       | (0.76)                                                | (0.78)                         | (0.71)                         |              |                   |
| O <sub>2</sub> saturation ≤ 95%       | 169/ <del>277</del> <b>277</b>                        | 101/ <del>150</del> <b>150</b> | 56/ <del>109</del> <b>109</b>  |              | <b>0.009</b>      |
|                                       | (0.61)                                                | (0.67)                         | (0.51)                         |              |                   |
| Respiratory distress                  | 269/ <del>307</del> <b>307</b>                        | 154/ <del>167</del> <b>167</b> | 96/ <del>120</del> <b>120</b>  |              | <b>0.002</b>      |
|                                       | (0.88)                                                | (0.92)                         | (0.80)                         |              |                   |
| O <sub>2</sub> Therapy                | 252/ <del>342</del> <b>342</b>                        | 138/ <del>177</del> <b>177</b> | 98/ <del>143</del> <b>143</b>  |              |                   |
|                                       | (0.74)                                                | (0.78)                         | (0.68)                         |              |                   |
| <i>Invasive</i>                       | 95/ <del>252</del> <b>252</b>                         | 56/ <del>138</del> <b>138</b>  | 33/ <del>98</del> <b>98</b>    |              | 0.092             |
|                                       | (0.38)                                                | (0.41)                         | (0.34)                         |              |                   |
| <i>Noninvasive</i>                    | <del>157</del> <b>157</b> / <del>252</del> <b>252</b> | 82/ <del>138</del> <b>138</b>  | 65/ <del>98</del> <b>98</b>    |              |                   |
|                                       | (0.62)                                                | (0.59)                         | (0.66)                         |              |                   |
| Intensive Care                        | 202/ <del>333</del> <b>333</b>                        | 113/ <del>168</del> <b>168</b> | 78/ <del>142</del> <b>142</b>  |              | <b>0.03</b>       |
|                                       | (0.61)                                                | (0.67)                         | (0.55)                         |              |                   |
| Median hospitalization days           | 8 (6-14)                                              | 9 (6-15)                       | 8 (5-14.0)                     |              | 0.15              |
| Median days in Intensive Care         | 6 (3-10)                                              | 7 (4-11.0)                     | 6 (3-9)                        |              | 0.13              |
| <b>Viral Load Median</b>              | -                                                     | <b>57.41</b>                   | <b>27.35</b>                   |              | <b>0.03</b>       |

Formatted: Font: Bold, Font color: Auto

Formatted: Font: Bold, Font color: Auto

Formatted: Font: Bold, Font color: Auto

Formatted: Font: Bold

<sup>1</sup> Fisher's exact test.

<sup>2</sup> IQR: interquartil range.

309  
310

311 ~~Table 2 shows the clinical data comparison between subtypes. When compared~~  
 312 ~~to RSV-B, Patients affected by RSV-A showed a higher frequency of respiratory distress~~  
 313 ~~(n=154; 92% vs 80%, p= 0.002), and more often manifested O<sub>2</sub> saturation ≤95% (n=101;~~  
 314 ~~67% vs 51%, p= 0.009) when compared to RSV-B (O<sub>2</sub> saturation ≤95%: n=56; 51% and~~  
 315 ~~respiratory distress: n=96; 80%), and higher requirement for intensive care. The need for~~  
 316 ~~intensive care was higher in patients with RSV-A (n=113; 67% vs 55%, p= 0.03) than for~~  
 317 ~~those with RSV-B (78; 55%). Our data also indicate that patients affected by RSV-A, in~~  
 318 ~~median, stayed one day longer in hospital and in intensive care units than those affected~~  
 319 ~~by RSV-B, however yet, these data were not statistically significant. Lastly, RSV-A viral~~  
 320 ~~load showed more than twice the number of virus copies per cell (median=57.41~~  
 321 ~~copies/cell) than RSV-B (median=27.35 copies/cell). RSV-A CSS median was 4 and~~  
 322 ~~RSV-B's was 3, and children infected by RSV-A were most frequently were-classified in~~  
 323 ~~higher severity scores than those infected by RSV-B (Supplementary Table 34.). The~~  
 324 ~~S4 Table shows the difference in severity by ethnicity.~~

325  
 326 ~~Table 3. Clinical Severity Score (CSS): the score varied between 0 and 5. Higher values were~~  
 327 ~~assumed to represent more severe illness. Need for ICU, O<sub>2</sub>≤95%, length in hospital>5 days and~~  
 328 ~~requirement of O<sub>2</sub> therapy accounted for 1 point each. Need for mechanical ventilation accounted for 2~~  
 329 ~~points. Patients infected with RSV-A were most commonly classified into the most severe scores. The~~  
 330 ~~difference between viral loads was not related to severity, but there was no statistical significance.~~

| Clinical Severity Score (CSS) |                 |                 |              |                              |           |              |
|-------------------------------|-----------------|-----------------|--------------|------------------------------|-----------|--------------|
| CSS                           | RSV-A<br>n (%)  | RSV-B<br>n (%)  | p-value      | Viral load median (IQR)      | n         | p-value      |
| <b>0</b>                      | <b>1 (1%)</b>   | <b>10 (15%)</b> |              | <b>54.06 (6.12-603.61)</b>   | <b>8</b>  |              |
| <b>1</b>                      | <b>8 (8%)</b>   | <b>8 (12%)</b>  |              | <b>217.41 (96.38-370.56)</b> | <b>9</b>  |              |
| <b>2</b>                      | <b>19 (20%)</b> | <b>11 (17%)</b> |              | <b>41.18 (6.53-112.59)</b>   | <b>16</b> |              |
| <b>3</b>                      | <b>14 (15%)</b> | <b>15 (23%)</b> | <b>0,003</b> | <b>17.31 (6.33-125.40)</b>   | <b>14</b> | <b>0.089</b> |
| <b>4</b>                      | <b>26 (27%)</b> | <b>9 (14%)</b>  |              | <b>12.05 (4.32-36.63)</b>    | <b>9</b>  |              |
| <b>5</b>                      | <b>28 (29%)</b> | <b>13 (20%)</b> |              | <b>11.81 (1.14-54.24)</b>    | <b>18</b> |              |

- Formatted: English (United States)
- Formatted: Font: Bold
- Formatted: English (United States)
- Formatted: English (United States)
- Formatted: English (United States), Not Superscript/ Subscript
- Formatted: English (United States)
- Formatted: English (United States), Not Superscript/ Subscript
- Formatted: English (United States)
- Formatted: English (United States)
- Formatted Table

Formatted: Font: Bold, Font color: Auto

331

## Viral load-

A total of 156 (44%) samples were submitted to the viral load analysis (Table 34). According to age, the median viral load was higher in children with 4 to 6 months old (63.0 cop/cell,  $p=0.007$ ) than 0 to 3 (51.41 cop/cell), 7 to 12 (39.29 cop/cell), and 12 to 36 months old (7.77), with 0.007 p value. Comparing the RSV viral load and Regarding the patient clinical conditions, we found lower viral load in patients with fever (26.15 cop/cell) than those without it (111.29 cop/cell;  $p=0.00$ ) and higher viral load (70.24 cop/cell) In addition, in patients that had no without need for oxygen therapy presented higher viral load (70.24 cop/cell) than those who needed this therapy (22.69;  $p=0.02$ ). Deceased patients had lower viral load (2.80 cop/cell;  $p=0.02$ ) in comparison to the others (37.96 cop/cell). Although lacking statistical support ( $p=0.089$ ), a noteworthy observation is the tendency of lower viral load in patients with elevated CSS. The viral load analysis was performed regardless of the time between symptom onset and date of collection, which, in theory, could disturb alter the interpretation. However, of 156 samples used to measure viral titers, only 26 (16%) were collected 7 days after symptoms onset. A segmented analysis revealed very similar results when only samples collected until the 7th day of symptom onset were used. Therefore, we prefer to keep late collection patients in the analysis.

Table 34. Comparison of viral load values between gender, race, age, outcome and clinical condition. Statistically significant p-values are highlighted in red bold.

| Demographic data |        | N  | Median (IQR)        | p-value                  |
|------------------|--------|----|---------------------|--------------------------|
| Parameter        |        |    |                     |                          |
| Gender           | Male   | 78 | 51.40 (8.13-265.31) | 0.08                     |
|                  | Female | 78 | 24.63 (4.46-88.29)  |                          |
| Race             | White  | 52 | 54.30 (7.38-207.94) | 0.09 <sup>1</sup>        |
|                  | Brown  | 63 | 16.70 (4.78-84.83)  |                          |
|                  | Black  | 4  | 52.83 (0.30-241.27) |                          |
| Age (months)     | 0-3    | 86 | 51.40 (6.12-152.90) | <b>0.007<sup>1</sup></b> |

Formatted: Font: 16 pt

Formatted: Indent: First line: 0"

Formatted: Indent: First line: 0.49"

Formatted: Font: Bold, Font color: Auto

|                                       |                   |           |                       |                    |      |
|---------------------------------------|-------------------|-----------|-----------------------|--------------------|------|
|                                       | 4-6               | 22        | 63.09 (32.12-211.67)  |                    |      |
|                                       | 7-12              | 21        | 39.29 (2.32-236.91)   |                    |      |
|                                       | >12               | 26        | 7.77 (1.72-36.92)     |                    |      |
| <b>Outcome</b>                        | Recovery          | 130       | 37.96 (6.72-122.71)   | <b>0.02</b>        |      |
|                                       | Death             | 7         | 2.80 (0.04-21.49)     |                    |      |
| <b>Clinical data</b>                  |                   |           |                       |                    |      |
| <b>Fever</b>                          | Yes               | 121       | 26.15 (4.33-104.46)   | <b>0.00</b>        |      |
|                                       | No                | 27        | 111.29 (51.80-408.21) |                    |      |
| <b>Cough</b>                          | Yes               | 144       | 41.53 (4.86-148.15)   | 0.59               |      |
|                                       | No                | 7         | 11.52 (7.98-106.29)   |                    |      |
| <b>Dyspnea</b>                        | Yes               | 106       | 37.96 (3.91-154.88)   | 0.69               |      |
|                                       | No                | 40        | 42.05 (8.58-120.16)   |                    |      |
| <b>O<sub>2</sub> saturation ≤ 95%</b> | Yes               | 71        | 26.41 (3.95-150.65)   | 0.40               |      |
|                                       | No                | 51        | 50.16 (8.36-196.81)   |                    |      |
| <b>Respiratory distress</b>           | Yes               | 115       | 39.29 (4.78-150.13)   | 0.27               |      |
|                                       | No                | 18        | 75.69 (12.66-214.26)  |                    |      |
| <b>Days of hospitalization</b>        | 1-4               | 20        | 79.36 (11.10-245.08)  | 0.20 <sup>1</sup>  |      |
|                                       | 5-8               | 49        | 39.45 (11.89-176.21)  |                    |      |
|                                       | >8                | 54        | 24.42 (4.08-78.04)    |                    |      |
| <b>Ventilatory support</b>            | No                | 48        | 70.24 (11.41-342.96)  | <b>0.02</b>        |      |
|                                       | Yes (total)       |           | 22.69                 |                    |      |
|                                       | Yes - noninvasive | 65        | 26.41 (6.26-105.11)   |                    | 0.35 |
|                                       | Yes - invasive    | 40        | 17.31 (3.95-68.70)    |                    |      |
| <b>Intensive Care</b>                 | Yes               | 82        | 30.01 (4.41-113.44)   | 0.73               |      |
|                                       | No                | 67        | 39.29 (6.90-154.61)   |                    |      |
| <b>Days of Intensive Care</b>         | 1-4               | 20        | 34.74 (3.60-226.28)   | 0.547 <sup>1</sup> |      |
|                                       | 5-8               | 16        | 16.27 (2.09-106.22)   |                    |      |
|                                       | >8                | 24        | 36.24 (9.10-106.65)   |                    |      |
| <b>Days of symptom until collect</b>  | 0-3               | 51        | 36.63 (5.99-220.48)   | 0.19 <sup>1</sup>  |      |
|                                       | 4-6               | 67        | 39.98 (7.65-135.24)   |                    |      |
|                                       | 7-9               | 24        | 19.98 (0.53-77.39)    |                    |      |
|                                       | >9                | 12        | 10.45 (3.92-50.98)    |                    |      |
| <b>Subtype</b>                        | <u>RSV-A</u>      | <u>64</u> | <u>57.41</u>          | <b>0.03</b>        |      |
|                                       | <u>RSV-B</u>      | <u>76</u> | <u>27.35</u>          |                    |      |

<sup>1</sup> Kruskal-Wallis test.

<sup>2</sup> IQR: interquartil range.

Formatted: Font: Bold, Font color: Auto

Formatted: Font: Bold

Formatted: Font: Bold, Font color: Auto

Formatted: Font: Bold, Font color: Auto

Formatted: Font: Bold

Formatted: English (United States)

Formatted: English (United States)

Formatted: English (United States)

Formatted: Font: Bold, Font color: Auto

Formatted: Centered

Formatted: Font: Bold, English (United States)

Formatted Table

Formatted: Font: 16 pt

Formatted: Indent: First line: 0"

353

## 354 **Viral seasonality and climatic analysis.**

355 - \_\_\_\_ In 2016 and 2017, ~~the~~ RSV season started in the 12<sup>th</sup> EW (March, early fall  
 356 season), peaked between the 16<sup>th</sup>-20<sup>th</sup> EW and ~~the seasonality reached its ended~~ in the  
 357 winter season, between the 31<sup>th</sup>-32<sup>th</sup> EW (Figure 1; Supplementary S5 Table 6). In



358 2018, the beginning of RSV seasonality was anticipated, with the first cases occurring in  
359 3<sup>th</sup> EW, (January, in the middle of summer). ~~The p~~Peak happened in 14<sup>th</sup> EW and the end  
360 ~~of seasonality~~ occurred in 27<sup>th</sup> EW. Thus, the RSV seasonal period in 2016, 2017 and  
361 2018 lasted ~~21-20~~, ~~18-19~~ and ~~23-24~~ weeks, respectively.

362

363 **Fig 1. Circulation of RSV-A and RSV-B between 2016 and 2018 in Espirito Santo State.** The X-axis  
364 shows the epidemiological weeks (EW) for each year. The primary Y axis displays the number of positive  
365 cases for each of the subtypes and the secondary Y axis shows the values of the climatic variables. The gray  
366 zone indicates the total number of samples tested in each EW.

367

368 Precipitation rate and relative humidity percentage have not been shown to  
369 influence the distribution of RSV cases by Spearman's correlation test ( $p = 0.55$  and  $0.11$ ,  
370 respectively). The mean temperature, however, showed a minor and inverse correlation  
371 with RSV infections ( $-0.16$ ;  $p = 0.05$ ).

372 Although RSV-A and RSV-B co-circulated in each year, it is noteworthy ~~that how~~  
373 the subtype distribution changed over the years. In 2016, RSV-B predominated ( $n=80$ ;  
374  $58\%$ ) over RSV-A ( $n=58$ ;  $42\%$ ). In 2017 this difference increased, and RSV-B was  
375 responsible for  $82\%$  of the cases ( $n=63$ ). Finally, in 2018, there was a shift in this pattern  
376 and almost all RSV cases were caused by RSV-A ( $n=108$ ;  $96\%$ ). Only four cases were  
377 related to RSV-B.

378

### 379 **Phylogeny of RSV and genetic analysis.**

380 The phylogenetic reconstructions revealed 36 RSV-A classified such as GA2.  
381 ON1 genotype, and 21 RSV-B, BA genotype, based on 2<sup>nd</sup> HVR (**S1 and S2**  
382 **Figsupplementary Figure 1 and Supplementary Figure 2**). Some local genetic groups  
383 of both genotypes and a slightly higher diversity among the RSV-A strains ( $p$ -distance =

Formatted: Font: 16 pt, Bold

Formatted: Indent: First line: 0"

Formatted: Font: 16 pt

Formatted: Indent: First line: 0.49"

384 1.8%) were observed in comparison to RSV-B (p-distance = 1.6%) (**Figure 2 and**  
385 **Figure 3**).

386

387 **Fig 2. RSV-A phylogenetic tree.** The tree was built using maximum likelihood method on MEGA 6.0  
388 software from a MUSCLE alignment of G gene sequences of 711 bp. Previously published sequences from  
389 known genotypes were retrieved from NCBI database. The ES strains that were sequenced in this work are  
390 highlighted in bold. Numbers from 1 to 5 within the squares indicate the patients' CSS. The cross indicates  
391 patients who died due to RSV infection. The stars indicate viral load, categorized by color (in copies per  
392 cell).  
393

394 **Fig 3. RSV-B phylogenetic tree.** The tree was built using maximum likelihood method on MEGA 6.0  
395 software from a MUSCLE alignment of G gene sequences of 726 bp. Previously published sequences from  
396 known genotypes were retrieved from NCBI database. The ES strains that were sequenced in this work are  
397 highlighted in bold. Numbers from 1 to 5 within the squares indicate the patients' CSS. The cross indicates  
398 patients who died due to RSV infection. The stars indicate viral load, categorized by color (in copies per  
399 cell).  
400

401 RSV-A ES Brazilian strains ~~from ES state~~, from 2016 to 2018, are clustered with  
402 strains that circulated in North America, South America, Asia, Africa and Oceania, from  
403 2011 to 2018. A Brazilian main local cluster BR.1 (L142S, L274P, Y304H and T320A)  
404 was observed circulating from 2016 to 2018 in ES state. However two new subclusters,  
405 BR.1.1 (E106G,) and BR.1.2 (N103T, S144I, E224V, S270P and/or P298L) were  
406 detected co-circulating in ES state in 2018. Amino acid substitutions compared with the  
407 RSV-A GA2.ON1 reference strain (JN257693) can be observed in the **Supplementary**  
408 **Table 7**. The average CSS inside BR.1 cluster was 2.84, while the average in the rest of  
409 BR strains was 3.78, showing that BR.1 cluster may be associated with lower severity  
410 disease than the other strains. ~~The~~ Viral load, ~~on the other hand~~, seemed to be higher on  
411 ~~the~~ BR.1 strains when compared to ~~other~~ the rest of Brazilian strains.

412 ~~The RSV-B gene G~~ phylogenetic reconstruction ~~of RSV B gene G~~ (**Figure 3**)  
413 revealed that Brazilian strains from 2016 to 2018 belonged to a cluster containing global  
414 strains circulating from 1999 to 2018. ES Brazilian strains ~~from ES state~~ were distributed  
415 through this main cluster, and ~~they~~ presented punctual amino acid substitutions, some of

416 them with potential loss of O-glycosylation, such as T229N and/or S287F (strains from  
417 2017). ~~Inside~~Into this the main cluster, some local subclusters were observed, such as  
418 BR.1 (S101G loss glycosylation site, P217L and T248A loss glycosylation site) e BR.2  
419 (G136S and S269P) in samples from 2016, revealing the large diversity among ~~the~~ RSV-  
420 B virus circulating in the ES State during that year. Additionally two strains from 2017  
421 presented an insertion of three nucleotides at codon 228. All these amino acid substitutions  
422 compared with the RSV-B BA reference strain (AY333364) are described in  
423 **S7**~~upplementary~~ **Table 8**. CSS and viral load data were unavailable for most of RSV-B  
424 sequences, ~~therefore~~s, we could not compare those data with the genetic strains  
425 observed.

## 426 Discussion

Formatted: Font: 18 pt

427 In this paper we investigated RSV features ~~of using Brazilian Influenza~~  
428 ~~Surveillance Program~~the Brazilian Influenza Surveillance System and addressed some  
429 RSV issues listed in the WHO global RSV surveillance pilot objectives [16], such as RSV  
430 burden in hospitalized children and mapping of local seasonality. Additionally, we  
431 describe the molecular characteristics of gene G and it revealed RSV-A and RSV-B local  
432 clusters co-circulating in Brazil.

### 434 **RSV is prevalent in Brazilian children with SARI.**

Formatted: Font: 16 pt, Bold

Formatted: Font: 16 pt

Formatted: Font: 16 pt, Bold

Formatted: Indent: First line: 0"

Formatted: Font: 16 pt

435 RSV prevalence in different Brazilian regions is highly diverse, ranging from 7.7% to  
436 77.6% [25–27]. In the ES state, from 2016 to 2018, the prevalence in hospitalized children  
437 up to 3 years-old was 56%. These differences are probably related to the use of diverse  
438 methods of RSV detection (*e.g.* RT-PCR or immunofluorescence) or patient inclusion  
439 criteria (*e.g.* age, symptoms, period of the year). During 1997-98 season, Checon *et al.*

440 found a prevalence of 28% in the capital of ES State [27]. This lower prevalence in  
441 comparison to our study can be attributed to the less sensitive method used  
442 (immunofluorescence) and a broader target population age (children  $\leq 5$  years old).

443 In our study, the median age of four months in hospitalized children with RSV  
444 confirms the higher prevalence in children younger than one year old [2], which justifies  
445 why RSV vaccine candidates are aiming to protect, primarily, infants and young children  
446 [7].

447

448 **The subtype but not the viral load appears to be associated with**  
449 **the severity of the disease.**

Formatted: Font: 16 pt, Bold

Formatted: Font: 16 pt

450 Regarding RSV infection, it can cause a range of clinical outcomes [2], but the factors  
451 attributed to a worst outcome remain unclear [3,4]. Several studies have shown that male  
452 gender is a risk factor for a RSV infection [2], while others have not observed such a  
453 connection [37]. Although without statistical significance, we observed that male children  
454 were slightly more affected than female, which could support the hypothesis that male  
455 children are at higher risk. Nevertheless, the CSS median was three for both genders.

456 Some evidences suggest that Afro-descendant children are more resistant to RSV  
457 infection than white children. [37]. In contrast, in our study, brown and black children  
458 stayed longer periods in hospital and ICU, had lower oxygen saturation and used oxygen  
459 therapy and mechanical ventilation more often than white children (S4 ~~supplementary~~  
460 Table-5). In addition, the prevalence of SARI caused by RSV was higher in Brazilian  
461 brown children (54%). However, it is important to consider that miscegenation of  
462 Brazilian population shows a high degree of ancestry heterogeneity both for  
463 mitochondrial and genomic DNA [38]. According to the Brazilian Institute of Geography  
464 and Statistics (IBGE), blacks and browns make up for the majority of the poverty group

465 in Brazil [39]. RSV lethality appears to be, at least in part, associated with socio-economic  
466 conditions, since the lethality of RSV infection in developing countries is seven fold the  
467 rate in industrialized countries [40]. Low income implies less access to basic conditions  
468 and health services, which may explain our findings.

469 Although some authors have found no correlation between subtypes and disease  
470 severity [41,42], many others revealed RSV-A as the most virulent subtype  
471 [9,10,12,43,44]. Here, we have found that children hospitalized due to SARI with RSV-  
472 A infection revealed a higher clinical score index (CSS median=4) – therefore, a more  
473 severe disease – when compared to those with RSV-B (CSS median=3). Children  
474 infected by RSV-A required O<sub>2</sub> therapy more often than those infected by RSV-B and, of  
475 all children who needed O<sub>2</sub> therapy, those affected by subgroup A needed mechanical  
476 ventilation more frequently. Although these data did not have statistical support, other  
477 studies found the same connection [9,10]. Our data also shows that children infected by  
478 subgroup A required ICU more often (p=0.03) and remained hospitalized and in ICU a  
479 day longer, on average, when compared to those infected by RSV-B, which is agreement  
480 with previous studies [44,45]. Notwithstanding, we highlight that only one genotype was  
481 found for each subtype (ON1 and BA), thus, those differences in severity could be a  
482 consequence of differences in genotypes virulence, rather than subtypes.

483 The correlation between disease severity and viral load remains controversial.  
484 While several authors have shown that the severity of the infection follows the viral load  
485 [46,4,5,47], others have not [7,12,42]. Some studies found associations between viral load  
486 and symptom frequency, but not severity itself [48,49]. Viral load measurement methods  
487 are widely variable between studies: some authors use plaque assay [4] or semi-  
488 quantitative analyses, such as ct [5,7,41], others use quantitative methods [47–50].  
489 Moreover, most studies that use quantitative methods do not normalize the measurements.

490 Respiratory samples are naturally heterogeneous and the collection technique can  
491 influence viral genome concentration [47].

492 ~~\_\_\_\_\_~~ ~~In this study~~ ~~We~~ used a standardized method for measuring viral load.  
493 Interestingly, we found lower viral load in patients with fever (p=0.00), with need of  
494 ventilatory support (p=0.02) and in those who died (p=0.02). Our data are in conflict with  
495 previous studies that demonstrated a positive association between viral load and the  
496 presence of cough, fever [48] and the need for intubation [46]. However, ~~supporting our~~  
497 ~~results~~, two recent studies observed higher viral load in less severe RSV disease [51,52].  
498 Piedra *et al.* observed a positive correlation between viral load and mucosal concentration  
499 of proinflammatory cytokines that may suggest that high RSV loads can protect from  
500 disease progression due to the promotion of an early robust innate immune response  
501 [51,52]. Conflicting results between studies could be attributed to the different methods  
502 used to calculate viral load, various study designs and indicators of disease severity.

503

504 **The seasonal period of RSV may fluctuate and its circulation is**  
505 **slightly associated with temperature.**

Formatted: Font: 16 pt, Bold

Formatted: Indent: First line: 0"

Formatted: Font: Bold

506 ~~Regarding the RSV seasonality,~~ In temperate countries, RSV peak activity occurs in the  
507 winter and several studies have shown the connection between cold temperatures and  
508 widespread RSV viral circulation [29]. In contrast, in tropical countries there is a wide  
509 range of variability in the timing and duration of epidemics and the correlation between  
510 climatic factors and viral activity is controversial [20,30]. Although in the Southern  
511 Hemisphere RSV wave usually starts between March and June and decreases between  
512 August and October [20], in Brazil, a continental country with five geographic regions, a  
513 wide variation in the seasonality is seen, such as those observed in northeastern [31] and  
514 southern [32] regions.

515 Here we showed that RSV's activity were very similar between 2016 and 2017  
516 seasons, with the circulation onset occurring in March (EW 12), at early fall, ~~peak in May~~  
517 ~~(EW 16-20)~~ and end in July/August (EW ~~30-31-and-3332~~), during the winter season.  
518 These data are in accord with the Brazilian Society of Pediatrics, which recommends the  
519 administration of Palivizumab from February to July [28]. ~~Notwithstanding Nonetheless,~~  
520 in 2018, we observed an anticipation of the seasonality onset by nine weeks, with the  
521 beginning of circulation occurring in January (Ssummer season) and with the end taking  
522 place in the #Fall instead of Wwinter.

Formatted: English (United States)

523 ~~In temperate countries, RSV peak activity occurs in the winter and several studies~~  
524 ~~have shown the connection between cold temperatures and widespread RSV circulation~~  
525 ~~[29]. In contrast, in tropical countries there is a wide range of variability in the timing and~~  
526 ~~duration of epidemics and the correlation between climatic factors and viral activity is~~  
527 ~~controversial [20,30]. Although in the Southern Hemisphere RSV wave usually starts~~  
528 ~~between March and June and decreases between August and October [20], in Brazil, a~~  
529 ~~continental country with five geographic regions, a wide variation in the seasonality is~~  
530 ~~seen, such as those observed in northeastern [31] and southern [32] regions. In the~~  
531 southeastern region it was observed that RSV the peak of RSV usually happens in early  
532 April [33]. Our data shows point that in 2016-~~2017~~ the RSV peak occurred in May, which  
533 shows suggesting subtle differences even inside the same geographical region. In 2018  
534 there was an extension of RSV's seasonality duration ~~In 2018, we observed an~~  
535 ~~anticipation of the seasonality onset by nine weeks, with the beginning of circulation~~  
536 ~~occurring in January (summer season), extending the duration of RSV season by 34.5~~  
537 weeks when compared to the ~~RSV circulation~~ average in 2016-2017. ~~This Those~~  
538 observations are is especially worrisome, since major variations could make a preventive  
539 measure harder to implement. Understanding local epidemics is important ~~in~~ managing

Formatted: Not Highlight

Formatted: Not Highlight

Formatted: Not Highlight

540 ~~time of~~ prophylaxis ~~at the right time~~, to support vaccine development and to follow  
541 morbidity and mortality caused by RSV infection [29], thus, establishing RSV  
542 surveillance in real time may allow ~~for~~ the identification of patterns and possible variation  
543 in ~~opportune prophylaxis~~ time. RSV seasonality usually lasts five to six months [20]. In  
544 our study, the longest seasonal period occurred in 2018 (~~5.756~~ months), followed by 2016  
545 (~~5.25~~ months) and 2017 (4.75 months). Interestingly, the prevalence of RSV-A was high  
546 in 2018 (96%), medium in 2016 (41%) and low in 2017 (18%). These data reinforce the  
547 theory that RSV-A may lengthen the seasonality [34].

548 Climatic factors, such as humidity, rainfall and temperature have been assumed to  
549 impact RSV seasonality [29,35]. However, this association remains controversial. An  
550 inverted correlation between RSV circulation, temperature and humidity was observed in  
551 a Brazilian study, carried out in São Paulo State [36]. In this study, a minor correlation  
552 was found between ~~the temperature~~ decrease ~~in temperature~~ and ~~case number~~ the increase  
553 ~~in the number of cases~~. However, no correlation was found concerning humidity or  
554 precipitation.

555 ~~Regarding RSV infection, it can cause a range of clinical outcomes [2], but the~~  
556 ~~factors attributed to a worst outcome remain unclear [3,4]. Several studies have shown~~  
557 ~~that male gender is a risk factor for a RSV infection [2], while others have not observed~~  
558 ~~such a connection [37]. Although without statistical significance, we observed that male~~  
559 ~~children were slightly more affected than female, which could support the hypothesis that~~  
560 ~~male children are at higher risk. Nevertheless, the CSS median was three for both genders.~~  
561 ~~Some evidences suggest that Afro-descendant children are more resistant to RSV~~  
562 ~~infection than white children. [37]. In contrast, in our study, brown and black children~~  
563 ~~stayed longer periods in hospital and ICU, had lower oxygen saturation and used oxygen~~  
564 ~~therapy and mechanical ventilation more often than white children (Supplementary~~

Formatted: HTML Preformatted, Indent: First line: 0",  
Adjust space between Latin and Asian text, Adjust space  
between Asian text and numbers



565 ~~Table 5). In addition, the prevalence of SARI caused by RSV was higher in Brazilian~~  
566 ~~brown children (54%). However, it is important to consider that miscegenation of~~  
567 ~~Brazilian population shows a high degree of ancestry heterogeneity both for~~  
568 ~~mitochondrial and genomic DNA [38]. According to the Brazilian Institute of Geography~~  
569 ~~and Statistics (IBGE), blacks and browns make up for the majority of the poverty group~~  
570 ~~in Brazil [39]. RSV lethality appears to be, at least in part, associated with socio-economic~~  
571 ~~conditions, since the lethality of RSV infection in developing countries is seven fold the~~  
572 ~~rate in industrialized countries [40]. Low income implies less access to basic conditions~~  
573 ~~and health services, which may explain our findings.~~

574 ~~Although some authors have found no correlation between subtypes and disease~~  
575 ~~severity [41,42], many others revealed RSV A as the most virulent subtype~~  
576 ~~[9,10,12,43,44]. Here, we found that children hospitalized due SARI with RSV A~~  
577 ~~infection revealed a higher clinical score index (CSS median = 4) therefore, a more~~  
578 ~~severe disease when compared to those with RSV B (CSS median = 3). Children~~  
579 ~~infected by RSV A required O<sub>2</sub> therapy more often than those infected by RSV B and, of~~  
580 ~~all children who needed O<sub>2</sub> therapy, those affected by subgroup A needed mechanical~~  
581 ~~ventilation more frequently. Although these data did not have statistical support, other~~  
582 ~~studies found the same connection [9,10]. Our data also shows that children infected by~~  
583 ~~subgroup A required ICU more often (p = 0.03) and remained hospitalized and in ICU a~~  
584 ~~day longer, on average, when compared to those infected by RSV B, which is agreement~~  
585 ~~with previous studies [44,45]. Notwithstanding, we highlight that only one genotype was~~  
586 ~~found for each subtype (ON1 and BA), thus, those differences in severity could be a~~  
587 ~~consequence of differences in genotypes virulence, rather than subtypes.~~

588 ~~The correlation between disease severity and viral load remains controversial.~~  
589 ~~While several authors have shown that the severity of the infection follows the viral load~~

590 ~~[46,45,47], others have not [7,12,42]. Some studies found associations between viral load~~  
591 ~~and symptom frequency, but not severity itself [48,49]. Viral load measurement methods~~  
592 ~~are widely variable between studies: some authors use plaque assay [4] or semi-~~  
593 ~~quantitative analyses, such as *et al.* [5,7,41], others use quantitative methods [47-50].~~  
594 ~~Moreover, most studies that use quantitative methods do not normalize the measurements.~~  
595 ~~Respiratory samples are naturally heterogeneous and the collection technique can~~  
596 ~~influence viral genome concentration [47].~~

Formatted: English (United States)

Formatted: English (United States)

597 ~~———— We used a standardized method for measuring viral load. Interestingly, we found~~  
598 ~~lower viral load in patients with fever (p=0.00), with need of ventilatory support (p=0.02)~~  
599 ~~and in those who died (p=0.02). Our data are in conflict with previous studies that~~  
600 ~~demonstrated a positive association between viral load and the presence of cough, fever~~  
601 ~~[48] and the need for intubation [46]. However, supporting our results, two recent studies~~  
602 ~~observed higher viral load in less severe RSV disease [51,52]. Piedra *et al.* observed a~~  
603 ~~positive correlation between viral load and mucosal concentration of proinflammatory~~  
604 ~~cytokines that may suggest that high RSV loads can protect from disease progression due~~  
605 ~~to the promotion of an early robust innate immune response [51,52]. Conflicting results~~  
606 ~~between studies could be attributed to the different methods used to calculate viral load,~~  
607 ~~various study designs and indicators of disease severity.~~

609 **ON1 and BA were the only genotypes detected.**

Formatted: Font: 16 pt

Formatted: Indent: First line: 0"

610 ~~Regarding molecular characterization, a~~All RSV-A isolates were ON1 genotype and all  
611 RSV-B were BA, which confirm the fast-global dissemination of RSV with nucleotide  
612 duplication. ~~These findings are and are~~ consistent with recent published reports performed  
613 in other countries, such as Philippines [53], Kenya [54], Italy [55], USA and Puerto Rico  
614 [56].

Formatted: English (United States)

615 Overall p-distance during the study period in RSV-A was 1.8%. A recent study  
616 observed an overall p-distance of 1.4% within ON1 [13]. A noteworthy observation is the  
617 fact that in 2017 we found the lowest prevalence of RSV-A in ES (18%), and, still, the  
618 highest genetic diversity. Phylogeny showed that 2017 strains were distributed in almost  
619 all genetic clusters, which showed high diversity that year. RSV-A phylogenetic analysis  
620 revealed ongoing genetic changes, with BR.1 grouping most recent strains, suggesting  
621 that BR.1 strains may be under positive selective pressure. Changes in the circulation of  
622 RSV strains have been considered a mechanism for evading immune response generated  
623 by previous strains, which possibly allows for re-infections to occur [57].

~~624 Some evidences show that the replicative ability and, therefore, the viral load,  
625 are driven by viral genetic factors, which explains why some genetic groups exhibit low  
626 viral loads while others show high viral loads [58]. We noticed that BR.1 grouped many  
627 strains that showed moderate/high viral titer, while others exhibit lower viral loads. The  
628 lower CSS found in BR.1, compared to other strains, strengthens the inversely  
629 proportional link between severity and viral load and suggests that 2018 circulating  
630 strains were less virulent. However, more studies with a larger sample size are needed to  
631 confirm this hypothesis.~~

632 As demonstrated, in 2018 RSV-B was responsible for only 4% of cases.  
633 Therefore, phylogenetic analysis did not include any RSV-B samples from that year.  
634 Older strains, from 2009 to 2014, are positioned at the base of the BA cluster, however,  
635 sample strains collected between 2015 and 2018 did not form genetic groups related to  
636 the year of collection. This observation may suggest an absence of positive pressure.  
~~637 Since few strains sequenced from RSV B had their viral load measured, it was not  
638 possible to analyze the distribution of viral titer among clades.~~

639 Although we found clusters composed exclusively of ES samples, it is necessary  
640 to expand the sequencing of RSV samples globally in order to verify if there is in fact the  
641 formation of local genetic groups or if the observation is caused by a sample bias.

642 Previous studies show that a large part of the genetic variability between RSV  
643 strains comes from changes in O-glycosylation profile and that this may be associated  
644 with an evolutionary mechanism of immune response evasion [59]. Here, we investigated  
645 and listed strain amino acid substitutions and also those shared within and between  
646 clusters. However, we did not carry out in-depth analysis in order to understand the role  
647 of these mutations, therefore, our objective was purely observational. Among the  
648 mutations found, one of the most interesting was the insertion of three nucleotides at codon  
649 228 in RSV-B. Further studies are essential to understand virus evolution and  
650 pathogenicity mutation consequences.

651 Limitations of this study include the fact that the majority of patients had an acute  
652 infection, thus, the prevalence found refers only to SARI, and the absence of a mild  
653 infection group prevents further analysis of severity influencing factors. Lastly, clinical  
654 data were taken from notification forms, which often show inconsistencies and missing  
655 data. Despite those caveats, we believe the data provide valuable epidemiological, genetic  
656 and clinical information on RSV.

657

## 658 **Conclusion**

659 In this study we observed a high prevalence of RSV in children under three years  
660 old even when using the Brazilian Influenza surveillance-Surveillance systemProgram.  
661 This result is important because it shows that the establishment of global RSV  
662 surveillance within the Influenza surveillance system allows for the detection of a large

Formatted: Font: 18 pt

663 number of cases.- Our data suggest that RSV-A is, in fact, more virulent than RSV-B.  
664 Notably, no correlation between viral load and disease severity was observed. The  
665 observation of an important anticipation of the seasonal period is worrisome, since this  
666 can make it difficult to administer prophylactic measures at the right time, however, it is  
667 necessary to expand the historical series of seasonality in Espirito Santo. The average  
668 temperature was the only climatic factor to show interference with the viral circulation.  
669 Our data show the annual co-circulation of RSV-A and RSV-B, however, with  
670 considerable fluctuations in the prevalence of subtypes. ON1 and BA were the only ones  
671 found in the studied period, which corroborates with a series of recent studies. The  
672 establishment of a global and standardized real time RSV surveillance may allow for the  
673 collection of data that will help understanding the complex mechanisms of viral evolution  
674 and will facilitate the development of future vaccines and antiviral drugs. RSV continues  
675 to lead the cause of hospitalizations for pneumonia in children worldwide, being  
676 responsible for a large fraction of morbidity and mortality in the pediatric population.

677

## 678 **Acknowledgments**

Formatted: Font: 18 pt

679 We would like to thank Liliana Cruz Spano for her significant theoretical and  
680 experimental support to this work, all researchers who upload genetic sequences in the  
681 public genetic database – GenBank, patients, parents and guardians, the Espirito Santo  
682 State Health Department and the Brazilian Ministry of Health, represented by the  
683 Influenza Technical Group.

684

## 685 **References**

Formatted: Font: 18 pt

- 686 1. Hall CB, Weinberg GA, Iwane MK, Blumkin AK, Edwards KM, Staat MA, et al.  
687 The Burden of Respiratory Syncytial Virus Infection in Young Children. *N Engl J*  
688 *Med.* 2009;360: 588–598. doi:10.1056/NEJMoa0804877
- 689 2. Borchers AT, Chang C, Gershwin ME, Gershwin LJ. Respiratory Syncytial Virus  
690 —A Comprehensive Review. *Clin Rev Allergy Immunol.* 2013;45: 331–379.  
691 doi:10.1007/s12016-013-8368-9
- 692 3. Collins PL, Graham BS. Viral and Host Factors in Human Respiratory Syncytial  
693 Virus Pathogenesis. *J Virol.* 2008;82: 2040–2055. doi:10.1128/JVI.01625-07
- 694 4. El Saleeby CM, Bush AJ, Harrison LM, Aitken JA, DeVincenzo JP. Respiratory  
695 Syncytial Virus Load, Viral Dynamics, and Disease Severity in Previously Healthy  
696 Naturally Infected Children. *J Infect Dis.* 2011;204: 996–1002.  
697 doi:10.1093/infdis/jir494
- 698 5. Hasegawa K, Jarti T, Mansbach JM, Laham FR, Jewell AM, Espinola JA, et al.  
699 Respiratory Syncytial Virus Genomic Load and Disease Severity Among Children  
700 Hospitalized With Bronchiolitis: Multicenter Cohort Studies in the United States  
701 and Finland. *J Infect Dis.* 2015;211: 1550–1559. doi:10.1093/infdis/jiu658
- 702 6. Resa C, Magro S, Marechal P, Barranger C, Joannes M, Mischczak F, et al.  
703 Development of an efficient qRT-PCR assay for quality control and cellular  
704 quantification of respiratory samples. *J Clin Virol.* 2014;60: 270–275.  
705 doi:10.1016/j.jcv.2014.03.019
- 706 7. Mazur NI, Higgins D, Nunes MC, Melero JA, Langedijk AC, Horsley N, et al. The  
707 respiratory syncytial virus vaccine landscape: lessons from the graveyard and  
708 promising candidates. *Lancet Infect Dis.* 2018;18: e295–e311. doi:10.1016/S1473-  
709 3099(18)30292-5
- 710 8. Mufson MA, Orvell C, Rafnar B, Norrby E. Two Distinct Subtypes of Human  
711 Respiratory Syncytial Virus. *J Gen Virol.* 1985;66: 2111–2124.  
712 doi:https://doi.org/10.1099/0022-1317-66-10-2111
- 713 9. McConnochie KM, Hall CB, Walsh EE, Roghmann KJ. Variation in severity of  
714 respiratory syncytial virus infections with subtype. *J Pediatr.* 1990;117: 52–62.  
715 doi:10.1016/S0022-3476(05)82443-6
- 716 10. Walsh EE, McConnochie KM, Long CE, Hall CB. Severity of Respiratory  
717 Syncytial Virus Infection Is Related to Virus Strain. *J Infect Dis.* 1997;175: 814–  
718 820. doi:10.1086/513976
- 719 11. Hornsleth A, Klug B, Nir M, Johansen J, Hansen K, Christensen L, et al. Severity  
720 of respiratory syncytial virus disease related to type and genotype of virus and to  
721 cytokine values in nasopharyngeal secretions. *Pediatr Infect Dis J.* 1998;17: 1114–  
722 1121. doi:10.1097/00006454-199812000-00003
- 723 12. Kim Y-I, Murphy R, Majumdar S, Harrison LG, Aitken J, DeVincenzo JP.  
724 Relating plaque morphology to respiratory syncytial virus subgroup, viral load,  
725 and disease severity in children. *Pediatr Res.* 2015;78: 380–388.  
726 doi:10.1038/pr.2015.122

- 727 13. Muñoz-Escalante JC, Comas-García A, Bernal-Silva S, Robles-Espinoza CD,  
728 Gómez-Leal G, Noyola DE. Respiratory syncytial virus A genotype classification  
729 based on systematic intergenotypic and intragenotypic sequence analysis. *Sci Rep*.  
730 2019;9: 20097. doi:10.1038/s41598-019-56552-2
- 731 14. Trento A, Viegas M, Galiano M, Videla C, Carballal G, Mistchenko AS, et al.  
732 Natural History of Human Respiratory Syncytial Virus Inferred from Phylogenetic  
733 Analysis of the Attachment (G) Glycoprotein with a 60-Nucleotide Duplication. *J*  
734 *Virool*. 2006;80: 975–984. doi:10.1128/JVI.80.2.975-984.2006
- 735 15. Eshaghi A, Duvvuri VR, Lai R, Nadarajah JT, Li A, Patel SN, et al. Genetic  
736 Variability of Human Respiratory Syncytial Virus A Strains Circulating in  
737 Ontario: A Novel Genotype with a 72 Nucleotide G Gene Duplication. *PLoS ONE*.  
738 2012;7: e32807. doi:10.1371/journal.pone.0032807
- 739 16. WHO strategy to pilot global respiratory syncytial virus surveillance based on the  
740 Global Influenza Surveillance and Response System (GISRS). Geneva: World  
741 Health Organization; 2017. Licence: CC BY-NC-SA 3.0 IGO.
- 742 17. Brasil. Panorama do Espírito Santo [cited 27 September 2020]. In Instituto  
743 Brasileiro de Geografia e Estatística (IBGE) [Internet]. Available from:  
744 <https://cidades.ibge.gov.br/brasil/es/panorama>.
- 745 18. Brasil. Gripe (influenza): causas, sintomas, tratamento, diagnóstico e prevenção.  
746 [cited 08 September 2020]. In: Brazilian Ministry of Health [Internet]. Available  
747 from: <https://antigo.saude.gov.br/saude-de-a-z/gripe/#boletins>.
- 748 19. Martinello RA, Chen MD, Weibel C, Kahn JS. Correlation between Respiratory  
749 Syncytial Virus Genotype and Severity of Illness. *J Infect Dis*. 2002;186: 839–842.  
750 doi:10.1086/342414
- 751 20. Obando-Pacheco P, Justicia-Grande AJ, Rivero-Calle I, Rodríguez-Tenreiro C, Sly  
752 P, Ramilo O, et al. Respiratory Syncytial Virus Seasonality: A Global Overview.  
753 2018; 217(9): 1356-1364. doi:10.1093/infdis/jiy056.
- 754 21. Álvarez-Argüelles ME, Oña-Navarro M de, Rojo-Alba S, Torrens-Muns M,  
755 Junquera-Llaneza ML, Antonio-Boga J, et al. Quantification of human papilloma  
756 virus (HPV) DNA using the Cobas 4800 system in women with and without  
757 pathological alterations attributable to the virus. *J Virol Methods*. 2015;222: 95–  
758 102. doi:10.1016/j.jviromet.2015.05.016
- 759 22. Sequencher® - DNA sequence analysis software. Ann Arbor, MI USA: Gene  
760 Codes Corporation;
- 761 23. Tamura K, Stecher G, Peterson D, Filipski A, Kumar S. MEGA6: Molecular  
762 Evolutionary Genetics Analysis Version 6.0. *Mol Biol Evol*. 2013;30: 2725–2729.  
763 doi:10.1093/molbev/mst197
- 764 24. Guindon S, Gascuel O. A Simple, Fast, and Accurate Algorithm to Estimate Large  
765 Phylogenies by Maximum Likelihood. *Syst Biol*. 2003;52: 696–704.  
766 doi:10.1080/10635150390235520

- 767 25. Gardinassi L, Simas P, Gomes D, Bonfim C, Nogueira F, Garcia G, et al. Diversity  
768 and Adaptation of Human Respiratory Syncytial Virus Genotypes Circulating in  
769 Two Distinct Communities: Public Hospital and Day Care Center. *Viruses*.  
770 2012;4: 2432–2447. doi:10.3390/v4112432
- 771 26. Vieira SE, Thomazelli LM, de Paulis M, Ferronato AE, Oliveira DB, Martinez  
772 MB, et al. Infections Caused by HRSV A ON1 Are Predominant among  
773 Hospitalized Infants with Bronchiolitis in São Paulo City. *BioMed Res Int*.  
774 2017;2017: 1–7. doi:10.1155/2017/3459785
- 775 27. Checon RE, Siqueira MM, Lugon AK, Portes S, Dietze R. Short report: seasonal  
776 pattern of respiratory syncytial virus in a region with a tropical climate in  
777 southeastern Brazil. *Am J Trop Med Hyg*. 2002;67: 490–491.  
778 doi:10.4269/ajtmh.2002.67.490
- 779 28. Kfoury RA, Sadeck LSR, Moura AA, Bresolin AC, Miralha AL, Pimentel AM, et  
780 al. Diretrizes para o manejo da infecção causada pelo Vírus Sincicial Respiratório  
781 (VSR). *Soc Bras Pediatr*. 2017; 1–20.
- 782 29. Haynes AK, Manangan AP, Iwane MK, Sturm-Ramirez K, Homaira N, Brooks  
783 WA, et al. Respiratory Syncytial Virus Circulation in Seven Countries With  
784 Global Disease Detection Regional Centers. *J Infect Dis*. 2013;208: S246–S254.  
785 doi:10.1093/infdis/jit515
- 786 30. Bloom-Feshbach K, Alonso WJ, Charu V, Tamerius J, Simonsen L, Miller MA, et  
787 al. Latitudinal Variations in Seasonal Activity of Influenza and Respiratory  
788 Syncytial Virus (RSV): A Global Comparative Review. *PLoS ONE*. 2013;8:  
789 e54445. doi:10.1371/journal.pone.0054445
- 790 31. Moura FEA, Borges LC, Portes SAR, Ramos EAG, Siqueira MM. Respiratory  
791 syncytial virus infections during an epidemic period in Salvador, Brazil: viral  
792 antigenic group analysis and description of clinical and epidemiological aspects.  
793 *Mem Inst Oswaldo Cruz*. 2003;98: 739–743. doi:10.1590/S0074-  
794 02762003000600005
- 795 32. Straliootto SM, Siqueira MM, Muller RL, Fischer GB, Cunha MLT, Nestor SM.  
796 Viral etiology of acute respiratory infections among children in Porto Alegre, RS,  
797 Brazil. *Rev Soc Bras Med Trop*. 2002;35: 283–291. doi:10.1590/S0037-  
798 86822002000400002
- 799 33. Freitas ARR, Donalisio MR. Respiratory syncytial virus seasonality in Brazil:  
800 implications for the immunisation policy for at-risk populations. *Mem Inst*  
801 *Oswaldo Cruz*. 2016;111: 294–301. doi:10.1590/0074-02760150341
- 802 34. Yu J, Liu C, Xiao Y, Xiang Z, Zhou H, Chen L, et al. Respiratory Syncytial Virus  
803 Seasonality, Beijing, China, 2007–2015. *Emerg Infect Dis*. 2019;25: 1127–1135.  
804 doi:10.3201/eid2506.180532
- 805 35. Zhang H, Wen S, Zheng J, Chen X, Lv F, Liu L. Meteorological factors affecting  
806 respiratory syncytial virus infection: A time- series analysis. *Pediatr Pulmonol*.  
807 2020;55: 713–718. doi:10.1002/ppul.24629



- 808 36. Gardinassi LG, Simas PVM, Salomão JB, Durigon EL, Trevisan DMZ, Cordeiro  
809 JA, et al. Seasonality of viral respiratory infections in Southeast of Brazil: the  
810 influence of temperature and air humidity. *Braz J Microbiol.* 2012;43: 98–108.  
811 doi:10.1590/S1517-83822012000100011
- 812 37. Bradley JP, Bacharier LB, Bonfiglio J, Schechtman KB, Strunk R, Storch G, et al.  
813 Severity of Respiratory Syncytial Virus Bronchiolitis Is Affected by Cigarette  
814 Smoke Exposure and Atopy. *Pediatrics.* 2005;115: e7–e14.  
815 doi:10.1542/peds.2004-0059
- 816 38. Cardena MMSG, Ribeiro-dos-Santos Â, Santos S, Mansur AJ, Pereira AC,  
817 Fridman C. Assessment of the Relationship between Self-Declared Ethnicity,  
818 Mitochondrial Haplogroups and Genomic Ancestry in Brazilian Individuals. *PLoS*  
819 *ONE.* 2013;8: e62005. doi:10.1371/journal.pone.0062005
- 820 39. Brasil. Síntese de Indicadores Sociais: uma análise das condições de vida da  
821 população brasileira [cited 27 September 2020]. In Instituto Brasileiro de  
822 Geografia e Estatística (IBGE) [Internet]. Available from:  
823 <https://biblioteca.ibge.gov.br/visualizacao/livros/liv101629.pdf>.
- 824 40. Nair H, Nokes DJ, Gessner BD, Dherani M, Madhi SA, Singleton RJ, et al. Global  
825 burden of acute lower respiratory infections due to respiratory syncytial virus in  
826 young children: a systematic review and meta-analysis. *Lancet.* 2010;375: 1545–  
827 1555. doi:10.1016/S0140-6736(10)60206-1
- 828 41. Espinosa Y, San Martín C, Torres A, Farfán M, Torres J, Avadhanula V, et al.  
829 Genomic Loads and Genotypes of Respiratory Syncytial Virus: Viral Factors  
830 during Lower Respiratory Tract Infection in Chilean Hospitalized Infants. *Int J*  
831 *Mol Sci.* 2017;18: 654. doi:10.3390/ijms18030654
- 832 42. Rodriguez-Fernandez R, Tapia LI, Yang C-F, Torres JP, Chavez-Bueno S, Garcia  
833 C, et al. Respiratory Syncytial Virus Genotypes, Host Immune Profiles, and  
834 Disease Severity in Young Children Hospitalized With Bronchiolitis. *J Infect Dis.*  
835 2018;217: 24–34. doi:10.1093/infdis/jix543
- 836 43. Tran DN, Pham TMH, Ha MT, Tran TTL, Dang TKH, Yoshida L-M, et al.  
837 Molecular Epidemiology and Disease Severity of Human Respiratory Syncytial  
838 Virus in Vietnam. *PLoS ONE.* 2013;8: e45436. doi:10.1371/journal.pone.0045436
- 839 44. Hall CB, Walsh EE, Schnabel KC, Long CE, McConnochie KM, Hildreth SW, et  
840 al. Occurrence of Groups A and B of Respiratory Syncytial Virus over 15 Years:  
841 Associated Epidemiologic and Clinical Characteristics in Hospitalized and  
842 Ambulatory Children. *J Infect Dis.* 1990;162: 1283–1290.  
843 doi:10.1093/infdis/162.6.1283
- 844 45. Jafri HS, Wu X, Makari D, Henrickson KJ. Distribution of Respiratory Syncytial  
845 Virus Subtypes A and B Among Infants Presenting to the Emergency Department  
846 With Lower Respiratory Tract Infection or Apnea. *Pediatr Infect Dis J.* 2013;32:  
847 335–340. doi:10.1097/INF.0b013e318282603a
- 848 46. DeVincenzo JP, Wilkinson T, Vaishnav A, Cehelsky J, Meyers R, Nochur S, et al.  
849 Viral Load Drives Disease in Humans Experimentally Infected with Respiratory

- 850 Syncytial Virus. *Am J Respir Crit Care Med*. 2010;182: 1305–1314.  
851 doi:10.1164/rccm.201002-0221OC
- 852 47. Gómez- Novo M, Boga JA, Álvarez- Argüelles ME, Rojo- Alba S, Fernández A,  
853 Menéndez MJ, et al. Human respiratory syncytial virus load normalized by cell  
854 quantification as predictor of acute respiratory tract infection. *J Med Virol*.  
855 2018;90: 861–866. doi:10.1002/jmv.25020
- 856 48. Hijano DR, Brazelton de Cardenas J, Maron G, Garner CD, Ferrolino JA, Dallas  
857 RH, et al. Clinical correlation of influenza and respiratory syncytial virus load  
858 measured by digital PCR. *PLoS ONE*. 2019;14: e0220908.  
859 doi:10.1371/journal.pone.0220908
- 860 49. Moreira FB, Rosario CS, Santos JS, Avanzi VM, Nogueira MB, Vidal LR, et al.  
861 Molecular characterization and clinical epidemiology of human respiratory  
862 syncytial virus (HRSV) A and B in hospitalized children, Southern Brazil. *J Med  
863 Virol*. 2017;89: 1489–1493. doi:10.1002/jmv.24795
- 864 50. Fodha I, Vabret A, Ghedira L, Seboui H, Chouchane S, Dewar J, et al. Respiratory  
865 syncytial virus infections in hospitalized infants: Association between viral load,  
866 virus subgroup, and disease severity. *J Med Virol*. 2007;79: 1951–1958.  
867 doi:10.1002/jmv.21026
- 868 51. Garcia-Mauriño C, Moore-Clingenpeel M, Thomas J, Mertz S, Cohen DM, Ramilo  
869 O, et al. Viral Load Dynamics and Clinical Disease Severity in Infants With  
870 Respiratory Syncytial Virus Infection. *J Infect Dis*. 2019;219: 1207–1215.  
871 doi:10.1093/infdis/jiy655
- 872 52. Piedra F-A, Mei M, Avadhanula V, Mehta R, Aideyan L, Garofalo RP, et al. The  
873 interdependencies of viral load, the innate immune response, and clinical outcome  
874 in children presenting to the emergency department with respiratory syncytial  
875 virus-associated bronchiolitis. *PLoS ONE*. 2017;12: e0172953.  
876 doi:10.1371/journal.pone.0172953
- 877 53. Okamoto M, Dapat CP, Sandagon AMD, Batangan-Nacion LP, Lirio IC, Tamaki  
878 R, et al. Molecular Characterization of Respiratory Syncytial Virus in Children  
879 With Repeated Infections With Subgroup B in the Philippines. *J Infect Dis*.  
880 2018;218: 1045–1053. doi:10.1093/infdis/jiy256
- 881 54. Otieno JR, Kamau EM, Oketch JW, Ngoi JM, Gichuki AM, Binter Š, et al. Whole  
882 genome analysis of local Kenyan and global sequences unravels the  
883 epidemiological and molecular evolutionary dynamics of RSV genotype ON1  
884 strains. *Virus Evol*. 2018;4. doi:10.1093/ve/vey027
- 885 55. Esposito S, Piralla A, Zampiero A, Bianchini S, Di Pietro G, Scala A, et al.  
886 Characteristics and Their Clinical Relevance of Respiratory Syncytial Virus Types  
887 and Genotypes Circulating in Northern Italy in Five Consecutive Winter Seasons.  
888 *PLoS ONE*. 2015;10: e0129369. doi:10.1371/journal.pone.0129369
- 889 56. Bin Lu, Liu H, Tabor DE, Tovchigrechko A, Qi Y, Ruzin A, et al. Emergence of  
890 new antigenic epitopes in the glycoproteins of human respiratory syncytial virus

- 891 collected from a US surveillance study, 2015–17. *Sci Rep.* 2019;9: 3898.  
892 doi:10.1038/s41598-019-40387-y
- 893 57. Hall CB. Respiratory Syncytial Virus and Parainfluenza Virus. *N Engl J Med.*  
894 2001;344: 1917–1928. doi:10.1056/NEJM200106213442507
- 895 58. Elawar F, Griffiths CD, Zhu D, Bilawchuk LM, Jensen LD, Forss L, et al. A  
896 Virological and Phylogenetic Analysis of the Emergence of New Clades of  
897 Respiratory Syncytial Virus. *Sci Rep.* 2017;7: 12232. doi:10.1038/s41598-017-  
898 12001-6
- 899 59. Leemans A, Boeren M, Van der Gucht W, Martinet W, Caljon G, Maes L, et al.  
900 Characterization of the role of N-glycosylation sites in the respiratory syncytial  
901 virus fusion protein in virus replication, syncytium formation and antigenicity.  
902 *Virus Res.* 2019;266: 58–68. doi:10.1016/j.virusres.2019.04.006

Formatted: English (United States)

903

## 904 Supporting information captions

Formatted: Font: 18 pt

905 **S1**Supplementary Figure 1. RSV-A phylogenetic tree based on 336 bp of the HVR-2 of G gene. The tree  
906 was built using maximum likelihood method on MEGA 6.0 software from a MUSCLE alignment, with  
907 some manual editions. Reference sequences from each described genotype were downloaded from NCBI  
908 GenBank and used in the phylogenetic reconstruction. The genotypes were classified by colors and all ES  
909 strains grouped within the ON1 genotype.

910 **S2**Supplementary Figure 2. RSV-A phylogenetic tree based on 318 bp of the HVR-2 of G gene. The tree  
911 was built using maximum likelihood method on MEGA 6.0 software from a MUSCLE alignment, with  
912 some manual editions. Reference sequences from each described genotype were downloaded from NCBI  
913 GenBank and used in the phylogenetic reconstruction. The genotypes were classified by colors and all ES  
914 strains grouped within the BA genotype.

915 **S1**Supplementary Table 1. Primers, probes and DNA fragments used in our study. “F”, “R” and “P”,  
916 represent the sequence of the forward and reverse primers and the probe, respectively. Synthetic DNA  
917 fragment from RSV was included in a pMA-t vector.

918 **Supplementary S2** Table 2. List of the sequences used to build the phylogeny based on HVR-2 of gene G  
919 for both subtypes RSA-A and RSV-B.

920 **S3**Supplementary Table 3. List of the sequences used to build the phylogeny based on gene G for both  
921 subtypes RSV-A and RSV-B. Collection date of some sequences were unavailable.

922 **Supplementary Table 4.** Clinical Severity Score: the score varied between 0 and 5. Higher values were  
923 assumed to represent more severe illness. Need for ICU,  $O_2 \leq 95\%$ , length in hospital  $\geq 5$  days and  
924 requirement of  $O_2$  therapy accounted for 1 point each. Need for mechanical ventilation accounted for 2  
925 points. Patients infected with RSV-A were most commonly classified into the most severe scores. The  
926 difference between viral loads was not related to severity, but there was no statistical significance.

927 **S4**Supplementary Table 5. Differences in severity among ethnicities showing that children classified as  
928 black or brown showed  $O_2$  saturation  $\leq 95\%$  and respiratory distress more often than those classified as  
929 white. Also they required ventilator support more frequently and stand more time in hospital and in ICU.

930 **S5**Supplementary Table 6. Duration and climatic characteristics of RSV seasonality in the years studied.

931 **S6upplementary Table 7.** List of amino acid changes in RSV-A. Residues in blue and red show potential  
932 losses and gains of O-glycosylation sites, respectively.

933 **S7upplementary Table 8.** List of amino acid changes in RSV-B. Residues in blue and red show  
934 potential losses and gains of O-glycosylation sites, respectively.

## Response to Reviewers

Dear editors and reviewers, thank you for your attention in improving this study. Here are the answers for each observation.

Sincerely,  
Lucas Alves Vianna

### Editor comments:

**Comment 1:** Please ensure that your manuscript meets PLOS ONE's style requirements, including those for file naming. The PLOS ONE style templates can be found at:

[https://journals.plos.org/plosone/s/file?id=wjVg/PLOSONe\\_formatting\\_sample\\_main\\_body.pdf](https://journals.plos.org/plosone/s/file?id=wjVg/PLOSONe_formatting_sample_main_body.pdf) and

[https://journals.plos.org/plosone/s/file?id=ba62/PLOSONe\\_formatting\\_sample\\_title\\_authors\\_affiliations.pdf](https://journals.plos.org/plosone/s/file?id=ba62/PLOSONe_formatting_sample_title_authors_affiliations.pdf)

**Answer:** After a careful review, we have modified the formatting of the headings and legends of the supplementary figures and tables to meet PLOS ONE's style requirements. We also corrected some tables that presented values highlighted in red, contrary to the rules of PLOS ONE. Finally, we increased the font size of the Materials and methods, Results and Discussion subheadings to 16 pt, according to rules.

**Comment 2:** We note that you included minors (age<18) in your study. Please provide additional details regarding minor's consent. In the ethics statement in the Methods and online submission information, please ensure that you have specified whether you obtained consent from parents or guardians. If the need for consent was waived by the ethics committee, please include this information."

**Answer:** We agree with this observation. The sentence "The need for parents or guardians' consent was waived by the ethics committee." was included in "Ethics Statement" section. Please, check the lines 207-208.

### Reviewer #1 comments:

1. **Title - Revise the title to reflect the key findings of the research.**

**Answer:** To address this comment, we have changed the title to: “Seasonality, molecular epidemiology and virulence of Respiratory Syncytial Virus (RSV): a perspective into the Brazilian Influenza Surveillance Program”. However, considering that this study addressed several aspects of RSV, the inclusion of key findings would make the title too large and we have opted to make it shorter and easier to read.

**2. Introduction - Revise the introduction and make it shorter and its current form it distracts the reader.**

**Answer:** We have changed the introduction and eliminated sentences that, although interesting, would not affect the understanding of the objectives. However, Introduction size reduction was small. It turns out that this study has addressed multiple aspects of RSV (*e.g.*: prevalence, association between severity and subtypes, viral load, seasonality and association with climatic factors and phylogenetic aspects), as we understand that these are important aspects to discuss.

**3. Methodology - Organize the Methodology - Study population, experimental methods - RT-qPCR, sequencing etc. in a brief form that gives a good understanding of the sequence of events with relevant methodology.**

**Answer:** We have changed the way methods are presented, in order to maintain the same pattern presented at the results.

Thus, methods are now as follows:

1. Population sampling, study period and location
2. RSV and Influenza detection and subtyping
3. Clinical and epidemiological data collection
4. Viral load quantification
5. Climate data collection
6. Partial amplification and sequencing of glycoprotein gene
7. RSV genotyping and gene G phylogenetic reconstruction
8. Statistical treatment.
9. Data availability
10. Ethics Statement

**4. Results - They need to be organized in the order of appearance as in the Methodology. You do not have to replicate all the information given in the Tables in the texts. Redundancy also distracts the reader and I found it difficult to organize the results to understand the authors' way of cohesion.**

**Answer:** We think this comment will make the manuscript easier to read. As recommended, we have reorganized the objectives in the same pattern presented in the results, and eliminated redundant information.

**5. Discussion - Again follow the order of your results in Discussion.**

**Answer:** We have organized the discussion in the same order presented in Methods and Results and created subsections in the discussion, in order to improve reading.

**6. Overall - You must revise this manuscript shortening certain sections and organizing the manuscript from I to D. Otherwise the results produced cannot be understood by the authors.**

**Answer:** To address this recommendation, we have reduced the text as much as possible, without interfering with data presentation quality and consistency. We have reduced redundancies in the results (data being presented in the text and table) and removed some excerpts throughout the manuscript that we consider less relevant.

**7. Language must be clear, correct, and unambiguous. At its current form it is difficult to follow the authors. Please also look into typographical or grammatical errors when you revise the manuscript. You may ask a native speaker to read the manuscript after fixing all the issues indicated.**

**Answer:** we have asked a native speaker to thoroughly review the manuscript.

**8. Please follow the PLOS ONE formatting guidelines well before you submit after revision.**

**Answer:** We have done so.

**Reviewer #2 comments:**

- 1. The authors present generalized conclusions that are not specific to the Brazilian aspect or timeframe on which this study is based. Key results to support the identified objectives are not highlighted in the abstract or the conclusion (e.g. the influence of climate factors on RSV seasonality and the role of genetic diversity of RSV on disease severity). Clinical severity scores referenced in the abstract and results to support interpretations of the role of**

**viral load and genetic diversity of RSV on disease severity, should be presented in the main tables/figures of the manuscript as opposed to supplemental. The authors should revise these areas and sharpen the focus of their Discussion through reduction to improve readability and presentation of key messages of RSV surveillance in Brazil between 2016-2018 relative to previous observations in Brazil or other parts of the world during the similar timeframe.**

**Answer:** We appreciate the observations. However, some results of this study are not related to a specific location or timeframe. The correlation analyzes between viral load, genetic differences and severity are examples. These results possibly transcends the time and place of the study and, therefore, are not specific to the Brazilian aspect or timeframe.

As recommended, we have included the key results in both abstract and conclusion. We also transformed supplementary table 4 into Table 3. Previous table 3, which presented data on viral load, is now part of Table 4.

Given the different approaches taken in the study, we chose to divide the discussion into topics, in the hope of improving the quality of reading and regarding the discussion length, we removed some less important passages in order to improve the readability and presentation of key messages of the study.

- 2. The current title (and abstract) fail to address the presented timeframe of RSV surveillance or what aspects of “landscape” or “perspectives” the authors are referring to relative to their objectives and results. The authors should consider revision.**

**Answer:** as changing the Title was also a recommendation of Reviewer 1, and to clarify which aspects of the “landscape” the study focused on, we have changed the title to: “Seasonality, molecular epidemiology and virulence of Respiratory Syncytial Virus (RSV): a perspective into the Brazilian Influenza Surveillance Program”. We hope this new title is suitable for both Reviewers.

- 3. Figure 2 and Figure 3 are out of focus and uninterruptable for review. The authors should revise.**

**Answer:** Figures 2 and 3 were redone to improve quality and readability. We decided to change the size and save the file as .EPS.



4. Line 90-92, 130-133, and 270-276. The authors statement of “seasonal oscillation” (Line 90-92) is not supported by their main observations (Line 270-276) from Fig. 1, and in turn, their statement regarding “creating difficulties for determination of the most appropriate period to start prophylaxis” is not substantiated and is in contrast to their later statement of “recommends the administration of palivizumab from February to July” (Line 359). The authors state (Line 130-133) that “seasonality onset and end were defined as the first and last of 2 consecutive weeks, respectively, when the number of RSV cases exceeded 10% of the number detected during the RSV peak week” and reference Obando-Pacheco et al 2018 [21]. However, Obando-Pacheco et al 2018 states that “the onset of RSV season was defined as the first 2 consecutive weeks when >10% of the total tested samples for respiratory pathogens were positive for RSV. The end of the RSV season was defined similarly as when the proportion of positive RSV tests fell below 10% for 2 consecutive weeks.”. Given the impact of molecular testing on determining RSV seasonality, the authors should revise their analysis and adopt a more accepted threshold for seasonality assessment based on %RSV positive cases as opposed to the number of RSV cases to support a potential interpretation of “seasonal oscillation” (see also Midgley et al. 2017 JID 216(3):345-355).

**Answer:** We agree with the Reviewer, and, in fact, there was a misinterpretation of season beginning and end definition by Obando-Pacheco et al. (2018). Therefore, we reviewed the data and corrected the analysis. However, there were no changes in season onset in any year, but there were small changes in season end, as described below:

1. End in 2016: from EW 33 to EW 32.
2. End in 2017: from EW 30 to EW 31.
3. End in 2018: from EW 26 to EW 27.

Although the reviewer understood that the data do not support the claim that there was a fluctuation in season period during the study, we would like to point out that in 2016 and 2017 the RSV seasonal period started at epidemiological week (EW) 12 and ended at EW 32 and 31, respectively. In contrast, in 2018 the season was anticipated to EW 3, which is 9 weeks before the start in previous years. Season end was also anticipated to EW 27. There are the reasons why we understand there was an oscillation in the seasonal period during our study. As Palivizumab is administered in five consecutive monthly doses and considering that the first dose should be administered one month before season start, this oscillation may have an impact in the administration of prophylactic drugs.

In order to make this point clearer, we have restructured the discussion paragraphs.

5. **Table 1: The authors should revise this Table to provide both numerators and denominators to allow for readability and logical follow with the main text. This will also allow the reader to appropriately follow the statistical assessment employed of relative proportions. In addition, Influenza prevalence is noted in the main text, but not in the corresponding Table 1. The authors should to revise the Table to include all relevant data for the reader.**

**Answer:** we have revised Table 1, making the requested changes.

6. **Line 225-232 and Table 2: The authors should rephrase their statement regarding “clinical features of patients affect by RSV” to better reflect clinical characteristics of patients with SARI, since clinical data are presented for the total 632 patients and the 327 patients with RSV (180 RSV-A and 147 RSV-B). The numbers and percentages in the main text reflect the total population (N=632) and not the population of patients with RSV disease (N=327). The authors should further revise this Table to provide both numerators and denominators to allow for readability and logical follow with the main text. This will also allow the reader to appropriately follow the statistical assessment employed of relative proportions and to distinguish between RSV and everything else. Finally, viral load data in Table 2 is out of place without a (%) and should be included in Table 3 where viral load values are presented.**

**Answer:** Table 2 and the associated text present clinical data only of RSV infected patients. This table had an error in the "Sample number" field, which contained the total number of samples studied (632), however, the analyzes were performed only with the 352 RSV positive children. The error has been corrected. We took the opportunity to correct some fields containing three decimal places, standardizing the values to two decimal places. We have also relocated table 2 viral load data to table 3, as suggested. Finally, we included denominators to facilitate data interpretation.

#### **Minor Comments for Author (Required)**

7. **Line 17 and 40. The authors are repetitive in their statements in the Background and Conclusion sections of their Abstract regarding “understanding seasonality, genetic features...may support antiviral and vaccine development. The authors should revise the abstract and clarify how the results of this study specifically support antiviral and vaccine development.**

**Answer:** We have eliminated the redundant part from the "Background" and briefly discussed how seasonal period, virulence and genetic diversity can assist in the development and application of vaccines and antiviral drugs.

- 8. Lines 21, 38, 81, 83, 88, 339-440. Is the Brazilian Influenza Surveillance Program part of WHO's Global Respiratory Syncytial Virus Surveillance Pilot and/or the Global Influenza Surveillance and Response System (GISRS)? The authors should consider revising for clarity; in particular Lines 338-340 at the start of the Discussion section where both programs are discussed in the context of the objectives of the current study. Recommend that the authors be consistent throughout the manuscript in their reference to the Influenza Surveillance Program as to which this study is based on (ie. National, Brazilian, or just Influenza Surveillance Program are used throughout the manuscript; pick one version and capitalize all words).**

**Answer:** The Brazilian Influenza Surveillance Program is part of WHO's Global Respiratory Syncytial Virus Surveillance. We chose to use the term "Brazilian Influenza Surveillance Program" with capital words, as suggested.

- 9. Line 30 and Line 105: What were the remaining 44% of case caused by, all influenza?**

**Answer:** In this study, only RSV and Influenza were tested. In 56% of the cases RSV was detected, the influenza virus was found in 7% of the samples and the remaining 37% cases were undetermined.

- 10. Line 48: The authors should clarify in the text the source of the "Influenza and other respiratory virus epidemiological reports" as to whether these are from the Brazilian and/or National Influenza Surveillance Program.**

**Answer:** We have followed previous Reviewers' recommendations to shorten the introduction, and because of that we have removed this text, as explained to the other reviewer.

- 11. Line 57: The authors should explain the rationale as to why the previously observed significant association between viral load and disease severity should be more carefully studied in the Introduction. The authors later state in the Discussion that the correlation between viral load and disease severity remains controversial (Line 423). The authors are advised to further emphasize that one of the strengths of their study in finding of a lack of correlation between viral load and disease severity is the use of standardized methods for measuring viral load (see Lines 432-442)**

**Answer:** To address that, we have rewritten the Introduction as follows:

“Some studies have evaluated the association between viral load and disease severity, with significant associations [6,7]. However, **most of these studies did not use standardized methods of viral load measurement**, therefore, this relationship must be more carefully evaluated.”

- 12. Line 60: The authors should revise this sentence to clarify that the context by which “the treatment is based” in referring to RSV since this is new paragraph.**

**Answer:** We have rephrased the sentence to: “RSV treatment is based only [...]”.

- 13. Line 72: The authors should supplement reference 15 with a reference that defines the multiple genotypes of RSV-B.**

**Answer:** We have added the study by Trento et al. (2006)<sup>1</sup> which was already mentioned in reference #17 (now reference #14, since due to the removal of some sections to reduce the text, the corresponding references were also removed).

- 14. Line 78: Reference 15 does not support the statement that understanding RSV genetic diversity will help designing antiviral drugs, diagnostic assays, and vaccines. The authors should revise.**

**Answer:** It is possible to find in reference 15 (now reordered to reference 13) two excerpts that support this statement: “RSV diversity is an important factor that allows for reinfections to occur throughout life and also has implications for design of diagnostic assays, antiviral therapies, and preventive strategies (passive immunization and vaccines)”. (*in the introduction*).

“Genotype classification and assignment is of importance in order to understand the evolution, epidemiology, and clinical presentation of this virus, and has implications regarding the development of vaccines and other preventive interventions.” (*in the discussion*).

- 15. Fig 1: The y-axis and X-axis should be labeled within the figure.**

**Answer:** Figure 1 has been edited, including caption for the two Y axes and the X axis. Caption is displayed in a text box.

- 16. Line 126-127: Location of INCAPER should be provided.**

---

<sup>1</sup> Trento A, Viegas M, Galiano M, Videla C, Carballal G, Mistchenko AS, et al. Natural History of Human Respiratory Syncytial Virus Inferred from Phylogenetic Analysis of the Attachment (G) Glycoprotein with a 60-Nucleotide Duplication. *J Virol.* 2006;80: 975–984. doi:10.1128/JVI.80.2.975-984.2006

**Answer:** We have included the city, state and country of INCAPER. Please, check the line 145.

- 17. Line 143: The authors should define in Supplemental Table 1 or elsewhere in the main text what RSV gene the primers and probes used to subtype RSV-A and RSV-B were directed against.**

**Answer:** In the methodology, we include the requested information as follows: “RSV positive samples (i.e. those with cycle threshold [CT]  $\leq$  40) were subtyped using specific primers and probes to **N** gene of RSV-A and RSV-B.” Please, check the line 105.

- 18. Line 161: The authors should clarify what they mean by “partial amplification” and by RSV positive samples with Ct values between 30-40 were not subjected or attempted for sequencing.**

**Answer:** Partial amplification in this case refers to the fact only part of the gene was amplified. We have included the approximate sequenced G gene fragment size, as follows:

“The partial gene G amplification (about 730 bp) was performed at LVRIS/IOC/FIOCRUZ”

We have also included the following sentence in bold: “a) cycle threshold (ct) value less than 30, **due to the difficulty in sequencing samples with higher ct than this;**”

- 19. Line 179-180: The authors should provide a reference to the source of their reference sequences.**

**Answer:** The requested data is already available in supplementary tables 2 and 3. All reference sequences were taken from NCBI Genbank. These supplementary tables contain access numbers, genotypes and collection locations of each sequence.

- 20. Line 37, 74, 194, 294, 334, 421, 444, 466: The authors should correct their documentation of the RSV B genotype from BA to BA1 per the accession number provided and documented.**

**Answer:** The classification into the BA cluster is controversial. We prefer classify as BA. More studies are needed to standardize the RSV nomenclature of genotypes into BA and ON1.
